# Supplementary material for: Photoredox-catalyzed C-heteroaryl glycosylation of biphenyl isocyanides with glycosyl bromides
Source: Royal Society of Chemistry journal article supplement (doi:10.1039/d3cc03812b), 2023-01-01

# Supporting Information

## Photoredox-Catalyzed C-Heteroaryl Glycosylation of Biphenyl Isocyanides with Glycosyl Bromides

Yi Jiao, Xiaoran Shi, Shouyun Yu\*

State Key Laboratory of Analytical Chemistry for Life Science, Jiangsu Key  
Laboratory of Advanced Organic Materials, Chemistry and Biomedicine  
Innovation Center (ChemBIC), School of Chemistry and Chemical Engineering,  
Nanjing University, Nanjing 210023 (China)

E-mail: yushouyun@nju.edu.cn

## Table of Contents

|                                                            |      |
|------------------------------------------------------------|------|
| 1. General Information .....                               | S3   |
| 2. Numbering and Structure of All Substrates.....          | S 4  |
| 3. Optimization of Conditions .....                        | S 5  |
| 4. Reaction Setup.....                                     | S 11 |
| 5. Gram-Scale Preparation and Hydrolysis of <b>5</b> ..... | S 11 |
| 6. Mechanism Study .....                                   | S 13 |
| 6.1 Radical Trap Experiment.....                           | S 13 |
| 6.2 Stern-Volmer Fluorescence Quenching Experiment.....    | S 13 |
| 7. General Procedure for the Synthesis of Products .....   | S 15 |
| 8. Product Characterization .....                          | S 15 |
| 9. References .....                                        | S 34 |
| 10. NMR Spectra Data for the Products.....                 | S 35 |

## 1. General Information

Commercial reagents were purchased from Aldrich Chemical, 3A, Alfa Aesar, TCI, Strem, Acros, Energy Chemical, J&K Chemical, Innochem and were used as received. All catalytic reactions were run in dried glassware. Thin layer chromatography (TLC) was performed on EMD precoated plates (silica gel 60 F254, Art 5715) and visualized by fluorescence quenching under UV light and by staining with phosphomolybdic acid or potassium permanganate, respectively. Column chromatography was performed on EMD Silica Gel 60 (300–400 Mesh) using a forced flow of 0.5–1.0 bar. <sup>1</sup>H NMR (400 MHz), <sup>13</sup>C NMR (100 MHz) and <sup>19</sup>F (376 MHz) were measured on a Bruker AVANCE III–400 spectrometer. Chemical shifts are expressed in parts per million (ppm) with respect to the residual solvent peak. Coupling constants are reported as Hertz (Hz), signal shapes and splitting patterns are indicated as follows: s, singlet; d, doublet; t, triplet; q, quartet; m, multiplet. High Resolution Mass spectra were performed on Agilent 1260 Series (ESI Source). High-pressure liquid chromatography (HPLC) was performed on Agilent 1260 Series chromatographs using chiral columns as noted for each compound. Optical rotations were measured on an automatic polarimeter with  $[\alpha]_D^{20}$  values; concentration (c) is in g/100 mL. The synthesis of glycosyl bromides **1a-1m** and isocyanides **2a-2l** was according to literature procedures.<sup>1-7</sup>

## 2. Numbering and Structure of All Substrates

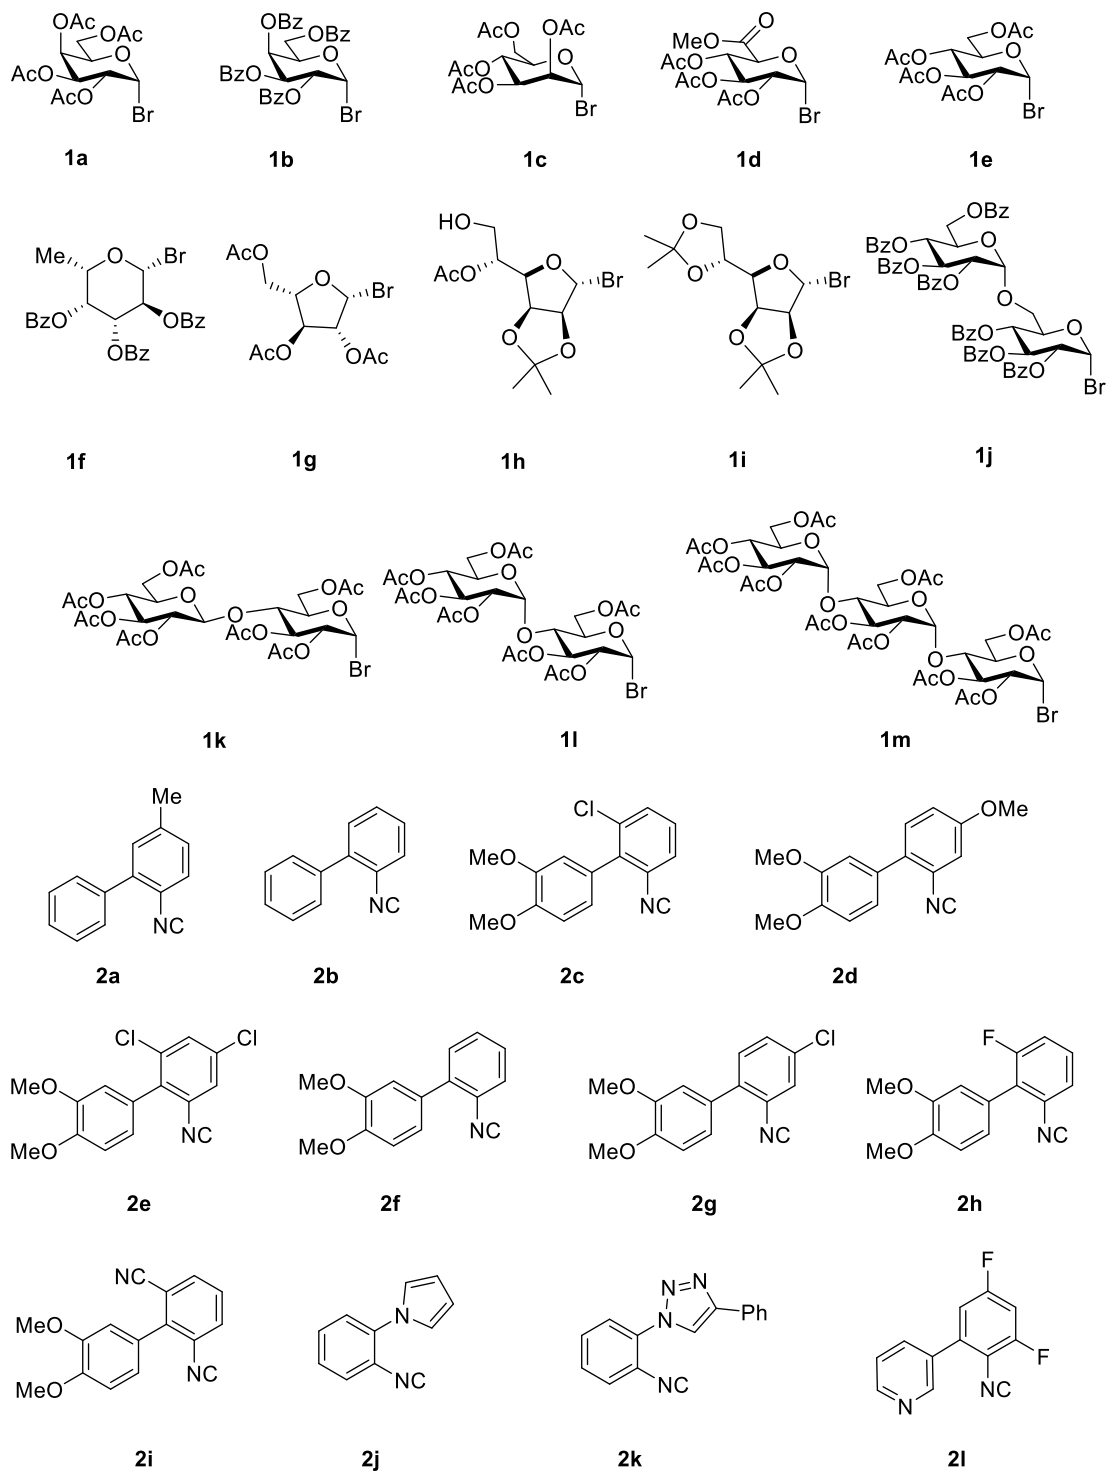

### 3. Optimization of Conditions

**Table S1.** The screening of solvent<sup>a</sup>

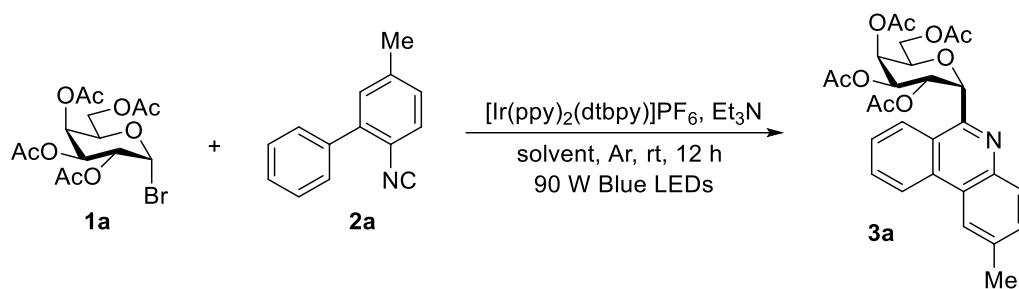

| Entry | Solvent           | yield/% <sup>b</sup>  |
|-------|-------------------|-----------------------|
| 1     | PhCl              | 69 (58 <sup>c</sup> ) |
| 2     | MeCN              | N.D.                  |
| 3     | DCM               | 65                    |
| 4     | DCE               | 49                    |
| 5     | EA                | 53                    |
| 6     | Et <sub>2</sub> O | trace                 |
| 7     | THF               | 50                    |
| 8     | dioxane           | 53                    |
| 9     | toluene           | 72                    |
| 10    | PhCF <sub>3</sub> | 64                    |
| 11    | PhEt              | 74                    |
| 12    | Xylene            | 70                    |
| 13    | DMSO              | N. D.                 |

<sup>a</sup>Reaction conditions: A solution of **1a** (0.1 mmol), **2a** (0.2 mmol),  $\text{Ir}(\text{ppy})_2(\text{dtbbpy})\text{PF}_6$  (2 mol%) and  $\text{Et}_3\text{N}$  (0.2 mmol) in solvent (1 mL) was irradiated by 90 W blue LEDs for 12 hours. <sup>b</sup>Yield was determined by <sup>1</sup>H NMR using dimethyl terephthalate as internal standard. N. D. = No Detection. <sup>c</sup>Isolated yield.

**Table S2.** The screening of photocatalysis<sup>a</sup>

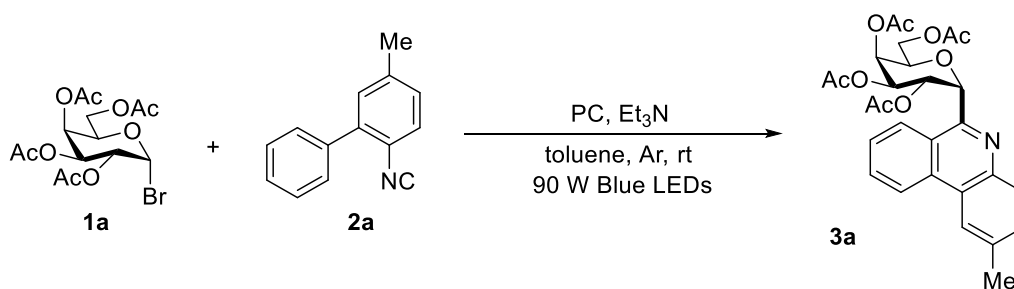

| Entry | PC                                                               | yield/% <sup>b</sup> |
|-------|------------------------------------------------------------------|----------------------|
| 1     | [Ir(ppy) <sub>2</sub> (dtbbpy)]PF <sub>6</sub>                   | 73                   |
| 2     | Ir(ppy) <sub>3</sub>                                             | N. D.                |
| 3     | [Ru(bpy) <sub>3</sub> ](PF <sub>6</sub> ) <sub>2</sub>           | N. D.                |
| 4     | [Ir(dFCF <sub>3</sub> ppy) <sub>2</sub> (dtbbpy)]PF <sub>6</sub> | 61                   |
| 5     | 4CzIPN                                                           | 49                   |
| 6     | Eosin Y                                                          | N. D.                |
| 7     | 10-phenyl-10H-phenothiazine                                      | N. D.                |
| 8     | 9,10-Dicyanoanthracen                                            | N. D.                |

<sup>a</sup>Reaction conditions: A solution of **1a** (0.1 mmol), **2a** (0.2 mmol), PC (2 mol%) and Et<sub>3</sub>N (0.2 mmol) in toluene (1 mL) was irradiated by 90 W blue LEDs for 12 hours.

<sup>b</sup>Yield was determined by <sup>1</sup>H NMR using dimethyl terephthalate as internal standard. N. D. = No Detection.

**Table S3.** The screening of base<sup>a</sup>

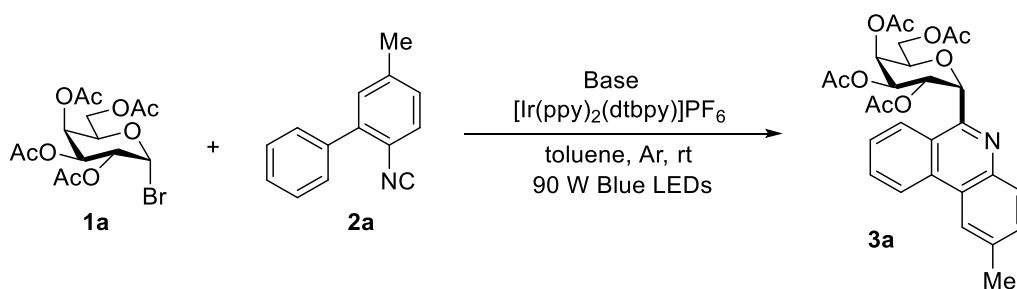

| Entry | Base                | yield/% <sup>b</sup> |
|-------|---------------------|----------------------|
| 1     | Et <sub>3</sub> N   | 75                   |
| 2     | DIPEA               | 59                   |
| 3     | n-Bu <sub>3</sub> N | 71                   |
| 4     | quinuclidine        | N. D.                |

<sup>a</sup>Reaction conditions: A solution of **1a** (0.1 mmol), **2a** (0.2 mmol), Ir(ppy)<sub>2</sub>(dtbbpy)PF<sub>6</sub> (2 mol%) and base (0.2 mmol) in toluene (1 mL) was irradiated by 90 W blue LEDs for 12 hours. <sup>b</sup>Yield was determined by <sup>1</sup>H NMR using dimethyl terephthalate as internal standard. N. D. = No Detection.

**Table S4.** The screening of light source<sup>a</sup>

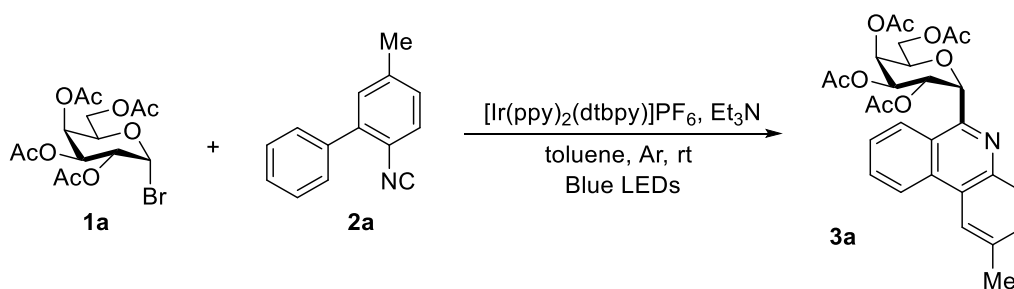

| Entry | Light source    | yield/% <sup>b</sup> |
|-------|-----------------|----------------------|
| 1     | 90 W Blue LEDs  | 76                   |
| 2     | 390 nm LEDs     | 60                   |
| 3     | 427 nm LEDs     | 71                   |
| 4     | 440 nm LEDs     | 68                   |
| 5     | 456 nm LEDs     | 59                   |
| 6     | 467 nm LEDs     | 66                   |
| 7     | 90 W White LEDs | 69                   |

<sup>a</sup>Reaction conditions: A solution of **1a** (0.1 mmol), **2a** (0.2 mmol), PC (2 mol%) and  $\text{Et}_3\text{N}$  (0.2 mmol) in toluene (1 mL) was irradiated by blue LEDs for 12 hours. <sup>b</sup>Yield was determined by  $^1\text{H}$  NMR using dimethyl terephthalate as internal standard. N. D. = No Detection.



**Table S5.** The screening of other conditions<sup>a</sup>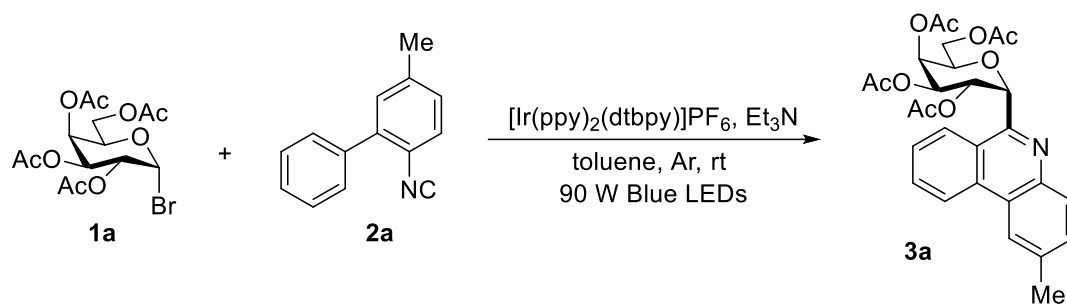

| Entry | Variations                                               | yield/% <sup>b</sup>       |
|-------|----------------------------------------------------------|----------------------------|
| 1     | none                                                     | 75                         |
| 2     | 24h                                                      | 72                         |
| 3     | <b>1a</b> : <b>2a</b> = 1 : 1                            | 57                         |
| 4     | <b>1a</b> : <b>2a</b> = 1 : 1.5                          | <b>92 (85<sup>c</sup>)</b> |
| 5     | <b>1a</b> : <b>2a</b> = 1.5 : 1                          | 71                         |
| 6     | 1 mol% PC                                                | 67                         |
| 7     | 5 mol% PC                                                | 64                         |
| 8     | 0.1 mmol $\text{Et}_3\text{N}$                           | 62                         |
| 9     | 0.4 mmol $\text{Et}_3\text{N}$                           | 67                         |
| 10    | w/o light                                                | N. D.                      |
| 11    | w/o PC                                                   | N. D.                      |
| 12    | $\text{K}_2\text{CO}_3$ instead of $\text{Et}_3\text{N}$ | N. D.                      |

<sup>a</sup>Reaction conditions: A solution of **1a** (0.1 mmol), **2a** (0.2 mmol),  $[\text{Ir}(\text{ppy})_2(\text{dtbbpy})]\text{PF}_6$  (2 mol%) and  $\text{Et}_3\text{N}$  (0.2 mmol) in toluene (1 mL) was irradiated by 90 W blue LEDs for 12 hours. <sup>b</sup>Yield was determined by  $^1\text{H}$  NMR using dimethyl terephthalate as internal standard. N. D. = No Detection. <sup>c</sup>Isolated yield.

**Table S5.** The screening of light source for **1a** and **2c**<sup>a</sup>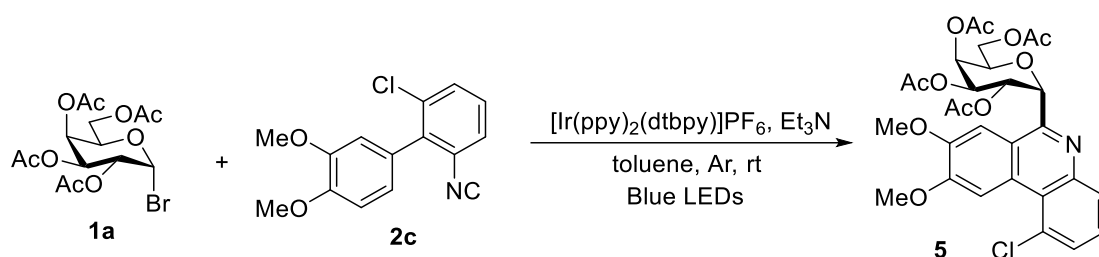

| Entry | Light source   | Reaction time needed | yield/% <sup>b</sup>       |
|-------|----------------|----------------------|----------------------------|
| 1     | 90 W Blue LEDs | 72 h (not complete)  | 63                         |
| 2     | 390 nm LEDs    | 36 h                 | trace                      |
| 3     | 427 nm LEDs    | 24 h                 | 67                         |
| 4     | 440 nm LEDs    | 24 h                 | <b>85 (75<sup>c</sup>)</b> |
| 5     | 456 nm LEDs    | 36 h                 | 77                         |
| 6     | 467 nm LEDs    | 36 h                 | 77                         |

<sup>a</sup>Reaction conditions: A solution of **1a** (0.1 mmol), **2c** (0.15 mmol),  $\text{Ir}(\text{ppy})_2(\text{dtbbpy})\text{PF}_6$  (2 mol%) and  $\text{Et}_3\text{N}$  (0.2 mmol) in toluene (1 mL) was irradiated by blue LEDs under TLC monitoring. <sup>b</sup>Yield was determined by <sup>1</sup>H NMR using dimethyl terephthalate as internal standard. N. D. = No Detection. <sup>c</sup>Isolated yield.

#### 4. Reaction Setup

Medium-sized screw-cap test tubes (8 mL) were used for all 0.1 mmol scale reactions: Fisher 13 x 100 mm tubes (Cat. No. 14-959-35C). Cap with Septa: Thermo Scientific ASM PHN CAP w/PTFE/SIL (Cat. No. 03378316)

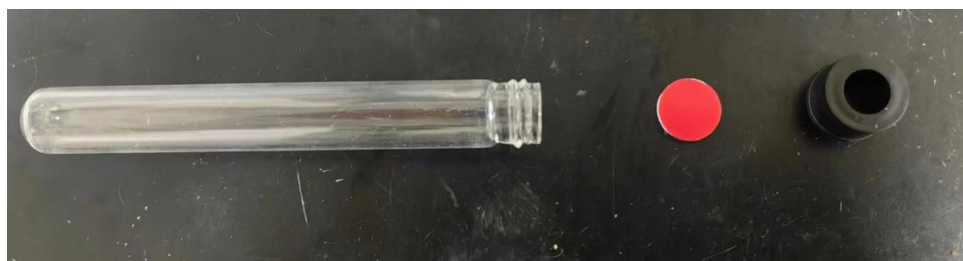

Light source: Kessil<sup>®</sup> A360W E-SERIES TUNA BLUE. The distance between the tube and the lamp was about 10 cm (two fans was added)

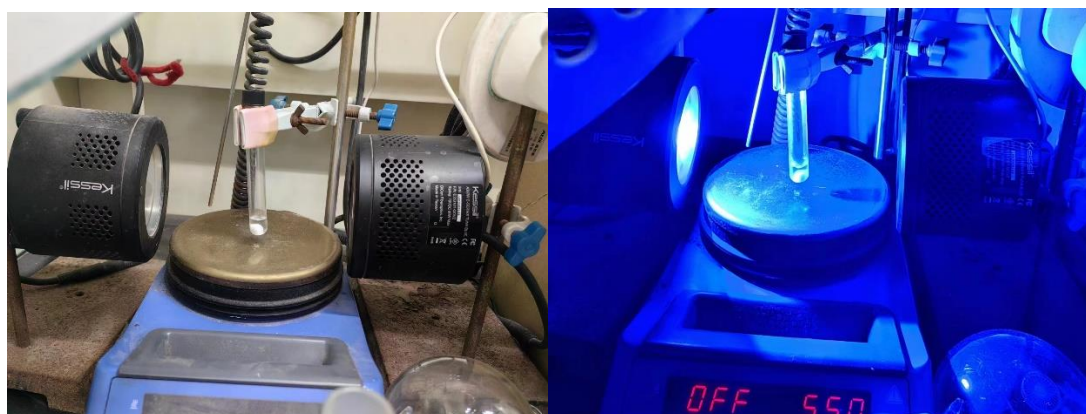

Figure S1. The reaction setup

#### 5. Gram-Scale Preparation and Hydrolysis of 5

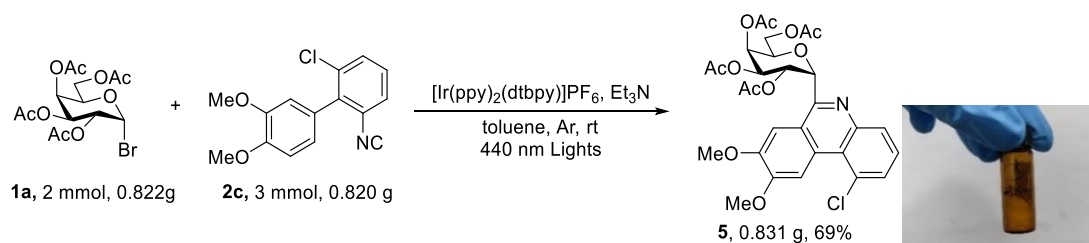

To a dry 50mL schlenk flask was added stirring bar, galactose bromide **1a** (0.822 g, 2 mmol), isocyanide **2a** (0.820 g, 3 mmol) and [Ir(ppy)<sub>2</sub>(dtbbpy)]PF<sub>6</sub> (2 mol%, 36.7 mg), and was replaced by argon for three times. Then, Et<sub>3</sub>N (555 μL) and toluene (20

mL) are injected into flask. The mixture were stirred and irradiated by 90 W blue LEDs at room temperature for 24h. After TLC completion, it was extracted with EA, washed with water, brine and dried. The organic phase was concentrated and purified by flash chromatography (petroleum ether: ethyl acetate = 3:1, R<sub>f</sub> = 0.4) to give **5** (0.831 g, 69%) as a white solid.

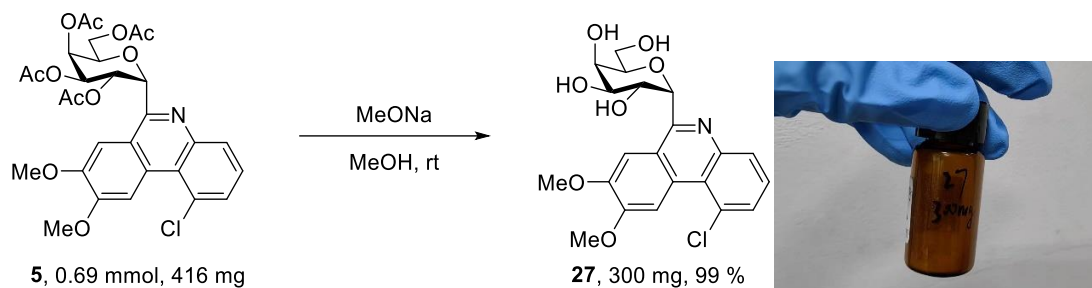

A magnetic stirring bar, **5** (416 mg, 0.69 mmol) and MeONa (37 mg, 0.69 mmol) were added to a 50 mL flask. 6 mL methanol was added, and the suspension was stirred at rt overnight. The emulsion was filtered to give hydrolysis product **27** (300 mg) quantitatively as white solid.  $[\alpha]_{\text{D}}^{20} = +94.2$  (c 0.24, DMSO),  $^1\text{H NMR}$  (400 MHz, DMSO- $d_6$ )  $\delta$  9.24 (s, 1H), 8.18 (s, 1H), 8.05 (dd,  $J = 8.1, 1.5$  Hz, 1H), 7.83 (dd,  $J = 7.7, 1.5$  Hz, 1H), 7.69 (t,  $J = 7.9$  Hz, 1H), 5.72 (d,  $J = 3.8$  Hz, 1H), 5.43 (d,  $J = 5.5$  Hz, 1H), 5.05 (s, 1H), 4.68 (s, 1H), 4.46 (s, 1H), 4.28 – 4.16 (m, 2H), 4.02 (s, 3H), 4.01 (s, 3H), 3.99 – 3.95 (m, 1H), 3.82 – 3.77 (m, 1H), 3.62 (d,  $J = 2.6$  Hz, 2H).  $^{13}\text{C NMR}$  (101 MHz, DMSO- $d_6$ )  $\delta$  158.33, 151.26, 148.91, 143.01, 130.65, 129.67, 128.61, 127.67, 127.19, 121.79, 120.53, 107.80, 106.28, 76.86, 71.11, 70.58, 70.27, 66.99, 58.96, 55.66, 55.62. HRMS (ESI)  $m/z$ :  $[\text{M}+\text{H}]^+$  Calcd for  $\text{C}_{21}\text{H}_{22}\text{ClNO}_7$  436.1158; Found 436.1160.

## 6. Mechanism Study

### 6.1 Radical Trap Experiment

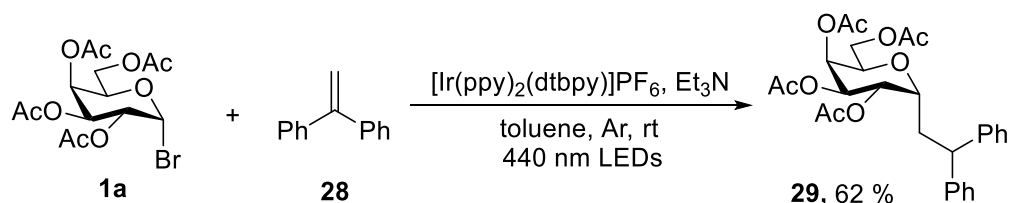

In a 8 mL screw-cap tube equipped with a magnetic stirring bar was added glycosyl bromide **1a** (0.1 mmol, 41 mg), 1,1-Diphenylethylene **28** (0.5 mmol, 90 mg) and  $[\text{Ir}(\text{ppy})_2(\text{dtbbpy})]\text{PF}_6$  (2 mol%, 1.8 mg). The tube was changed with Argon for three times, in which  $\text{Et}_3\text{N}$  was injected, and then 440 nm LEDs was applied to the tube at rt overnight. After TLC completion, it was extracted with EA, washed with  $\text{H}_2\text{O}$ , brine and dried. Concentration and flash chromatography giving radical trapping product **29** (32 mg, 62%) as colorless oil.  $[\alpha]_{\text{D}}^{20} = +61.9$  (c 1.7,  $\text{CHCl}_3$ ).  $^1\text{H}$  NMR (400 MHz,  $\text{CDCl}_3$ )  $\delta$  7.34 – 7.24 (m, 6H), 7.24 – 7.16 (m, 4H), 5.40 (dd,  $J = 3.2, 2.1$  Hz, 1H), 5.25 (dd,  $J = 9.4, 5.1$  Hz, 1H), 5.19 (dd,  $J = 9.4, 3.2$  Hz, 1H), 4.16 – 4.00 (m, 4H), 2.39 (ddd,  $J = 14.5, 11.4, 4.5$  Hz, 1H), 2.21 (ddd,  $J = 14.5, 11.3, 3.2$  Hz, 1H), 2.11 (s, 3H), 2.09 (s, 3H), 2.07 (s, 3H), 2.05 – 2.01 (m, 1H), 1.98 (s, 3H).  $^{13}\text{C}$  NMR (101 MHz,  $\text{CDCl}_3$ )  $\delta$  170.61, 170.22, 170.11, 169.79, 144.65, 143.01, 128.83, 128.74, 128.12, 127.70, 126.82, 126.59, 70.23, 68.53, 68.40, 68.29, 67.74, 61.79, 46.67, 31.78, 20.93, 20.79, 20.76. HRMS (ESI)  $m/z$ :  $[\text{M}+\text{H}]^+$  Calcd for  $\text{C}_{28}\text{H}_{32}\text{O}_9$  513.2119; Found 513.2119.

### 6.2 Stern-Volmer Fluorescence Quenching Experiment

A Hitachi F-7000 fluorescence spectrometer was used to record the emission intensities. All  $[\text{Ir}(\text{ppy})_2(\text{dtbbpy})]\text{PF}_6$  solutions were excited at 376 nm and the emission intensity at 573 nm was observed. Some  $\text{CH}_3\text{CN}$  was degassed with a stream of Ar for 30 min. In a typical experiment, the emission spectrum of a  $5 \times 10^{-4}$  M solution of eosin Y in  $[\text{Ir}(\text{ppy})_2(\text{dtbbpy})]\text{PF}_6$  was collected. Then, appropriate amount of triethylamine was added to the measured solution in a quartz cuvette and the emission

spectrum of the sample was collected.  $I_0$  and  $I$  represent the intensities of the emission in the absence and presence of the quencher at 573 nm.

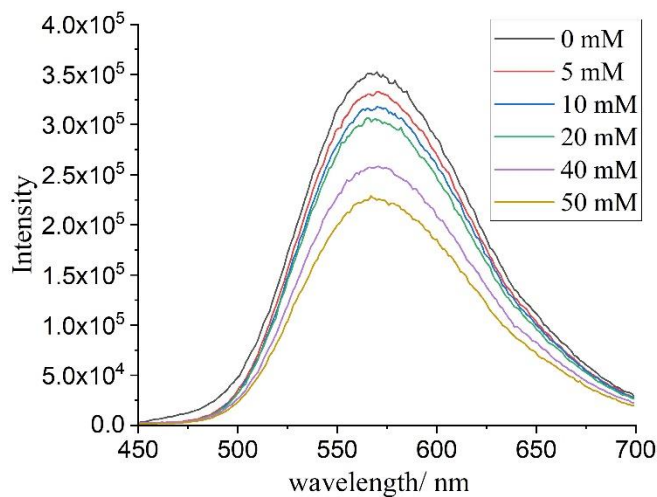

**Figure S3.** Emission spectra of  $5 \times 10^{-4}$  mol/L  $[\text{Ir}(\text{ppy})_2(\text{dtbbpy})]\text{PF}_6$  at  $\lambda_{\text{ex}} = 376$  nm

Quenching experiment:  $\text{Et}_3\text{N} + 5 \times 10^{-4}$  mol/L  $[\text{Ir}(\text{ppy})_2(\text{dtbbpy})]\text{PF}_6$

| Concentration (mM) | Intensity (573 nm) | $I_0/I$ |
|--------------------|--------------------|---------|
| 0                  | 349830             | 1       |
| 5                  | 331350             | 1.06    |
| 10                 | 315530             | 1.10    |
| 20                 | 301010             | 1.16    |
| 40                 | 256200             | 1.36    |
| 50                 | 224570             | 1.56    |

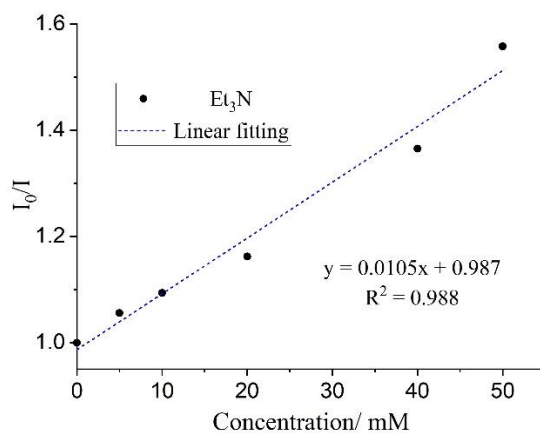

**Figure S4.** The linear relationship over the increasing concentration of  $\text{Et}_3\text{N}$

## 7. General Procedure for the Synthesis of Products

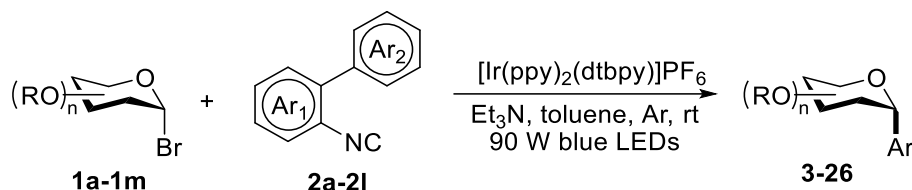

In an 8 mL screw-cap tube equipped with a magnetic stirring bar was added sugar bromide **1a-1m** (0.1 mmol, 1 equiv), isocyanide **2a-2l** (0.15 mmol, 1.5 equiv) and  $[\text{Ir}(\text{ppy})_2(\text{dtbbpy})]\text{PF}_6$  (2 mol%, 1.8 mg). The tube was changed with Argon for three times, then  $\text{Et}_3\text{N}$  was injected, and 440 nm LEDs was applied to the tube at rt for 12-36 h. After TLC completion, it was extracted with EA, washed with  $\text{H}_2\text{O}$ , brine and dried. The residue was concentrated and purified with flash chromatography to afford product **3-26**.

## 8. Product Characterization

**(2R,3S,4R,5S,6R)-2-(acetoxymethyl)-6-(2-methylphenanthridin-6-yl)tetrahydro-2H-pyran-3,4,5-triyl triacetate**

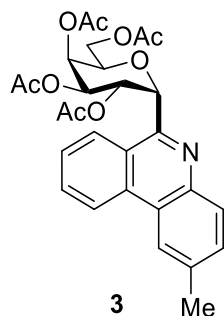

According to the general procedure from **1a** (0.1 mmol, 41 mg) and **2a** (0.15 mmol, 29 mg), **3** (44 mg, 85%) was obtained as white solid. Flash column chromatography eluent, Petroleum ether: ethyl acetate = 3:1 - 2:1, reaction time = 12 h.  $[\alpha]_{\text{D}}^{20} = +86.1$  (c 0.27,  $\text{CHCl}_3$ ).  $^1\text{H}$  NMR (400 MHz,  $\text{CDCl}_3$ )  $\delta$  8.66 (dd,  $J = 8.3, 1.3$  Hz, 1H), 8.40 – 8.35 (m, 1H), 8.31 (dd,  $J = 8.4, 1.4$  Hz, 1H), 8.17 (d,  $J = 8.3$  Hz, 1H), 7.83 (ddd,  $J = 8.4, 7.0, 1.3$  Hz, 1H), 7.68 (ddd,  $J = 8.3, 7.0, 1.3$  Hz, 1H), 7.59 (dd,  $J = 8.4, 2.0$  Hz, 1H), 6.90 (dd,  $J = 10.5, 3.7$  Hz, 1H), 6.34 (d,  $J = 6.4$  Hz, 1H), 5.78 (dd,  $J = 10.5, 6.3$  Hz, 1H), 5.62

(dd,  $J = 3.7, 1.6$  Hz, 1H), 4.39 (td,  $J = 6.7, 1.6$  Hz, 1H), 4.03 (dd,  $J = 6.6, 1.8$  Hz, 2H), 2.65 (s, 3H), 2.22 (s, 3H), 2.07 (s, 3H), 1.79 (s, 3H), 1.76 (s, 3H).  $^{13}\text{C}$  NMR (101 MHz,  $\text{CDCl}_3$ )  $\delta$  171.14, 170.47, 170.40, 170.29, 153.30, 151.38, 149.36, 144.13, 131.15, 131.10, 129.61, 128.64, 127.35, 122.04, 121.59, 107.54, 105.39, 71.84, 70.09, 68.84, 68.55, 68.17, 62.00, 56.31, 56.14, 20.98, 20.94, 20.88, 20.63. HRMS (ESI)  $m/z$ :  $[\text{M}+\text{H}]^+$  Calcd for  $\text{C}_{28}\text{H}_{29}\text{NO}_9$  524.1915; Found 524.1919.

**(2R,3S,4R,5S,6R)-2-(acetoxymethyl)-6-(phenanthridin-6-yl)tetrahydro-2H-pyran-3,4,5-triyl triacetate**

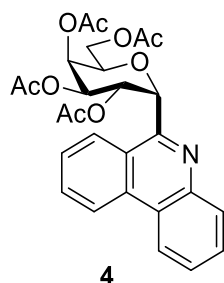

According to the general procedure from **1a** (0.1 mmol, 41 mg) and **2b** (0.15 mmol, 27 mg), **3** (35 mg, 69%) was obtained as white solid. Flash column chromatography eluent, Petroleum ether: ethyl acetate = 3:1 - 2:1, reaction time = 12 h.  $[\alpha]_{\text{D}}^{20} = +67.4$  (c 0.27,  $\text{CHCl}_3$ )  $^1\text{H}$  NMR (400 MHz,  $\text{CDCl}_3$ )  $\delta$  8.68 (dt,  $J = 8.3, 0.7$  Hz, 1H), 8.63 – 8.56 (m, 1H), 8.37 – 8.31 (m, 1H), 8.31 – 8.25 (m, 1H), 7.86 (ddd,  $J = 8.3, 7.0, 1.3$  Hz, 1H), 7.81 – 7.73 (m, 1H), 7.76 – 7.66 (m, 2H), 6.90 (dd,  $J = 10.4, 3.6$  Hz, 1H), 6.37 (d,  $J = 6.4$  Hz, 1H), 5.79 (dd,  $J = 10.5, 6.3$  Hz, 1H), 5.62 (dd,  $J = 3.7, 1.6$  Hz, 1H), 4.41 (td,  $J = 6.6, 1.6$  Hz, 1H), 4.10 – 3.98 (m, 2H), 2.22 (s, 3H), 2.07 (s, 3H), 1.80 (s, 3H), 1.76 (s, 3H).  $^{13}\text{C}$  NMR (101 MHz,  $\text{CDCl}_3$ )  $\delta$  170.97, 170.52, 170.43, 170.29, 154.35, 142.31, 133.44, 131.20, 130.73, 128.93, 127.94, 127.67, 126.03, 125.49, 124.07, 122.64, 122.00, 71.33, 69.75, 68.70, 68.48, 68.37, 61.84, 21.01, 20.88, 20.66. HRMS (ESI)  $m/z$ :  $[\text{M}+\text{H}]^+$  Calcd for  $\text{C}_{27}\text{H}_{27}\text{NO}_9$  510.1759; Found 510.1756.

**(2R,3S,4R,5S,6R)-2-(acetoxymethyl)-6-(1-chloro-8,9-dimethoxyphenanthridin-6-yl)tetrahydro-2H-pyran-3,4,5-triyl triacetate**



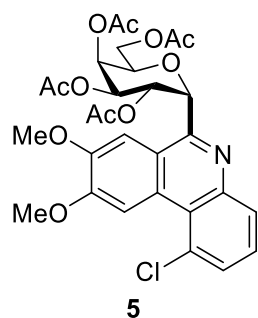

According to the general procedure from **1a** (0.1 mmol, 41 mg) and **2c** (0.15 mmol, 41 mg), **5** (45 mg, 75%) was obtained as white solid. Flash column chromatography eluent, Petroleum ether: ethyl acetate = 3:1 - 2:1, reaction time = 24 h.  $[\alpha]_D^{20} = +82.4$  (c 0.3,  $\text{CHCl}_3$ ).  $^1\text{H NMR}$  (400 MHz,  $\text{CDCl}_3$ )  $\delta$  9.42 (s, 1H), 8.20 (dd,  $J = 8.1, 1.5$  Hz, 1H), 7.74 (dd,  $J = 7.7, 1.5$  Hz, 1H), 7.68 (s, 1H), 7.58 (t,  $J = 7.9$  Hz, 1H), 6.90 (dd,  $J = 10.7, 3.7$  Hz, 1H), 6.29 (d,  $J = 6.4$  Hz, 1H), 5.75 (dd,  $J = 10.7, 6.4$  Hz, 1H), 5.59 (dd,  $J = 3.7, 1.5$  Hz, 1H), 4.31 (ddd,  $J = 7.1, 6.1, 1.4$  Hz, 1H), 4.12 (s, 3H), 4.06 (s, 4H), 4.11 – 3.97 (m, 2H), 2.21 (s, 3H), 2.07 (s, 3H), 1.79 (s, 6H).  $^{13}\text{C NMR}$  (101 MHz,  $\text{CDCl}_3$ )  $\delta$  171.14, 170.47, 170.40, 170.29, 153.30, 151.38, 149.36, 144.13, 131.15, 131.10, 129.61, 128.64, 127.35, 122.04, 121.59, 107.54, 105.39, 71.84, 70.09, 68.84, 68.55, 68.17, 62.00, 56.31, 56.14, 20.98, 20.94, 20.88, 20.63. HRMS (ESI)  $m/z$ :  $[\text{M}+\text{H}]^+$  Calcd for  $\text{C}_{29}\text{H}_{30}\text{ClNO}_{11}$  604.1580; Found 604.1579.

**(2R,3S,4R,5S,6R)-2-(acetoxymethyl)-6-(3,8,9-trimethoxyphenanthridin-6-yl)tetrahydro-2H-pyran-3,4,5-triyl triacetate**

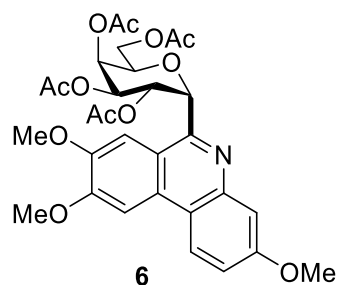

According to the general procedure from **1a** (0.1 mmol, 41 mg) and **2d** (0.15 mmol, 41 mg), **6** (49 mg, 81%) was obtained as white solid. Flash column chromatography eluent, Petroleum ether: ethyl acetate = 3:1 - 2:1, reaction time = 12 h.  $[\alpha]_D^{20} = +85.3$  (c 0.33,  $\text{CHCl}_3$ ).  $^1\text{H NMR}$  (400 MHz,  $\text{CDCl}_3$ )  $\delta$  8.33 (d,  $J = 9.2$  Hz, 1H), 7.82 (s, 1H), 7.56 (d,

$J = 2.8$  Hz, 2H), 7.30 (dd,  $J = 9.0, 2.8$  Hz, 1H), 6.85 (dd,  $J = 10.6, 3.7$  Hz, 1H), 6.29 (d,  $J = 6.5$  Hz, 1H), 5.75 (dd,  $J = 10.5, 6.5$  Hz, 1H), 5.64 (dd,  $J = 3.8, 1.5$  Hz, 1H), 4.54 – 4.46 (m, 1H), 4.12 (s, 3H), 4.09 – 3.99 (m, 2H), 4.03 (s, 3H), 4.02 (s, 3H), 2.21 (s, 3H), 2.06 (s, 3H), 1.81 (s, 3H), 1.77 (s, 3H).  $^{13}\text{C}$  NMR (101 MHz,  $\text{CDCl}_3$ )  $\delta$  171.16, 170.52, 170.45, 170.30, 159.68, 153.30, 152.61, 148.98, 143.69, 129.65, 122.74, 119.93, 118.89, 117.99, 110.30, 105.35, 101.75, 71.58, 69.87, 68.84, 68.65, 68.33, 62.02, 56.17, 55.82, 21.02, 20.95, 20.88, 20.67. HRMS (ESI)  $m/z$ :  $[\text{M}+\text{H}]^+$  Calcd for  $\text{C}_{30}\text{H}_{33}\text{NO}_{12}$  600.2076; Found 600.2077.

**(2R,3S,4R,5S,6R)-2-(acetoxymethyl)-6-(1,3-dichloro-8,9-dimethoxyphenanthridin-6-yl)tetrahydro-2H-pyran-3,4,5-triyl triacetate**

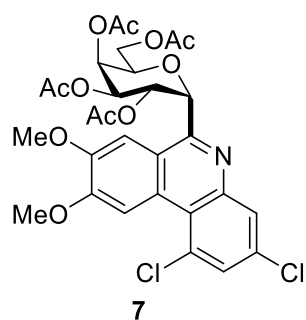

According to the general procedure from **1a** (0.1 mmol, 41 mg) and **2e** (0.15 mmol, 46 mg), **7** (32 mg, 50%) was obtained as white solid. Flash column chromatography eluent, Petroleum ether: ethyl acetate = 3:1 - 2:1, reaction time = 24 h.  $[\alpha]_{\text{D}}^{20} = +72.3$  (c 0.26,  $\text{CHCl}_3$ ).  $^1\text{H}$  NMR (400 MHz,  $\text{CDCl}_3$ )  $\delta$  8.31 (d,  $J = 2.2$  Hz, 1H), 7.83 – 7.78 (m, 2H), 7.59 (s, 1H), 6.89 (dd,  $J = 10.8, 3.6$  Hz, 1H), 6.36 (d,  $J = 6.7$  Hz, 1H), 5.73 (dd,  $J = 10.7, 6.7$  Hz, 1H), 5.68 (dd,  $J = 3.7, 1.5$  Hz, 1H), 4.78 (td,  $J = 6.5, 1.5$  Hz, 1H), 4.16 (s, 3H), 4.06 (s, 3H), 4.09 – 3.99 (m, 2H), 2.21 (s, 3H), 2.03 (s, 3H), 1.85 (s, 3H), 1.72 (s, 3H).  $^{13}\text{C}$  NMR (101 MHz,  $\text{CDCl}_3$ )  $\delta$  171.32, 170.52, 170.50, 170.03, 154.01, 153.10, 150.79, 137.34, 136.71, 132.71, 128.63, 128.25, 125.80, 121.41, 120.03, 105.26, 102.59, 71.19, 70.07, 69.02, 68.53, 68.26, 62.30, 56.46, 56.35, 20.94, 20.89, 20.73. HRMS (ESI)  $m/z$ :  $[\text{M}+\text{H}]^+$  Calcd for  $\text{C}_{29}\text{H}_{29}\text{Cl}_2\text{NO}_{11}$  638.1190; Found 638.1192.

**(2R,3S,4R,5S,6R)-2-(acetoxymethyl)-6-(8,9-dimethoxyphenanthridin-6-yl)tetrahydro-2H-pyran-3,4,5-triyl triacetate**

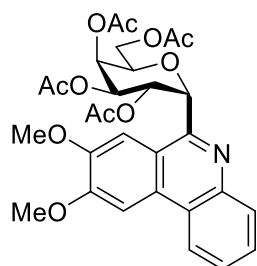

**8**

According to the general procedure from **1a** (0.1 mmol, 41 mg) and **2f** (0.15 mmol, 36 mg), **8** (50 mg, 87%) was obtained as white solid. Flash column chromatography eluent, Petroleum ether: ethyl acetate = 3:1 - 2:1, reaction time = 12 h.  $[\alpha]_D^{20} = +91.2$  (c 0.35,  $\text{CHCl}_3$ ).  $^1\text{H NMR}$  (400 MHz,  $\text{CDCl}_3$ )  $\delta$  8.48 – 8.42 (m, 1H), 8.27 – 8.21 (m, 1H), 7.94 (s, 1H), 7.69 (td,  $J = 7.2, 1.6$  Hz, 2H), 7.62 (s, 1H), 6.92 (dd,  $J = 10.7, 3.6$  Hz, 1H), 6.31 (d,  $J = 6.5$  Hz, 1H), 5.76 (dd,  $J = 10.7, 6.4$  Hz, 1H), 5.62 (dd,  $J = 3.8, 1.5$  Hz, 1H), 4.41 (td,  $J = 6.5, 1.5$  Hz, 1H), 4.14 (s, 3H), 4.05 (s, 3H), 4.12 – 3.96 (m, 2H), 2.21 (s, 3H), 2.07 (s, 3H), 1.80 (s, 3H), 1.78 (s, 3H).  $^{13}\text{C NMR}$  (101 MHz,  $\text{CDCl}_3$ )  $\delta$  171.20, 170.50, 170.44, 170.27, 152.73, 152.48, 149.73, 142.06, 131.26, 129.30, 128.01, 127.40, 123.79, 121.51, 120.89, 105.50, 102.31, 71.75, 69.92, 68.90, 68.65, 68.30, 62.01, 56.24, 21.00, 20.96, 20.90, 20.66. HRMS (ESI)  $m/z$ :  $[\text{M}+\text{H}]^+$  Calcd for  $\text{C}_{29}\text{H}_{31}\text{NO}_{11}$  570.1970; Found 570.1978.

**(2R,3S,4R,5S,6R)-2-(acetoxymethyl)-6-(3-chloro-8,9-dimethoxyphenanthridin-6-yl)tetrahydro-2H-pyran-3,4,5-triyl triacetate**

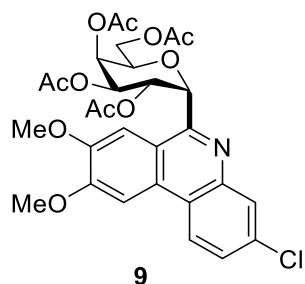

**9**

According to the general procedure from **1a** (0.1 mmol, 41 mg) and **2g** (0.15 mmol, 41 mg), **9** (44 mg, 72%) was obtained as white solid. Flash column chromatography eluent,

Petroleum ether: ethyl acetate = 3:1 - 2:1, reaction time = 12 h.  $[\alpha]_D^{20} = +91.2$  (c 0.35,  $\text{CHCl}_3$ ).  $[\alpha]_D^{20} = +107.4$  (c 0.2,  $\text{CHCl}_3$ ).  $^1\text{H NMR}$  (400 MHz,  $\text{CDCl}_3$ )  $\delta$  8.37 (d,  $J = 8.9$  Hz, 1H), 8.23 (d,  $J = 2.2$  Hz, 1H), 7.86 (s, 1H), 7.65 – 7.56 (m, 2H), 6.82 (dd,  $J = 10.6$ , 3.7 Hz, 1H), 6.29 (d,  $J = 6.6$  Hz, 1H), 5.75 (dd,  $J = 10.7$ , 6.4 Hz, 1H), 5.62 (dd,  $J = 3.7$ , 1.5 Hz, 1H), 4.35 (td,  $J = 6.5$ , 1.5 Hz, 1H), 4.14 (s, 3H), 4.11 – 3.97 (m, 2H), 4.05 (s, 3H), 2.21 (s, 3H), 2.07 (s, 3H), 1.81 (s, 3H), 1.79 (s, 3H).  $^{13}\text{C NMR}$  (101 MHz,  $\text{CDCl}_3$ )  $\delta$  171.18, 170.47, 170.42, 170.29, 154.06, 152.87, 149.98, 142.69, 133.70, 130.10, 129.05, 127.99, 122.99, 122.30, 120.87, 105.62, 102.20, 71.72, 69.99, 68.77, 68.53, 68.25, 61.92, 56.31, 56.28, 20.99, 20.95, 20.88, 20.65. HRMS (ESI)  $m/z$ :  $[\text{M}+\text{H}]^+$  Calcd for  $\text{C}_{29}\text{H}_{30}\text{ClNO}_{11}$  604.1580; Found 604.1581.

**(2R,3S,4R,5S,6R)-2-(acetoxymethyl)-6-(1-fluoro-8,9-dimethoxyphenanthridin-6-yl)tetrahydro-2H-pyran-3,4,5-triyl triacetate**

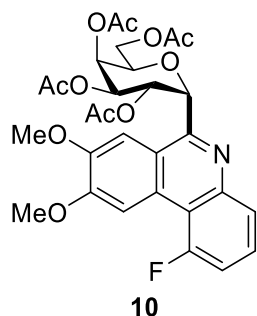

According to the general procedure from **1a** (0.1 mmol, 41 mg) and **2h** (0.15 mmol, 39 mg), **10** (48 mg, 82%) was obtained as white solid. Flash column chromatography eluent, Petroleum ether: ethyl acetate = 3:1 - 2:1, reaction time = 12 h.  $[\alpha]_D^{20} = +91.2$  (c 0.35,  $\text{CHCl}_3$ ).  $[\alpha]_D^{20} = +89.9$  (c 0.27,  $\text{CHCl}_3$ ).  $^1\text{H NMR}$  (400 MHz,  $\text{CDCl}_3$ )  $\delta$  8.47 (d,  $J = 5.3$  Hz, 1H), 8.07 (dd,  $J = 8.3$ , 1.4 Hz, 1H), 7.67 (s, 1H), 7.62 (td,  $J = 8.1$ , 5.5 Hz, 1H), 7.38 (ddd,  $J = 13.4$ , 7.9, 1.3 Hz, 1H), 6.88 (dd,  $J = 10.6$ , 3.7 Hz, 1H), 6.30 (d,  $J = 6.4$  Hz, 1H), 5.76 (dd,  $J = 10.6$ , 6.4 Hz, 1H), 5.60 (dd,  $J = 3.7$ , 1.5 Hz, 1H), 4.35 (ddd,  $J = 7.2$ , 6.2, 1.5 Hz, 1H), 4.12 (s, 3H), 4.06 (s, 3H), 4.09 – 3.98 (m, 2H), 2.21 (s, 3H), 2.07 (s, 3H), 1.79 (s, 3H), 1.79 (s, 3H).  $^{13}\text{C NMR}$  (101 MHz,  $\text{CDCl}_3$ )  $\delta$  171.16, 170.48, 170.42, 170.28, 159.88 (d,  $J_f = 253.4$  Hz), 153.69, 152.39, 149.54, 149.52, 144.00 (d,  $J_4 = 2.7$  Hz), 127.39, 127.32, 127.28, 127.24, 127.21, 121.44, 113.90 (d,  $J_3$

= 8.6 Hz), 113.54 (d,  $J_2 = 24.1$  Hz), 107.49 (d,  $J_2 = 23.6$  Hz), 105.42, 71.79, 70.07, 68.85, 68.57, 68.21, 62.01, 56.21, 56.15, 20.99, 20.94, 20.89, 20.64. HRMS (ESI)  $m/z$ :  $[M+H]^+$  Calcd for  $C_{29}H_{30}FNO_{11}$  588.1876; Found 588.1872.

**(2R,3S,4R,5S,6R)-2-(acetoxymethyl)-6-(1-cyano-8,9-dimethoxyphenanthridin-6-yl)tetrahydro-2H-pyran-3,4,5-triyl triacetate**

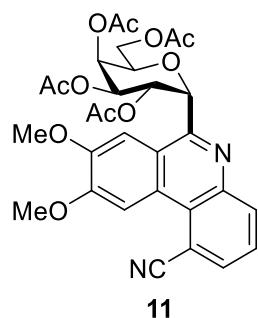

According to the general procedure from **1a** (0.1 mmol, 41 mg) and **2i** (0.15 mmol, 40 mg), **11** (33 mg, 56%) was obtained as white solid. Flash column chromatography eluent, Petroleum ether: ethyl acetate = 3:1 - 2:1, reaction time = 24 h.  $[\alpha]_D^{20} = +91.2$  (c 0.35,  $CHCl_3$ ).  $[\alpha]_D^{20} = +112.0$  (c 0.2,  $CHCl_3$ ).  $^1H$  NMR (400 MHz,  $CDCl_3$ )  $\delta$  9.23 (s, 1H), 8.48 (dd,  $J = 8.2, 1.5$  Hz, 1H), 8.08 (dd,  $J = 7.3, 1.6$  Hz, 1H), 7.73 (dd,  $J = 8.3, 7.3$  Hz, 1H), 7.69 (s, 1H), 6.84 (dd,  $J = 10.8, 3.7$  Hz, 1H), 6.30 (d,  $J = 6.4$  Hz, 1H), 5.75 (dd,  $J = 10.6, 6.4$  Hz, 1H), 5.59 (dd,  $J = 3.7, 1.5$  Hz, 1H), 4.30 (ddd,  $J = 7.2, 6.1, 1.5$  Hz, 1H), 4.17 (s, 3H), 4.08 (s, 3H), 4.11 – 3.95 (m, 2H), 2.21 (s, 3H), 2.07 (s, 3H), 1.79 (s, 3H), 1.79 (s, 3H).  $^{13}C$  NMR (101 MHz,  $CDCl_3$ )  $\delta$  171.07, 170.45, 170.39, 170.33, 154.51, 152.76, 150.52, 142.37, 137.07, 136.40, 127.73, 127.10, 124.13, 122.04, 121.39, 106.13, 105.61, 104.98, 71.78, 70.20, 68.72, 68.45, 68.08, 61.96, 56.79, 56.28, 20.96, 20.91, 20.86, 20.62. HRMS (ESI)  $m/z$ :  $[M+H]^+$  Calcd for  $C_{30}H_{30}N_2O_{11}$  595.1922; Found 595.1923.

**(2R,3S,4R,5S,6R)-2-(acetoxymethyl)-6-(pyrrolo[1,2-a]quinoxalin-4-yl)tetrahydro-2H-pyran-3,4,5-triyl triacetate**

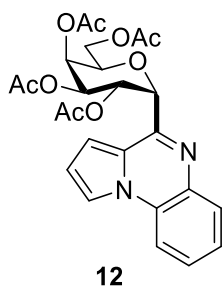

According to the general procedure from **1a** (0.1 mmol, 41 mg) and **2j** (0.15 mmol, 25 mg), **12** (30 mg, 60%) was obtained as white solid. Flash column chromatography eluent, Petroleum ether: ethyl acetate = 3:1 - 2:1, reaction time = 24 h.  $[\alpha]_{\text{D}}^{20} = +91.2$  (c 0.35,  $\text{CHCl}_3$ ).  $[\alpha]_{\text{D}}^{20} = +107.7$  (c 0.27,  $\text{CHCl}_3$ ).  $^1\text{H}$  NMR (400 MHz,  $\text{CDCl}_3$ )  $\delta$  8.05 (dd,  $J = 8.0, 1.5$  Hz, 1H), 7.94 (dd,  $J = 2.7, 1.3$  Hz, 1H), 7.85 (dd,  $J = 8.3, 1.4$  Hz, 1H), 7.55 (ddd,  $J = 8.3, 7.2, 1.6$  Hz, 1H), 7.47 (ddd,  $J = 8.6, 7.2, 1.3$  Hz, 1H), 6.92 (dd,  $J = 4.1, 1.3$  Hz, 1H), 6.86 (dd,  $J = 4.2, 2.7$  Hz, 1H), 6.45 (dd,  $J = 10.2, 3.5$  Hz, 1H), 5.81 (d,  $J = 6.5$  Hz, 1H), 5.73 – 5.64 (m, 2H), 5.10 (td,  $J = 6.6, 1.8$  Hz, 1H), 4.18 – 4.05 (m, 2H), 2.19 (s, 3H), 2.03 (s, 3H), 1.95 (s, 3H), 1.72 (s, 3H).  $^{13}\text{C}$  NMR (101 MHz,  $\text{CDCl}_3$ )  $\delta$  170.79, 170.63, 170.48, 170.16, 151.39, 134.95, 131.05, 128.38, 127.46, 126.14, 125.43, 114.83, 114.08, 113.80, 106.72, 71.44, 70.44, 68.58, 68.21, 61.91, 20.95, 20.87, 20.85, 20.80. HRMS (ESI)  $m/z$ :  $[\text{M}+\text{H}]^+$  Calcd for  $\text{C}_{25}\text{H}_{26}\text{N}_2\text{O}_9$  499.1711; Found 499.1706.

**(2R,3S,4R,5S,6R)-2-(acetoxymethyl)-6-(3-phenyl-[1,2,3]triazolo[1,5-a]quinoxalin-4-yl)tetrahydro-2H-pyran-3,4,5-triyl triacetate**

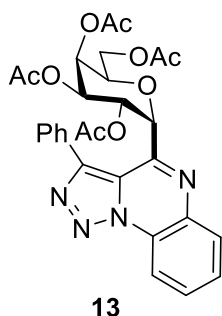

According to the general procedure from **1a** (0.1 mmol, 41 mg) and **2k** (0.15 mmol, 37 mg), **13** (27 mg, 47%) was obtained as white solid. Flash column chromatography eluent, Petroleum ether: ethyl acetate = 3:1 - 2:1, reaction time = 48 h.  $[\alpha]_{\text{D}}^{20} = +91.2$

(c 0.35, CHCl<sub>3</sub>).  $[\alpha]_D^{20} = + 57.0$  (c 0.33, CHCl<sub>3</sub>). <sup>1</sup>H NMR (400 MHz, CDCl<sub>3</sub>)  $\delta$  8.77 (dd,  $J = 8.3, 1.5$  Hz, 1H), 8.29 (dd,  $J = 8.0, 1.7$  Hz, 1H), 7.85 (ddd,  $J = 8.3, 7.3, 1.5$  Hz, 1H), 7.79 (ddd,  $J = 8.8, 7.3, 1.5$  Hz, 1H), 7.74 – 7.65 (m, 2H), 7.56 (dd,  $J = 4.9, 2.0$  Hz, 3H), 6.57 (dd,  $J = 10.2, 3.6$  Hz, 1H), 5.75 (d,  $J = 6.6$  Hz, 1H), 5.62 (dd,  $J = 3.6, 1.8$  Hz, 1H), 5.46 (dd,  $J = 10.2, 6.5$  Hz, 1H), 4.61 (td,  $J = 6.7, 1.8$  Hz, 1H), 4.06 (d,  $J = 6.7$  Hz, 2H), 2.15 (s, 3H), 1.99 (s, 3H), 1.95 (s, 3H), 1.76 (s, 3H). <sup>13</sup>C NMR (101 MHz, CDCl<sub>3</sub>)  $\delta$  170.55, 170.41, 170.24, 169.95, 149.77, 143.53, 135.19, 131.16, 130.76, 130.53, 130.07, 129.76, 129.23, 129.05, 125.78, 123.85, 115.88, 70.33, 69.86, 68.46, 68.00, 67.42, 61.57, 20.91, 20.84, 20.82, 20.74. HRMS (ESI)  $m/z$ :  $[M+H]^+$  Calcd for C<sub>29</sub>H<sub>28</sub>N<sub>4</sub>O<sub>9</sub> 577.1929; Found 577.1923.

**(2R,3S,4R,5S,6R)-2-(acetoxymethyl)-6-(7,9-difluorobenzo[c][2,6]naphthyridin-5-yl)tetrahydro-2H-pyran-3,4,5-triyl triacetate**

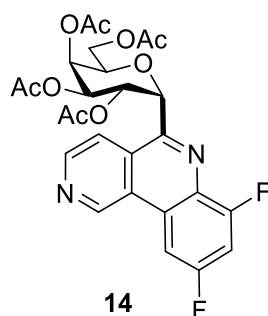

According to the general procedure from **1a** (0.1 mmol, 41 mg) and **2l** (0.15 mmol, 33 mg), **14** (36 mg, 66%) was obtained as white solid. Flash column chromatography eluent, Petroleum ether: ethyl acetate = 3:1 - 2:1, reaction time = 24 h.  $[\alpha]_D^{20} = + 91.2$  (c 0.35, CHCl<sub>3</sub>).  $[\alpha]_D^{20} = + 102.7$  (c 0.33, CHCl<sub>3</sub>). <sup>1</sup>H NMR (400 MHz, CDCl<sub>3</sub>)  $\delta$  9.09 (dd,  $J = 4.3, 1.6$  Hz, 1H), 8.79 (dd,  $J = 8.5, 1.7$  Hz, 1H), 7.94 (ddd,  $J = 9.4, 2.6, 1.6$  Hz, 1H), 7.80 (dd,  $J = 8.4, 4.3$  Hz, 1H), 7.33 (ddd,  $J = 9.3, 8.6, 2.6$  Hz, 1H), 7.09 (d,  $J = 6.8$  Hz, 1H), 6.38 (dd,  $J = 10.4, 3.4$  Hz, 1H), 5.93 (dd,  $J = 10.4, 6.8$  Hz, 1H), 5.75 (dd,  $J = 3.4, 1.8$  Hz, 1H), 5.44 (td,  $J = 6.6, 2.0$  Hz, 1H), 4.20 (dd,  $J = 11.2, 6.5$  Hz, 1H), 4.10 (dd,  $J = 11.3, 6.7$  Hz, 1H), 2.22 (s, 3H), 2.01 (s, 3H), 1.97 (s, 3H), 1.55 (s, 3H). <sup>13</sup>C NMR (101 MHz, CDCl<sub>3</sub>)  $\delta$  170.71, 170.59, 170.22, 170.07, 161.52 (dd,  $J_1 = 250.6, J_3 = 12.1$  Hz), 159.60 (dd,  $J_1 = 261.3, J_3 = 13.3$ ) 158.23, 151.39, 141.55, 131.05, 129.64,

129.61, 129.53, 127.09, 127.05, 127.01, 126.14, 126.12, 126.04, 126.02, 125.61, 105.37 (dd,  $J_2 = 28.2$ ,  $J_2 = 22.7$  Hz), 102.98 (dd,  $J_2 = 23.2$ ,  $J_4 = 5.0$  Hz), 70.33, 68.92, 68.29, 67.60, 62.34, 20.92, 20.91, 20.86, 20.68. HRMS (ESI)  $m/z$ :  $[M+H]^+$  Calcd for  $C_{26}H_{24}F_2N_2O_9$  547.1523; Found 547.1527.

**(2R,3S,4R,5S,6R)-2-((benzyloxy)methyl)-6-(1-chloro-8,9-dimethoxyphenanthridin-6-yl)tetrahydro-2H-pyran-3,4,5-triyl tribenzoate**

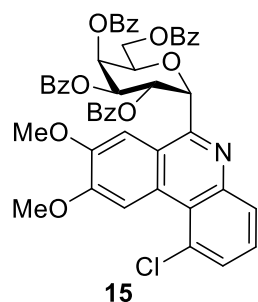

According to the general procedure from **1b** (0.1 mmol, 66 mg) and **2c** (0.15 mmol, 41 mg), **15** (72 mg, 85%) was obtained as white solid. Flash column chromatography eluent, Petroleum ether: ethyl acetate = 3:1 - 2:1, reaction time = 24 h.  $[\alpha]_D^{20} = +91.2$  (c 0.35,  $CHCl_3$ ).  $[\alpha]_D^{20} = +90.0$  (c 0.3,  $CHCl_3$ ).  $^1H$  NMR (400 MHz,  $CDCl_3$ )  $\delta$  9.37 (s, 1H), 8.44 (dd,  $J = 8.0$ , 1.5 Hz, 1H), 8.24 – 8.16 (m, 2H), 7.92 – 7.81 (m, 4H), 7.81 – 7.74 (m, 2H), 7.70 – 7.61 (m, 3H), 7.62 – 7.51 (m, 4H), 7.50 – 7.41 (m, 2H), 7.41 – 7.32 (m, 1H), 7.31 – 7.17 (m, 6H), 6.53 (d,  $J = 6.4$  Hz, 1H), 6.35 (dd,  $J = 10.5$ , 6.2 Hz, 1H), 6.07 (dd,  $J = 3.9$ , 1.2 Hz, 1H), 4.56 (dd,  $J = 11.4$ , 7.9 Hz, 1H), 4.32 (ddd,  $J = 7.9$ , 4.3, 1.2 Hz, 1H), 4.25 (dd,  $J = 11.4$ , 4.4 Hz, 1H), 4.10 (s, 3H), 3.93 (s, 3H).  $^{13}C$  NMR (101 MHz,  $CDCl_3$ )  $\delta$  166.50, 165.98, 165.93, 152.91, 151.36, 149.37, 144.23, 133.68, 133.25, 133.19, 133.15, 131.24, 131.22, 130.20, 129.88, 129.84, 129.70, 129.65, 129.56, 129.47, 129.45, 129.35, 128.81, 128.69, 128.41, 128.30, 127.49, 122.02, 121.76, 107.43, 105.63, 73.04, 70.88, 69.97, 69.41, 69.07, 63.26, 56.20, 55.95. HRMS (ESI)  $m/z$ :  $[M+H]^+$  Calcd for  $C_{49}H_{38}ClNO_{11}$  852.2206; Found 852.2208.

**(2R,3R,4R,5R,6R)-2-(acetoxymethyl)-6-(1-chloro-8,9-dimethoxyphenanthridin-6-yl)tetrahydro-2H-pyran-3,4,5-triyl triacetate**



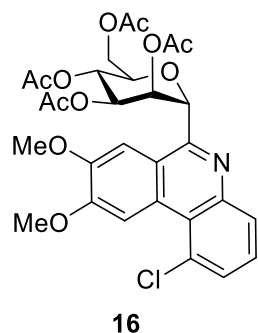

According to the general procedure from **1c** (0.1 mmol, 41 mg) and **2c** (0.15 mmol, 41 mg), **16** (46 mg, 77%) was obtained as white solid. Flash column chromatography eluent, Petroleum ether: ethyl acetate = 3:1 - 2:1, reaction time = 24 h.  $[\alpha]_D^{20} = +91.2$  (c 0.35,  $\text{CHCl}_3$ ).  $[\alpha]_D^{20} = +81.3$  (c 0.27,  $\text{CHCl}_3$ ).  $^1\text{H NMR}$  (400 MHz,  $\text{CDCl}_3$ )  $\delta$  9.41 (d,  $J = 1.3$  Hz, 1H), 8.26 (dd,  $J = 8.0, 1.5$  Hz, 1H), 7.91 (s, 1H), 7.74 (dd,  $J = 7.7, 1.4$  Hz, 1H), 7.59 (t,  $J = 7.9$  Hz, 1H), 6.44 – 6.36 (m, 2H), 5.82 (d,  $J = 1.5$  Hz, 1H), 5.43 (ddd,  $J = 11.5, 10.2, 1.6$  Hz, 1H), 4.21 (dd,  $J = 12.3, 5.8$  Hz, 1H), 4.12 (s, 3H), 4.08 (s, 3H), 3.94 (dd,  $J = 12.3, 2.1$  Hz, 1H), 3.42 (ddd,  $J = 10.2, 5.8, 2.1$  Hz, 1H), 2.29 (s, 3H), 2.09 (s, 3H), 1.96 (s, 3H), 1.90 (s, 3H).  $^{13}\text{C NMR}$  (101 MHz,  $\text{CDCl}_3$ )  $\delta$  170.73, 170.62, 170.22, 170.00, 153.18, 151.54, 149.25, 144.37, 131.36, 131.17, 129.56, 128.77, 127.55, 121.77, 121.05, 107.53, 106.08, 78.23, 72.26, 71.00, 70.32, 67.35, 62.69, 56.31, 21.38, 20.96, 20.83, 20.71. HRMS (ESI)  $m/z$ :  $[\text{M}+\text{H}]^+$  Calcd for  $\text{C}_{29}\text{H}_{30}\text{ClNO}_{11}$  604.1580; Found 604.1572.

**(2R,3S,4R,5S,6S)-2-(1-chloro-8,9-dimethoxyphenanthridin-6-yl)-6-(methoxycarbonyl)tetrahydro-2H-pyran-3,4,5-triyl triacetate**

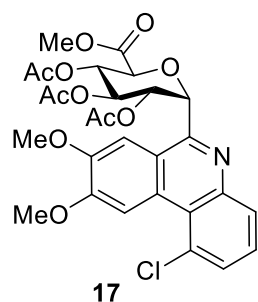

According to the general procedure from **1d** (0.1 mmol, 40 mg) and **2c** (0.15 mmol, 41 mg), **17** (41 mg, 70%) was obtained as white solid. Flash column chromatography

eluent, Petroleum ether: ethyl acetate = 3:1 - 2:1, reaction time = 24 h.  $[\alpha]_{\text{D}}^{20} = + 91.2$  (c 0.35,  $\text{CHCl}_3$ ).  $[\alpha]_{\text{D}}^{20} = + 18.8$  (c 0.29,  $\text{CHCl}_3$ ).  $^1\text{H NMR}$  (400 MHz,  $\text{CDCl}_3$ )  $\delta$  9.38 (s, 1H), 8.37 (s, 1H), 8.07 (dd,  $J = 8.1, 1.5$  Hz, 1H), 7.71 (dd,  $J = 7.6, 1.5$  Hz, 1H), 7.55 (t,  $J = 7.9$  Hz, 1H), 6.24 (d,  $J = 3.7$  Hz, 1H), 6.04 (t,  $J = 6.0$  Hz, 1H), 5.74 (dd,  $J = 6.2, 3.7$  Hz, 1H), 5.42 (t,  $J = 5.3$  Hz, 1H), 4.80 (d,  $J = 5.0$  Hz, 1H), 4.12 (s, 3H), 4.08 (s, 3H), 3.79 (s, 3H), 2.10 (s, 3H), 2.09 (s, 3H), 1.89 (s, 3H).  $^{13}\text{C NMR}$  (101 MHz,  $\text{CDCl}_3$ )  $\delta$  170.41, 169.84, 169.13, 169.05, 153.41, 151.34, 149.33, 144.37, 130.97, 130.65, 129.57, 128.71, 127.21, 122.22, 121.69, 107.24, 106.97, 77.36, 73.54, 71.85, 68.64, 68.30, 67.83, 56.49, 56.23, 52.79, 21.05, 20.95, 20.86. HRMS (ESI)  $m/z$ :  $[\text{M}+\text{H}]^+$  Calcd for  $\text{C}_{28}\text{H}_{28}\text{ClNO}_{11}$  590.1424; Found 590.1430.

**(2R,3R,4R,5S,6R)-2-(acetoxymethyl)-6-(1-chloro-8,9-dimethoxyphenanthridin-6-yl)tetrahydro-2H-pyran-3,4,5-triyl triacetate**

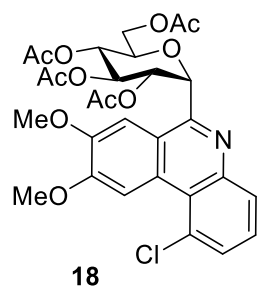

According to the general procedure from **1e** (0.1 mmol, 41 mg) and **2c** (0.15 mmol, 41 mg), **18** (40 mg, 66%) was obtained as white solid. Flash column chromatography eluent, Petroleum ether: ethyl acetate = 3:1 - 2:1, reaction time = 24 h.  $[\alpha]_{\text{D}}^{20} = + 91.2$  (c 0.35,  $\text{CHCl}_3$ ).  $[\alpha]_{\text{D}}^{20} = + 46.3$  (c 0.15,  $\text{CHCl}_3$ ).  $^1\text{H NMR}$  (400 MHz,  $\text{CDCl}_3$ )  $\delta$  9.43 (s, 1H), 8.28 (dd,  $J = 8.1, 1.5$  Hz, 1H), 7.76 (dd,  $J = 7.7, 1.5$  Hz, 1H), 7.70 (s, 1H), 7.60 (t,  $J = 7.9$  Hz, 1H), 7.03 (dd,  $J = 10.1, 9.0$  Hz, 1H), 6.21 (d,  $J = 6.2$  Hz, 1H), 5.48 (dd,  $J = 10.1, 6.3$  Hz, 1H), 5.22 (dd,  $J = 10.1, 8.9$  Hz, 1H), 4.19 (dd,  $J = 12.3, 4.8$  Hz, 1H), 4.13 (s, 3H), 4.08 (s, 3H), 3.94 (ddd,  $J = 10.1, 4.8, 2.2$  Hz, 1H), 3.89 (dd,  $J = 12.2, 2.3$  Hz, 1H), 2.09 (s, 3H), 2.02 (s, 3H), 1.94 (s, 3H), 1.82 (s, 3H).  $^{13}\text{C NMR}$  (101 MHz,  $\text{CDCl}_3$ )  $\delta$  170.94, 170.68, 170.54, 170.00, 152.84, 151.46, 149.45, 144.18, 131.28, 131.22, 129.60, 128.69, 127.39, 121.99, 121.60, 107.56, 105.38, 71.92, 71.20, 71.16,

70.80, 69.79, 62.24, 56.32, 56.24, 21.05, 20.87, 20.77. HRMS (ESI)  $m/z$ :  $[M+H]^+$   
Calcd for  $C_{29}H_{30}ClNO_{11}$  604.1580; Found 604.1582.

**(2R,3R,4R,5R,6S)-2-(1-chloro-8,9-dimethoxyphenanthridin-6-yl)-6-methyltetrahydro-2H-pyran-3,4,5-triyl tribenzoate**

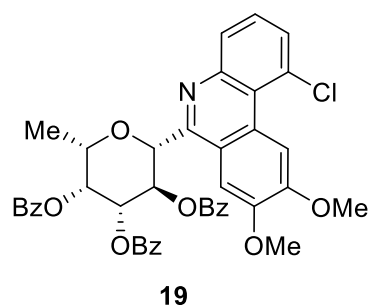

According to the general procedure from **1f** (0.1 mmol, 54 mg) and **2c** (0.15 mmol, 41 mg), **19** (62 mg, 84%) was obtained as white solid. Flash column chromatography eluent, Petroleum ether: ethyl acetate = 3:1 - 2:1, reaction time = 24 h.  $[\alpha]_D^{20} = +91.2$  (c 0.35,  $CHCl_3$ ).  $[\alpha]_D^{20} = +17.2$  (c 0.27,  $CHCl_3$ ).  $^1H$  NMR (400 MHz,  $CDCl_3$ )  $\delta$  9.36 (s, 1H), 8.34 (dd,  $J = 8.0, 1.5$  Hz, 1H), 8.19 – 8.12 (m, 2H), 7.95 (s, 1H), 7.82 (ddt,  $J = 14.6, 6.8, 1.4$  Hz, 4H), 7.69 (dd,  $J = 7.7, 1.5$  Hz, 1H), 7.61 – 7.50 (m, 2H), 7.45 (tt,  $J = 6.6, 1.5$  Hz, 2H), 7.40 – 7.30 (m, 2H), 7.26 – 7.15 (m, 4H), 6.76 (dd,  $J = 10.3, 3.7$  Hz, 1H), 6.69 (dd,  $J = 3.7, 1.6$  Hz, 1H), 5.91 (d,  $J = 1.8$  Hz, 1H), 5.76 (t,  $J = 10.0$  Hz, 1H), 4.05 (s, 3H), 3.98 (s, 3H), 3.54 (dq,  $J = 9.8, 6.1$  Hz, 1H), 1.16 (s, 3H).  $^{13}C$  NMR (101 MHz,  $CDCl_3$ )  $\delta$  166.25, 166.11, 165.81, 154.23, 151.53, 149.36, 144.59, 133.48, 133.32, 133.07, 131.36, 131.22, 130.20, 130.18, 129.90, 129.86, 129.83, 129.60, 129.50, 128.76, 128.74, 128.47, 128.41, 127.56, 121.87, 121.41, 107.57, 106.30, 77.99, 73.25, 72.58, 71.09, 70.31, 56.33, 56.30, 18.35. HRMS (ESI)  $m/z$ :  $[M+H]^+$  Calcd for  $C_{42}H_{34}ClNO_9$  732.1995; Found 732.1998.

**(2S,3S,4S,5R)-2-(acetoxymethyl)-5-(1-chloro-8,9-dimethoxyphenanthridin-6-yl)tetrahydrofuran-3,4-diyl diacetate**

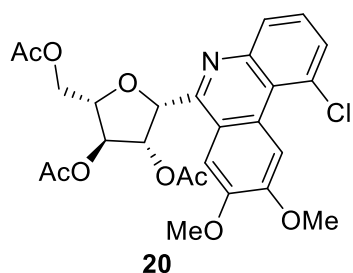

According to the general procedure from **1g** (0.1 mmol, 34 mg) and **2c** (0.15 mmol, 41 mg), **20** (39 mg, 73%) was obtained as white solid. Flash column chromatography eluent, Petroleum ether: ethyl acetate = 3:1 - 2:1, reaction time = 24 h.  $[\alpha]_D^{20} = +91.2$  (c 0.35,  $\text{CHCl}_3$ ).  $[\alpha]_D^{20} = +26.9$  (c 0.26,  $\text{CHCl}_3$ ).  $^1\text{H NMR}$  (400 MHz,  $\text{CDCl}_3$ )  $\delta$  9.42 (s, 0.24H,  **$\beta$ -isomer**), 9.40 (s, 1H), 8.08 (dd,  $J = 8.2, 1.5$  Hz, 1H), 8.09 – 8.05 (m, 0.25H,  **$\beta$ -isomer**), 7.94 (s, 0.25H,  **$\beta$ -isomer**), 7.91 (s, 1H), 7.70 (dd,  $J = 7.7, 1.3$  Hz, 1H), 7.70 (dd,  $J = 7.7, 1.3$  Hz, 0.25H,  **$\beta$ -isomer**), 7.54 (t,  $J = 7.9$  Hz, 1H), 7.54 (t,  $J = 7.9$  Hz, 0.25H,  **$\beta$ -isomer**), 6.22 (t,  $J = 9.9$  Hz, 0.25H,  **$\beta$ -isomer**), 5.97 – 5.92 (m, 1H), 5.76 (d,  $J = 2.8$  Hz, 1H), 5.71 (dd,  $J = 5.8, 2.8$  Hz, 1H), 5.58 – 5.52 (m, 0.25H,  **$\beta$ -isomer**), 5.49 (ddd,  $J = 7.9, 4.4, 3.3$  Hz, 1H), 5.39 (dd,  $J = 10.0, 3.7$  Hz, 0.25H,  **$\beta$ -isomer**), 5.11 (d,  $J = 9.8$  Hz, 0.25H,  **$\beta$ -isomer**), 4.28 (dd,  $J = 13.1, 2.1$  Hz, 0.25H,  **$\beta$ -isomer**), 4.22 – 4.13 (m, 1H), 4.12 (s, 1.5H), 4.12 (s, 3H), 4.08 (s, 3H), 4.03 (dd,  $J = 13.1, 1.3$  Hz, 0.25H,  **$\beta$ -isomer**), 3.96 (dd,  $J = 11.4, 8.7$  Hz, 1H), 2.21 (s, 3H), 2.20 (s, 0.75H), 2.11 (s, 3H), 2.06 (s, 0.75H), 1.83 (s, 3H), 1.69 (s, 0.75H).  $^{13}\text{C NMR}$  (101 MHz,  $\text{CDCl}_3$ )  $\delta$  170.53, 170.06, 169.83, 169.56, 169.26, 153.73, 153.16, 151.44, 151.29, 149.19, 148.98, 144.90, 144.73, 130.99, 130.90, 130.53, 130.51, 129.68, 129.65, 129.00, 128.84, 127.29, 121.83, 121.60, 121.54, 107.61, 107.50, 106.21, 106.02, 81.93, 76.44, 72.32, 69.72, 69.04, 67.89, 67.45, 66.58, 64.68, 56.25, 56.02, 55.88, 21.17, 21.05, 20.98, 20.93, 20.91, 20.71. HRMS (ESI)  $m/z$ :  $[\text{M}+\text{H}]^+$  Calcd for  $\text{C}_{26}\text{H}_{26}\text{ClNO}_9$  532.1369; Found 532.1370.

**1-chloro-6-((3aR,4R,6R,6aS)-6-((R)-2,2-dimethyl-1,3-dioxolan-4-yl)-2,2-dimethyltetrahydrofuro[3,4-d][1,3]dioxol-4-yl)-8,9-dimethoxyphenanthridine**

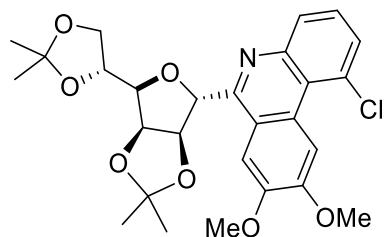

**21**

According to the general procedure from **1h** (0.1 mmol, 32 mg) and **2c** (0.15 mmol, 41 mg), **21** (36 mg, 69%) was obtained as white solid. Flash column chromatography eluent, Petroleum ether: ethyl acetate = 3:1 - 2:1, reaction time = 24 h.  $[\alpha]_{\text{D}}^{20} = +91.2$  (c 0.35,  $\text{CHCl}_3$ ).  $[\alpha]_{\text{D}}^{20} = +40.0$  (c 0.24,  $\text{CHCl}_3$ ).  $^1\text{H NMR}$  (400 MHz,  $\text{CDCl}_3$ )  $\delta$  9.38 (s, 1H), 8.03 (dd,  $J = 8.1, 1.5$  Hz, 1H), 7.76 (s, 1H), 7.69 (dd,  $J = 7.7, 1.5$  Hz, 1H), 7.53 (t,  $J = 7.9$  Hz, 1H), 5.89 (d,  $J = 6.0$  Hz, 1H), 5.82 (s, 1H), 5.06 (dd,  $J = 6.1, 3.9$  Hz, 1H), 4.46 (ddd,  $J = 7.6, 6.4, 4.8$  Hz, 1H), 4.12 (s, 3H), 4.11 – 4.08 (m, 1H), 4.07 (s, 3H), 3.93 (dd,  $J = 8.6, 4.8$  Hz, 1H), 3.80 (dd,  $J = 7.5, 3.9$  Hz, 1H), 1.65 (s, 3H), 1.49 (s, 3H), 1.33 (s, 3H), 1.32 (s, 3H).  $^{13}\text{C NMR}$  (101 MHz,  $\text{CDCl}_3$ )  $\delta$  155.26, 151.42, 149.29, 144.54, 130.71, 130.53, 129.72, 128.56, 127.09, 121.81, 121.37, 112.30, 109.19, 107.56, 106.08, 83.76, 83.18, 81.78, 81.42, 73.59, 67.05, 56.28, 26.88, 26.29, 25.36, 24.67. HRMS (ESI)  $m/z$ :  $[\text{M}+\text{H}]^+$  Calcd for  $\text{C}_{27}\text{H}_{30}\text{ClNO}_7$  516.1784; Found 516.1789.

**(R)-1-((3aS,4R,6R,6aR)-6-(1-chloro-8,9-dimethoxyphenanthridin-6-yl)-2,2-dimethyltetrahydrofuro[3,4-d][1,3]dioxol-4-yl)-2-hydroxyethyl acetate**

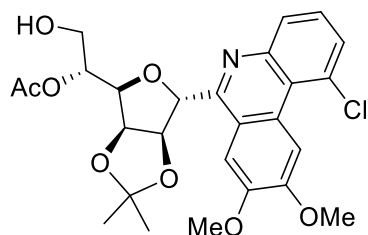

**22**

According to the general procedure from **1i** (0.1 mmol, 32 mg) and **2c** (0.15 mmol, 41 mg), **22** (23 mg, 45%) was obtained as white solid. Flash column chromatography eluent, Petroleum ether: ethyl acetate = 3:1 - 2:1, reaction time = 24 h.  $[\alpha]_{\text{D}}^{20} = +91.2$  (c 0.35,  $\text{CHCl}_3$ ).  $[\alpha]_{\text{D}}^{20} = +29.3$  (c 0.27  $\text{CHCl}_3$ ).  $^1\text{H NMR}$  (400 MHz,  $\text{CDCl}_3$ )  $\delta$  9.39 (s, 1H), 8.06 (dd,  $J = 8.2, 1.5$  Hz, 1H), 7.74 (s, 1H), 7.69 (d,  $J = 1.5$  Hz, 1H), 7.54 (t,  $J =$

7.9 Hz, 1H), 5.84 (s, 1H), 5.76 (d,  $J = 5.9$  Hz, 1H), 5.31 (ddd,  $J = 7.7, 4.5, 2.8$  Hz, 1H), 4.98 (dd,  $J = 6.0, 3.9$  Hz, 1H), 4.18 (dd,  $J = 8.1, 3.9$  Hz, 1H), 4.12 (s, 3H), 4.10 (s, 3H), 3.86 (dd,  $J = 11.3, 2.9$  Hz, 1H), 3.68 (dd,  $J = 11.4, 4.5$  Hz, 1H), 2.08 (s, 3H), 1.62 (s, 3H), 1.44 (s, 3H).  $^{13}\text{C}$  NMR (101 MHz,  $\text{CDCl}_3$ )  $\delta$  169.78, 155.10, 151.47, 149.32, 144.62, 130.77, 130.63, 129.74, 128.50, 127.13, 121.78, 121.06, 112.64, 107.60, 105.89, 84.00, 83.29, 81.09, 80.21, 69.95, 56.28, 33.62, 26.40, 24.99, 21.12. HRMS (ESI)  $m/z$ :  $[\text{M}+\text{H}]^+$  Calcd for  $\text{C}_{26}\text{H}_{28}\text{ClNO}_8$  518.1576; Found 518.1584.

**(2R,3R,4S,5R,6S)-2-((benzoyloxy)methyl)-6-(((2R,3R,4R,5S,6R)-3,4,5-tris(benzoyloxy)-6-(1-chloro-8,9-dimethoxyphenanthridin-6-yl)tetrahydro-2H-pyran-2-yl)methoxy)tetrahydro-2H-pyran-3,4,5-triyl tribenzoate**

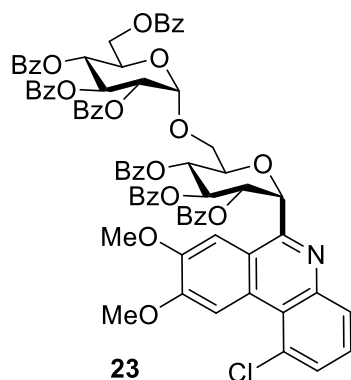

According to the general procedure from **1j** (0.1 mmol, 114 mg) and **2c** (0.15 mmol, 41 mg), **23** (58 mg, 44%) was obtained as white solid. Flash column chromatography eluent, Petroleum ether: ethyl acetate = 3:1 - 2:1, reaction time = 48 h.  $[\alpha]_{\text{D}}^{20} = +91.2$  (c 0.35,  $\text{CHCl}_3$ ).  $[\alpha]_{\text{D}}^{20} = +80.0$  (c 0.25,  $\text{CHCl}_3$ ).  $^1\text{H}$  NMR (400 MHz,  $\text{CDCl}_3$ )  $\delta$  9.36 (s, 1H), 8.49 (dd,  $J = 8.0, 1.5$  Hz, 1H), 8.17 (dd,  $J = 7.4, 2.4$  Hz, 2H), 8.07 (dd,  $J = 8.3, 1.3$  Hz, 2H), 7.99 – 7.89 (m, 4H), 7.81 (dddd,  $J = 26.7, 11.7, 8.0, 1.4$  Hz, 7H), 7.72 – 7.63 (m, 1H), 7.60 (d,  $J = 18.2$  Hz, 3H), 7.57 – 7.50 (m, 3H), 7.51 – 7.41 (m, 5H), 7.40 – 7.31 (m, 5H), 7.30 – 7.24 (m, 2H), 7.20 (td,  $J = 7.9, 7.5, 3.5$  Hz, 4H), 6.26 (d,  $J = 6.5$  Hz, 1H), 6.05 (dd,  $J = 3.5, 1.3$  Hz, 1H), 6.00 (dd,  $J = 10.6, 3.5$  Hz, 1H), 5.85 (t,  $J = 9.8$  Hz, 1H), 5.68 (dd,  $J = 10.6, 3.7$  Hz, 1H), 5.58 (dd,  $J = 10.0, 6.3$  Hz, 1H), 5.46 (d,  $J = 3.8$  Hz, 1H), 4.70 – 4.62 (m, 1H), 4.32 (d,  $J = 6.5$  Hz, 2H), 4.11 (t,  $J = 2.4$  Hz, 1H), 4.06

(s, 3H), 3.87 (s, 1H), 3.84 (s, 3H), 3.47 (dd,  $J = 11.6, 2.2$  Hz, 1H).  $^{13}\text{C}$  NMR (101 MHz,  $\text{CDCl}_3$ )  $\delta$  166.48, 166.33, 166.04, 165.92, 165.73, 165.40, 153.13, 151.54, 149.55, 144.33, 133.62, 133.40, 133.16, 133.11, 133.07, 131.27, 131.11, 130.16, 130.09, 129.94, 129.89, 129.86, 129.80, 129.77, 129.70, 129.64, 129.56, 129.42, 129.17, 128.77, 128.74, 128.67, 128.51, 128.49, 128.44, 128.37, 128.35, 127.43, 122.00, 121.70, 107.60, 105.51, 97.27, 72.19, 72.12, 71.88, 71.59, 69.79, 69.51, 69.43, 68.58, 67.21, 66.74, 62.84, 56.22, 56.09. HRMS (ESI)  $m/z$ :  $[\text{M}+\text{H}]^+$  Calcd for  $\text{C}_{76}\text{H}_{60}\text{ClNO}_{19}$  1326.3521; Found 1326.3532.

**(2R,3R,4S,5R,6S)-2-(acetoxymethyl)-6-(((2R,3R,4S,5S,6R)-4,5-diacetoxy-2-(acetoxymethyl)-6-(1-chloro-8,9-dimethoxyphenanthridin-6-yl)tetrahydro-2H-pyran-3-yl)oxy)tetrahydro-2H-pyran-3,4,5-triyl triacetate**

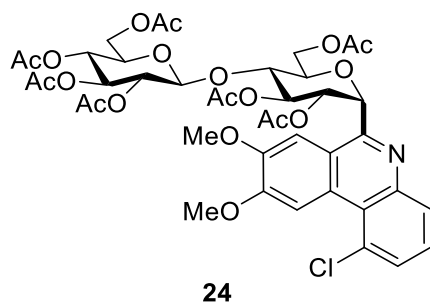

According to the general procedure from **1k** (0.1 mmol, 70 mg) and **2c** (0.15 mmol, 41 mg), **24** (36 mg, 40%) was obtained as white solid. Flash column chromatography eluent, Petroleum ether: ethyl acetate = 3:1 - 2:1, reaction time = 48 h.  $[\alpha]_{\text{D}}^{20} = +91.2$  (c 0.35,  $\text{CHCl}_3$ ).  $[\alpha]_{\text{D}}^{20} = +53.6$  (c 0.28,  $\text{CHCl}_3$ ).  $^1\text{H}$  NMR (400 MHz,  $\text{CDCl}_3$ )  $\delta$  9.41 (s, 1H), 8.28 (dd,  $J = 8.1, 1.5$  Hz, 1H), 7.75 (dd,  $J = 7.7, 1.5$  Hz, 1H), 7.71 (s, 1H), 7.62 (t,  $J = 7.9$  Hz, 1H), 6.99 (dd,  $J = 9.9, 8.6$  Hz, 1H), 6.06 (d,  $J = 6.2$  Hz, 1H), 5.38 (dd,  $J = 9.8, 6.1$  Hz, 1H), 5.13 (t,  $J = 9.3$  Hz, 1H), 5.05 (t,  $J = 9.7$  Hz, 1H), 4.91 (dd,  $J = 9.3, 7.9$  Hz, 1H), 4.61 (d,  $J = 7.9$  Hz, 1H), 4.28 (ddd,  $J = 12.5, 5.1, 3.3$  Hz, 2H), 4.12 (s, 3H), 4.09 (d,  $J = 7.0$  Hz, 1H), 4.07 (s, 3H), 3.94 (dd,  $J = 12.3, 2.4$  Hz, 1H), 3.87 (dd,  $J = 10.0, 8.6$  Hz, 1H), 3.78 (ddd,  $J = 9.9, 5.0, 2.1$  Hz, 1H), 3.60 (ddd,  $J = 9.8, 4.3, 2.4$  Hz, 1H), 2.11 (s, 3H), 2.01 (s, 3H), 2.00 (s, 3H), 1.96 (d,  $J = 1.0$  Hz, 6H), 1.91 (s, 3H), 1.83 (s, 3H).  $^{13}\text{C}$  NMR (101 MHz,  $\text{CDCl}_3$ )  $\delta$  171.08, 170.62, 170.42, 170.39, 169.93, 169.42,

169.10, 152.83, 151.39, 149.34, 144.20, 131.43, 131.22, 129.53, 128.68, 127.52, 121.91, 121.54, 107.53, 105.52, 100.69, 78.06, 73.27, 72.20, 71.99, 71.94, 71.79, 71.38, 70.21, 68.02, 62.10, 61.73, 56.31, 56.21, 29.83, 20.96, 20.93, 20.91, 20.69, 20.67. HRMS (ESI)  $m/z$ :  $[M+Na]^+$  Calcd for  $C_{41}H_{46}ClNO_{19}$  914.2245; Found 914.2250.

**(2R,3R,4S,5R,6R)-2-(acetoxymethyl)-6-(((2R,3R,4S,5S,6R)-4,5-diacetoxy-2-(acetoxymethyl)-6-(1-chloro-8,9-dimethoxyphenanthridin-6-yl)tetrahydro-2H-pyran-3-yl)oxy)tetrahydro-2H-pyran-3,4,5-triyl triacetate**

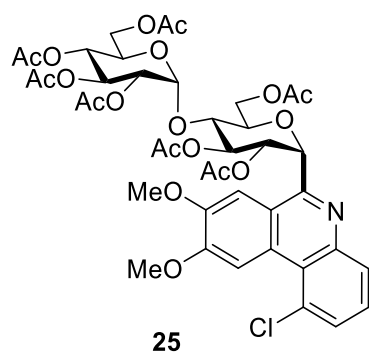

According to the general procedure from **11** (0.1 mmol, 70 mg) and **2c** (0.15 mmol, 41 mg), **25** (63 mg, 69%) was obtained as white solid. Flash column chromatography eluent, Petroleum ether: ethyl acetate = 3:1 - 2:1, reaction time = 48 h.  $[\alpha]_D^{20} = +91.2$  (c 0.35,  $CHCl_3$ ).  $[\alpha]_D^{20} = +112.1$  (c 0.45,  $CHCl_3$ ).  $^1H$  NMR (400 MHz,  $CDCl_3$ )  $\delta$  9.44 (s, 1H), 8.26 (dd,  $J = 8.0, 1.5$  Hz, 1H), 7.76 (dd,  $J = 7.7, 1.5$  Hz, 1H), 7.72 (s, 1H), 7.61 (t,  $J = 7.8$  Hz, 1H), 6.96 (dd,  $J = 9.7, 8.0$  Hz, 1H), 6.06 (d,  $J = 6.0$  Hz, 1H), 5.49 (d,  $J = 4.0$  Hz, 1H), 5.39 – 5.33 (m, 1H), 5.35 – 5.29 (m, 1H), 5.05 (t,  $J = 9.9$  Hz, 1H), 4.90 (dd,  $J = 10.5, 4.1$  Hz, 1H), 4.34 (dd,  $J = 12.1, 2.6$  Hz, 1H), 4.25 (dd,  $J = 12.4, 3.8$  Hz, 1H), 4.18 – 4.11 (m, 1H), 4.14 (s, 3H), 4.09 (s, 3H), 4.08 – 4.05 (m, 1H), 4.07 – 4.00 (m, 1H), 3.98 – 3.87 (m, 2H), 2.13 (s, 3H), 2.11 (s, 3H), 2.10 (s, 3H), 2.01 (s, 3H), 1.98 (s, 6H), 1.83 (s, 3H).  $^{13}C$  NMR (101 MHz,  $CDCl_3$ )  $\delta$  170.90, 170.59, 170.42, 170.05, 169.90, 169.46, 152.73, 151.28, 149.24, 144.19, 131.03, 130.99, 129.51, 128.58, 127.29, 121.75, 121.51, 107.46, 105.27, 95.55, 73.89, 73.15, 71.99, 71.45, 71.40, 69.98, 69.51, 68.35, 68.08, 62.76, 61.51, 56.16, 56.07, 21.11, 20.78, 20.72, 20.68, 20.61, 20.56. HRMS (ESI)  $m/z$ :  $[M+Na]^+$  Calcd for  $C_{41}H_{46}ClNO_{19}$  914.2245; Found 914.2249.



(2R,3R,4S,5R,6R)-2-(acetoxymethyl)-6-(((2R,3R,4S,5R,6R)-4,5-diacetoxy-2-(acetoxymethyl)-6-(((2R,3R,4S,5S,6R)-4,5-diacetoxy-2-(acetoxymethyl)-6-(1-chloro-8,9-dimethoxyphenanthridin-6-yl)tetrahydro-2H-pyran-3-yl)oxy)tetrahydro-2H-pyran-3-yl)oxy)tetrahydro-2H-pyran-3,4,5-triyl triacetate

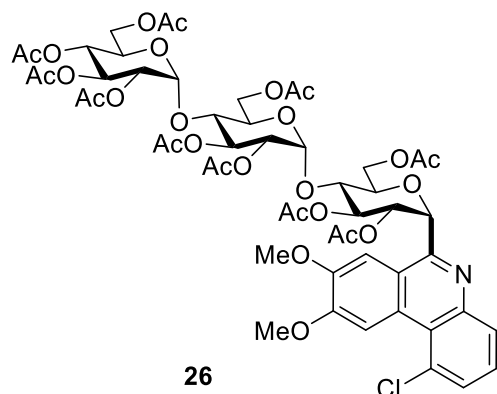

According to the general procedure from **1m** (0.1 mmol, 99 mg) and **2c** (0.15 mmol, 41 mg), **26** (43 mg, 36%) was obtained as white solid. Flash column chromatography eluent, Petroleum ether: ethyl acetate = 3:1 - 2:1, reaction time = 48 h.  $[\alpha]_D^{20} = +91.2$  (c 0.35,  $\text{CHCl}_3$ ).  $[\alpha]_D^{20} = +94.4$  (c 0.27,  $\text{CHCl}_3$ ).  $^1\text{H NMR}$  (400 MHz,  $\text{CDCl}_3$ )  $\delta$  8.26 (dd,  $J = 8.1, 1.6$  Hz, 1H), 7.75 (dd,  $J = 7.7, 1.5$  Hz, 1H), 7.71 (s, 1H), 7.61 (t,  $J = 7.9$  Hz, 1H), 6.91 (dd,  $J = 9.5, 7.9$  Hz, 1H), 6.04 (d,  $J = 6.0$  Hz, 1H), 5.39 – 5.36 (m, 3H), 5.35 – 5.33 (m, 1H), 5.30 (dd,  $J = 10.6, 9.5$  Hz, 1H), 5.04 (t,  $J = 9.8$  Hz, 1H), 4.80 (ddd,  $J = 19.8, 10.4, 4.1$  Hz, 2H), 4.47 (dd,  $J = 12.2, 2.0$  Hz, 1H), 4.35 (dd,  $J = 12.1, 2.7$  Hz, 1H), 4.27 – 4.20 (m, 2H), 4.20 – 4.12 (m, 1H), 4.13 (s, 3H), 4.08 (d,  $J = 2.6$  Hz, 3H), 4.07 – 4.04 (m, 1H), 4.03 (dd,  $J = 10.6, 1.8$  Hz, 1H), 3.97 – 3.94 (m, 1H), 3.95 – 3.90 (m, 2H), 3.89 – 3.87 (m, 1H).  $^{13}\text{C NMR}$  (101 MHz,  $\text{CDCl}_3$ )  $\delta$  171.01, 170.84, 170.72, 170.67, 170.58, 170.54, 170.12, 169.97, 169.78, 169.58, 152.86, 151.40, 149.40, 144.36, 131.24, 131.13, 129.60, 128.70, 127.47, 121.90, 121.64, 107.62, 105.38, 95.74, 74.76, 73.32, 72.60, 72.12, 72.04, 71.64, 71.53, 70.57, 70.15, 69.53, 68.94, 68.57, 68.06, 62.98, 62.47, 61.51, 56.30, 56.22, 21.23, 21.05, 20.98, 20.96, 20.85, 20.80, 20.77, 20.70. HRMS (ESI)  $m/z$ :  $[\text{M}+\text{Na}]^+$  Calcd for  $\text{C}_{53}\text{H}_{62}\text{ClNO}_{27}$  1202.3090; Found 1202.3092.

## 9. References

- (1) Gillard, J. W.; Israel, M. *Tetrahedron Lett.* **1981**, *22*, 513-516.
- (2) Thumbs, P.; Ensfelder, T. T.; Hillmeier, M.; Wagner, M.; Heiss, M.; Scheel, C.; Schön, A.; Müller, M.; Michalakis, S.; Kellner, S.; Carell, T. *Angew. Chem. Int. Ed.* **2020**, *59*, 12352-12356.
- (3) Tang, C.; Jiao, N. *J. Am. Chem. Soc.* **2012**, *134*, 18924-18927.
- (4) Klapars, A.; Antilla, J. C.; Huang, X.; Buchwald, S. L. *J. Am. Chem. Soc.* **2001**, *123*, 7727-7729.
- (5) Kamer, P. C. J.; Nolte, R. J. M.; Drenth, W. *J. Am. Chem. Soc.* **1988**, *110*, 6818-6825.
- (6) Tobisu, M.; Koh, K.; Furukawa, T.; Chatani, N. *Angew. Chem. Int. Ed.* **2012**, *51*, 11363-11366.
- (7) He, Z.; Bae, M.; Wu, J.; Jamison, T. F. *Angew. Chem. Int. Ed.* **2014**, *53*, 14451-14455.

## 10. NMR Spectra Data for the Products

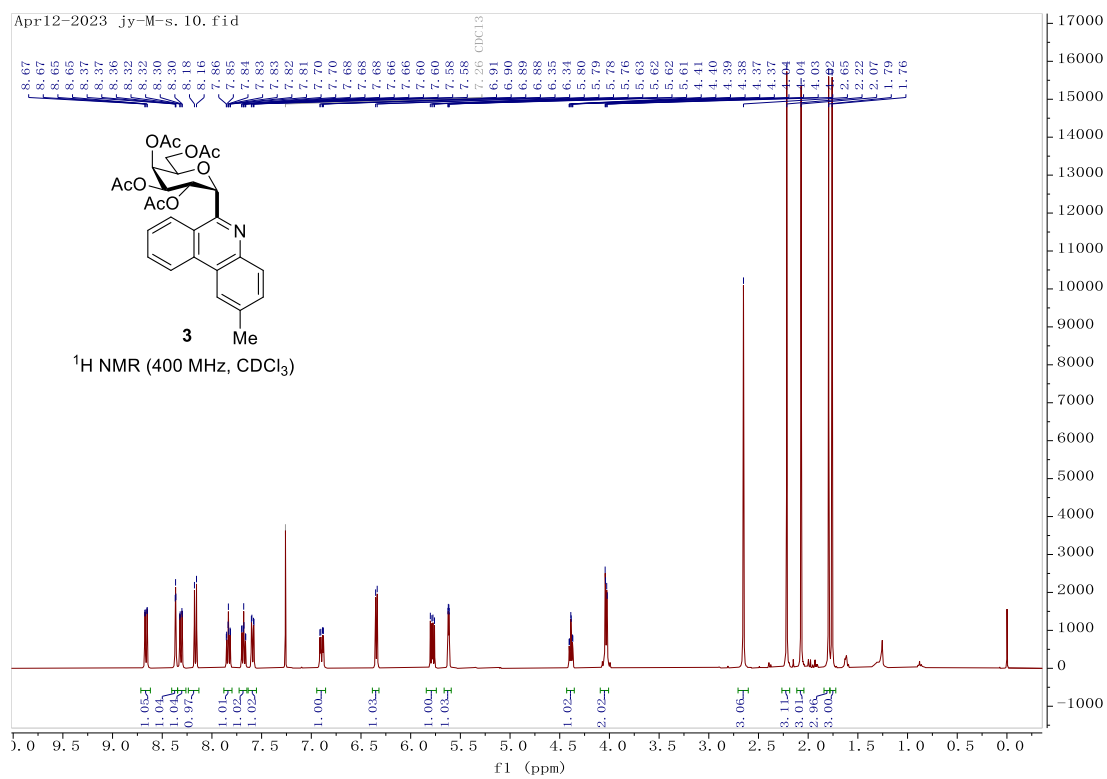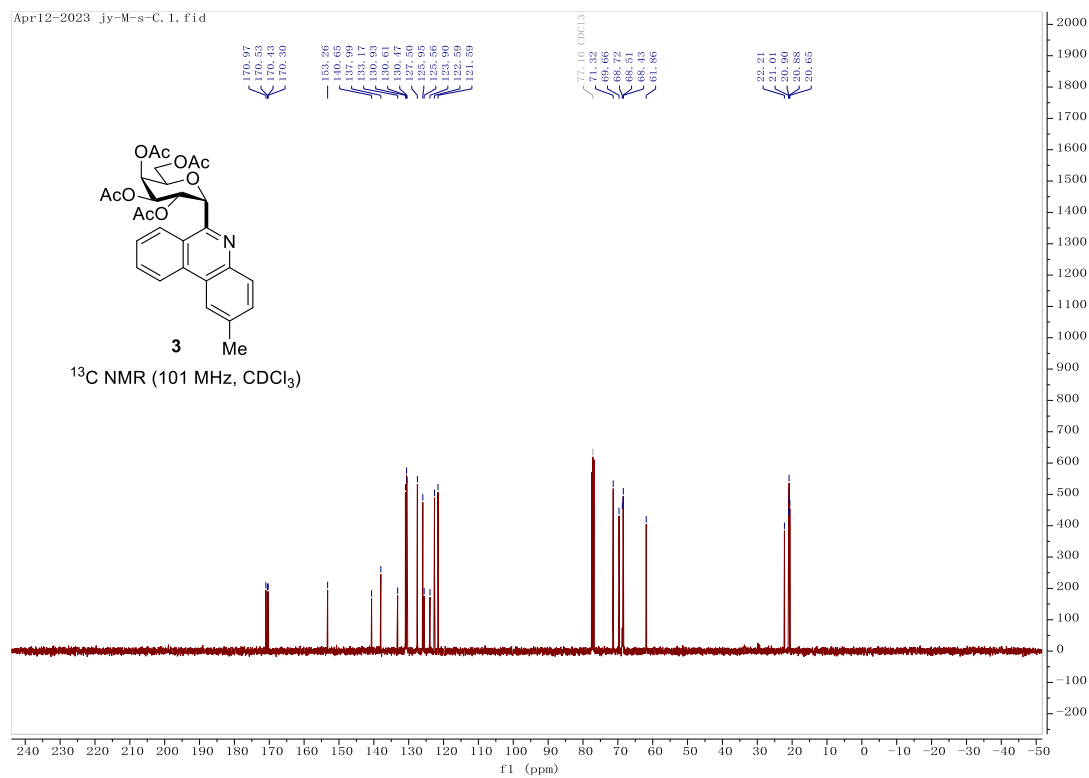

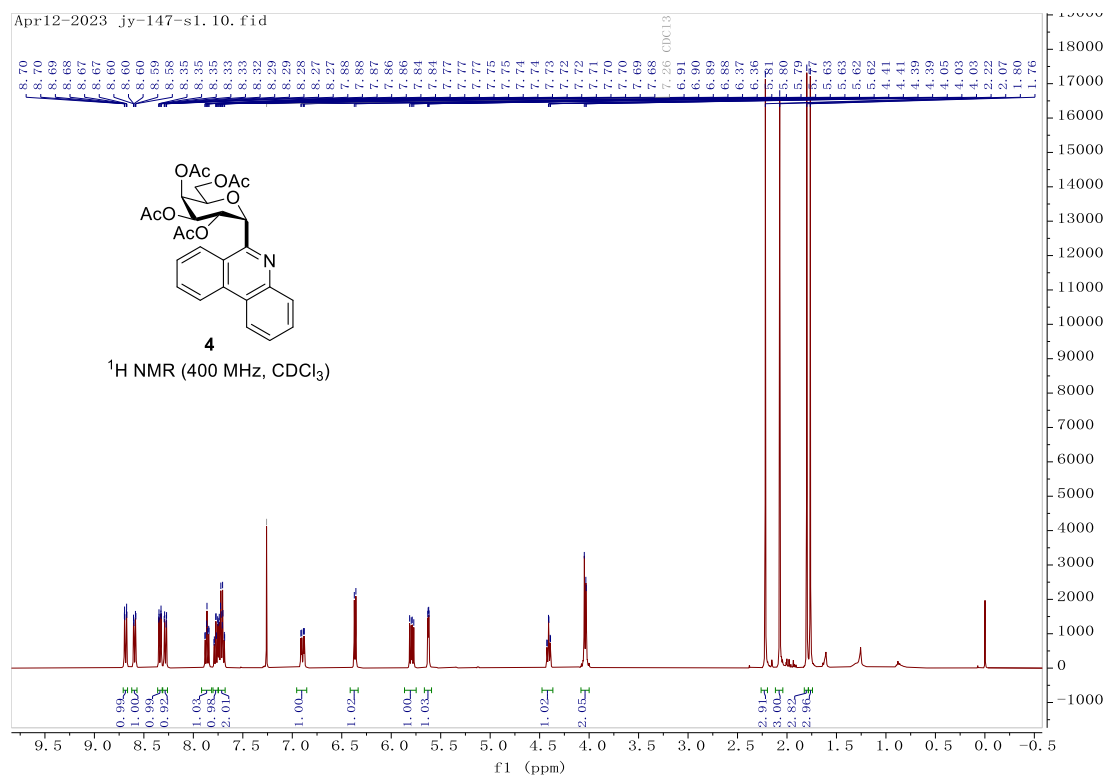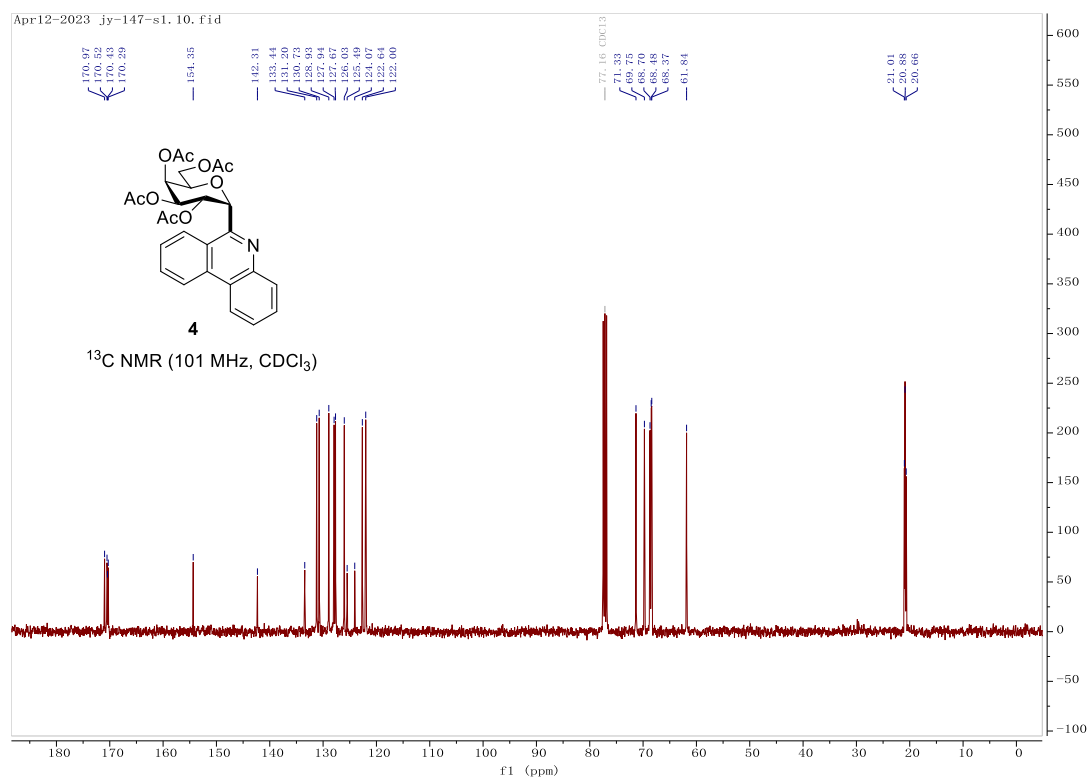

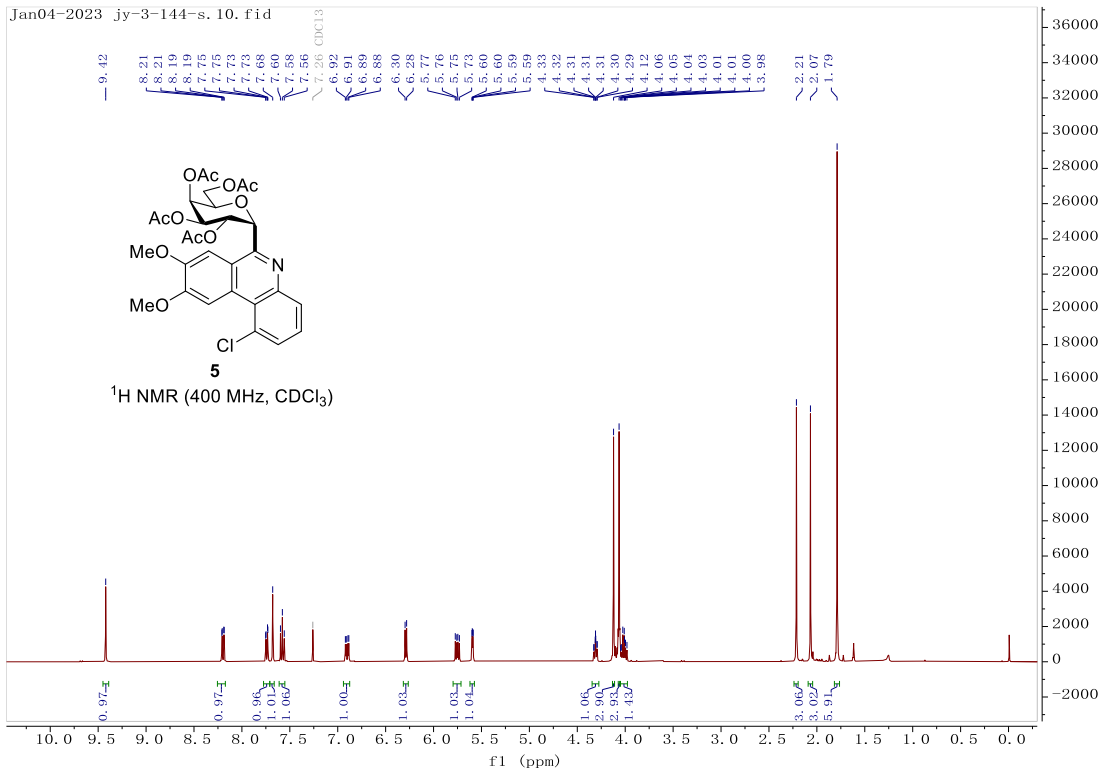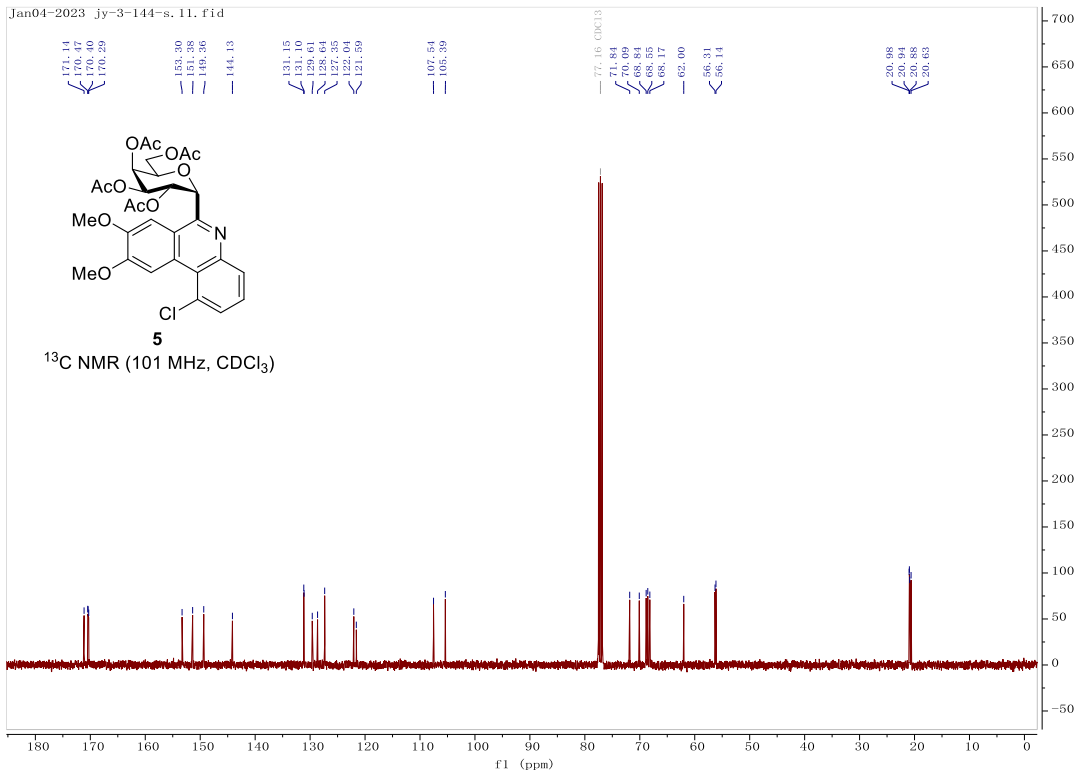

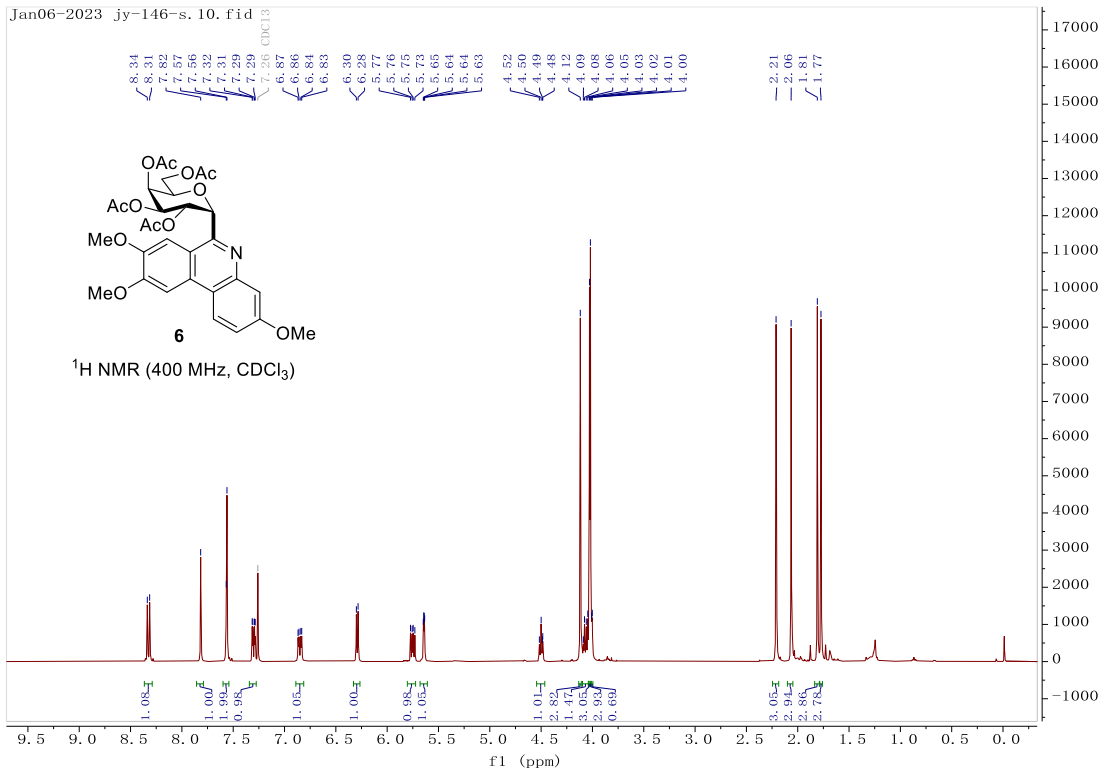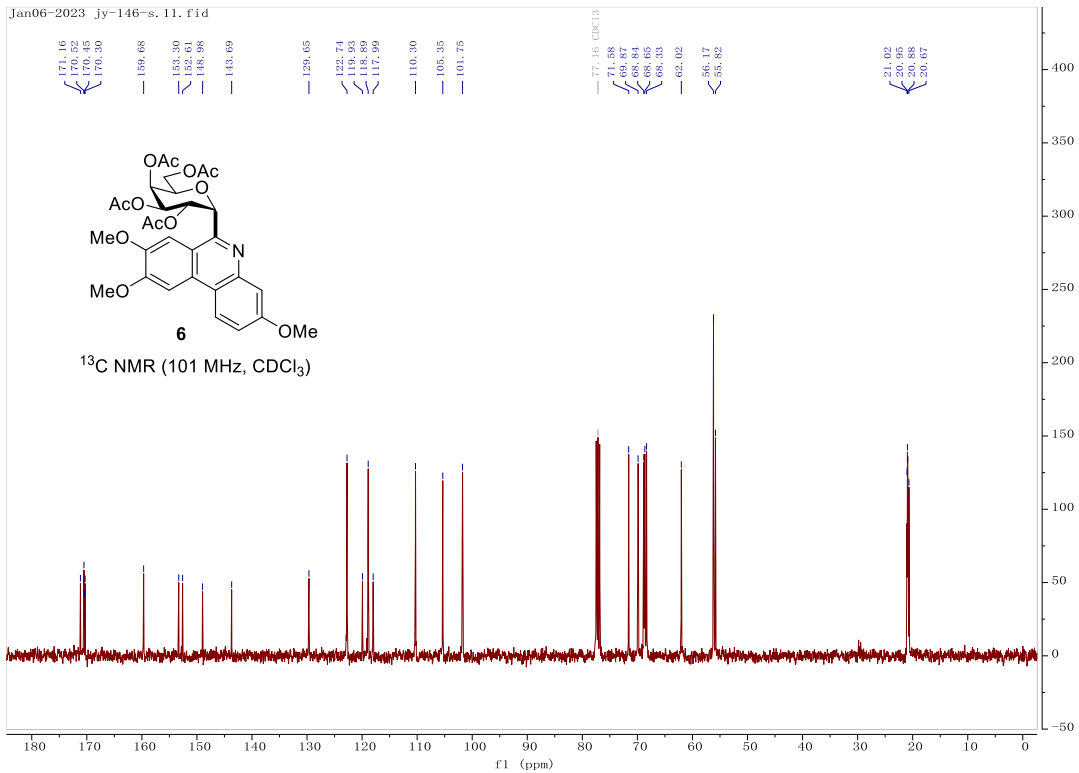

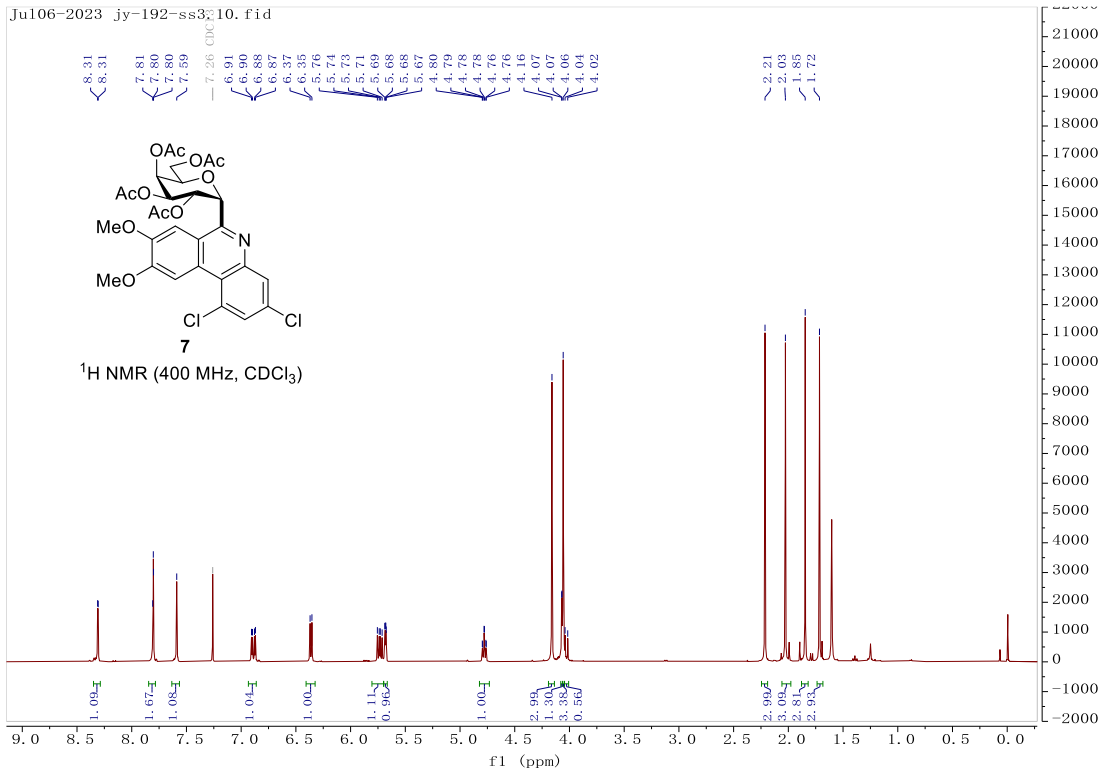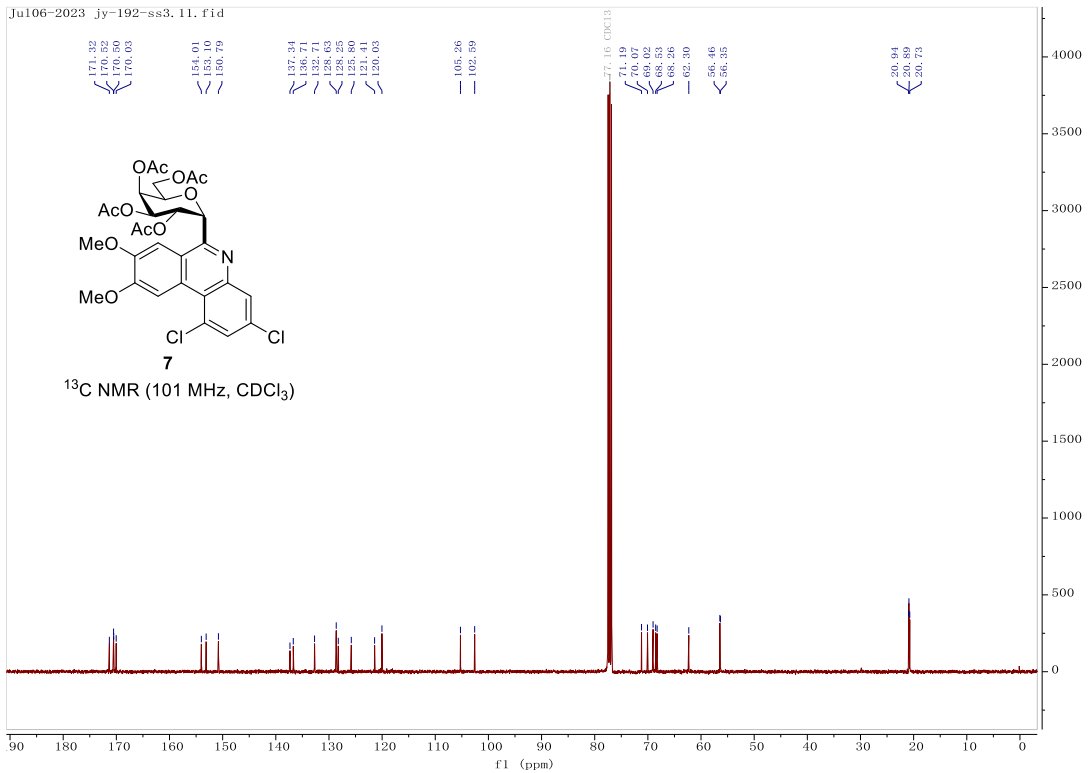

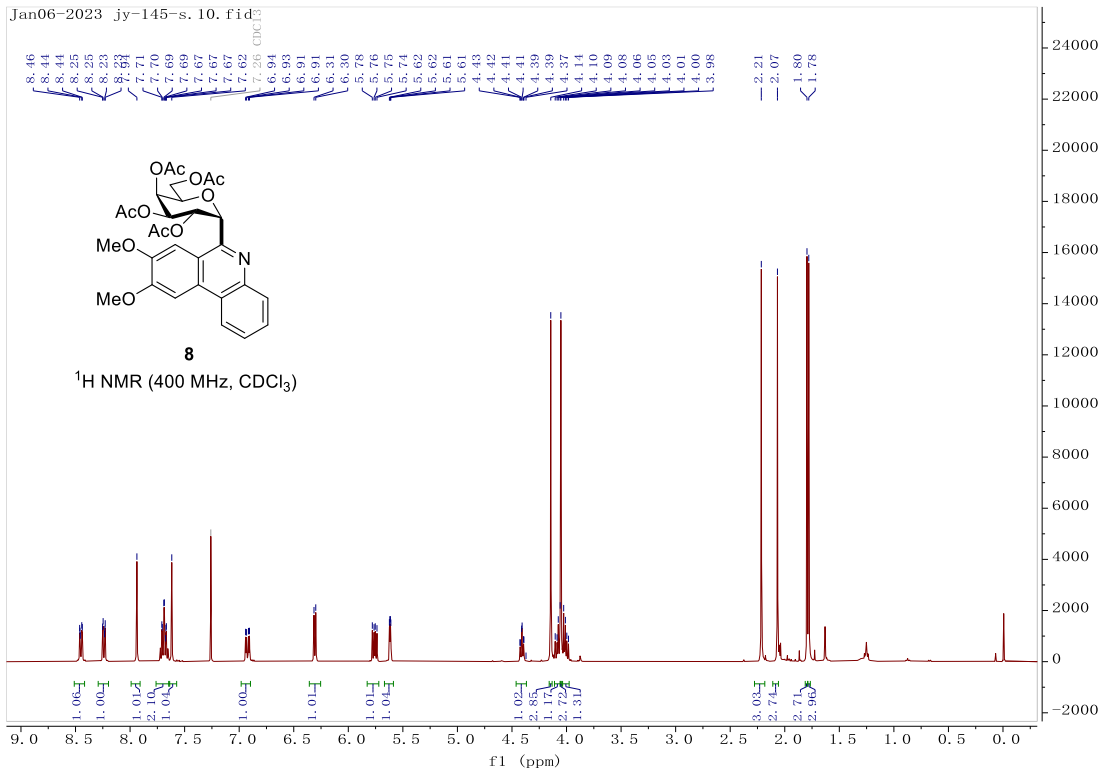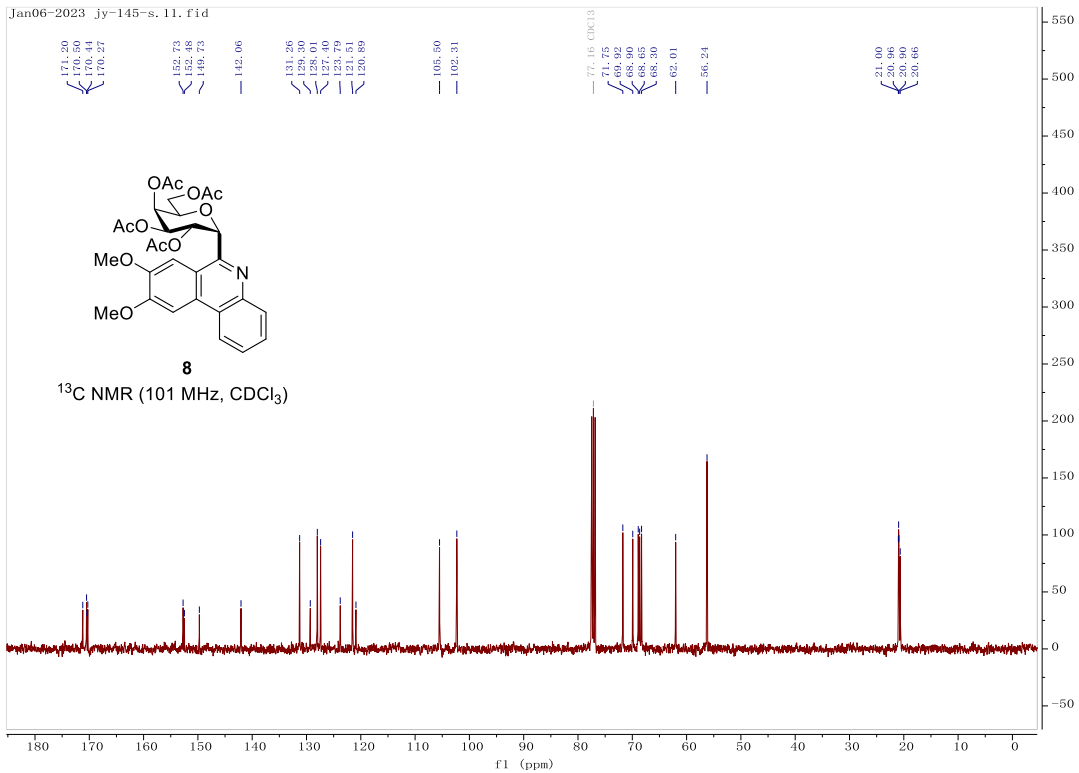



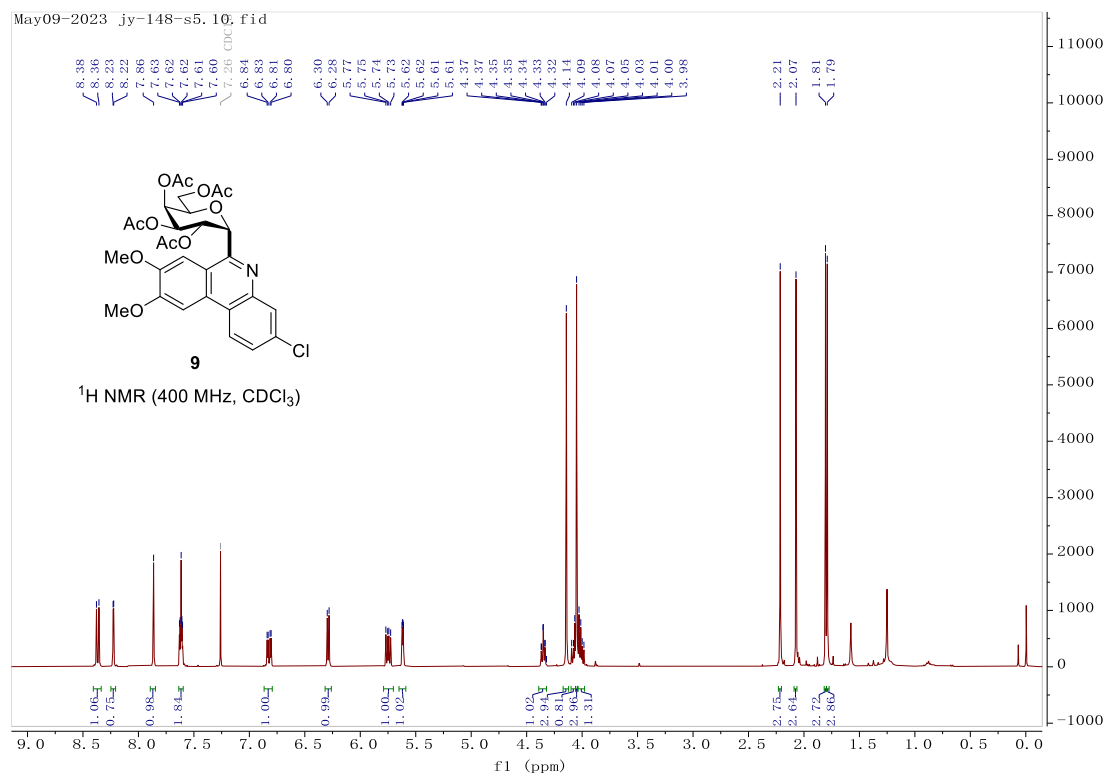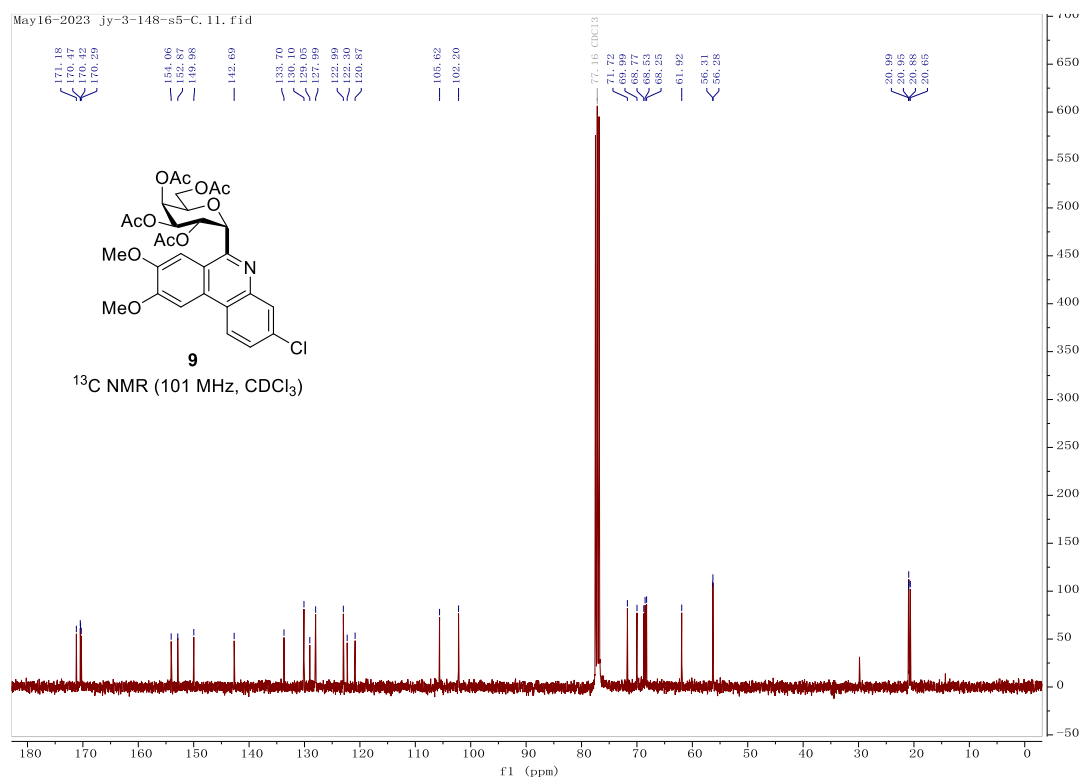

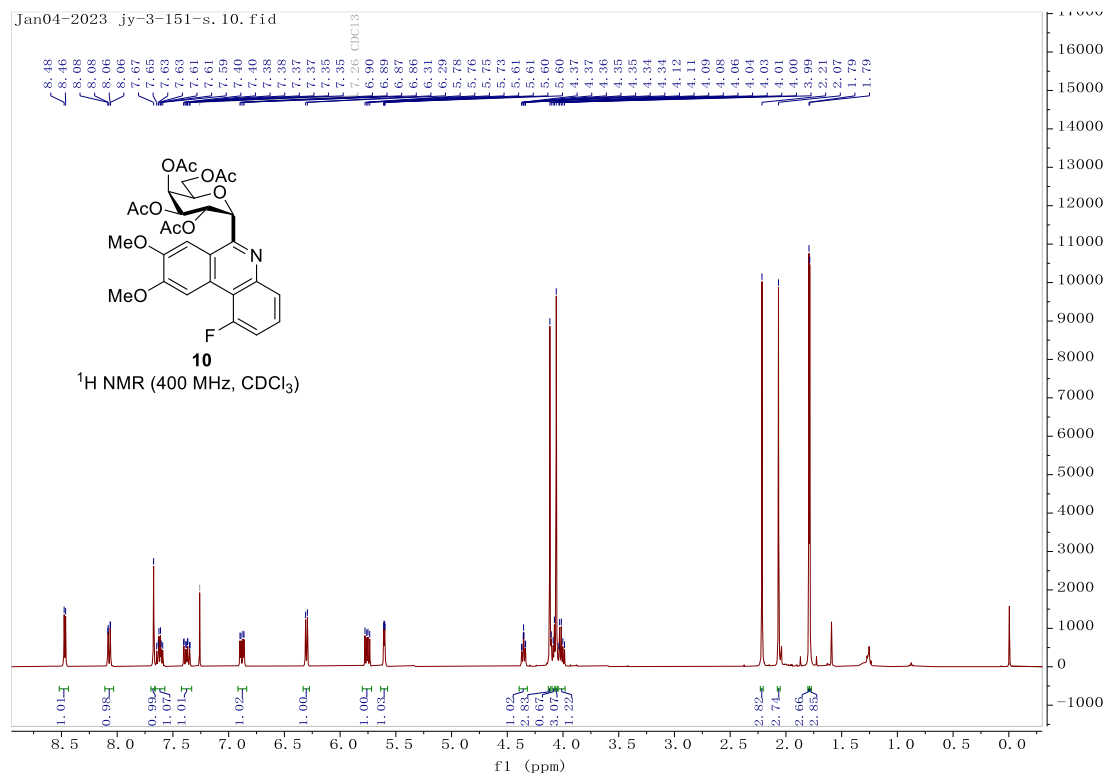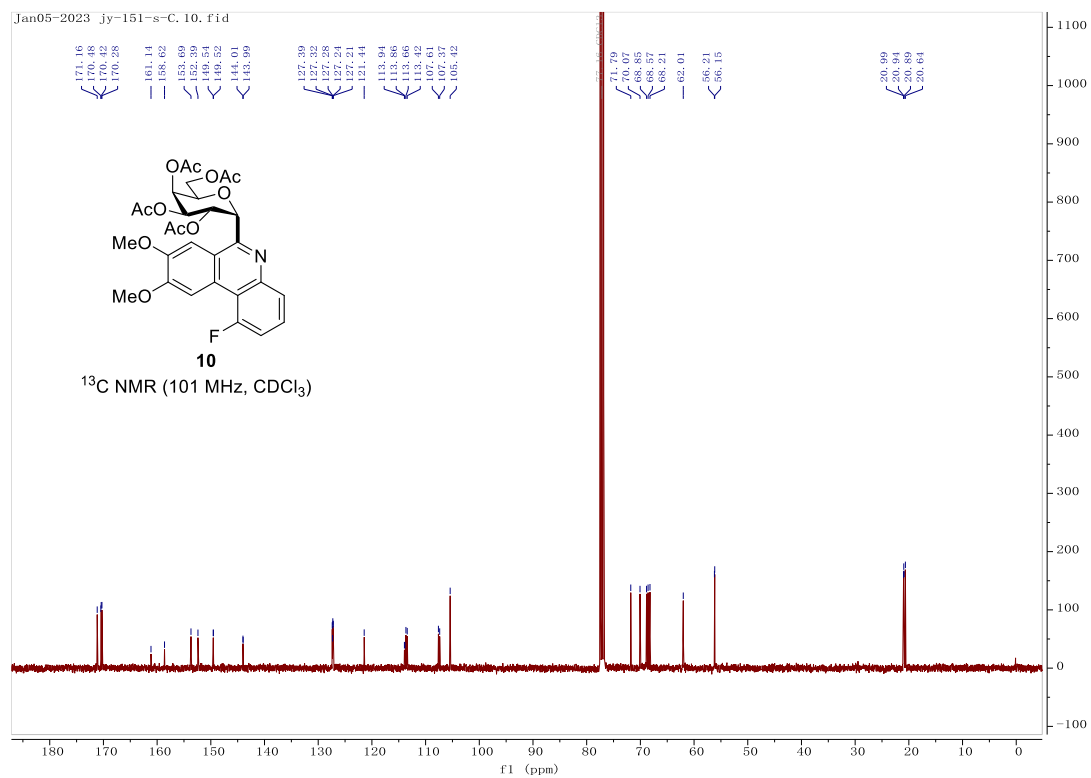

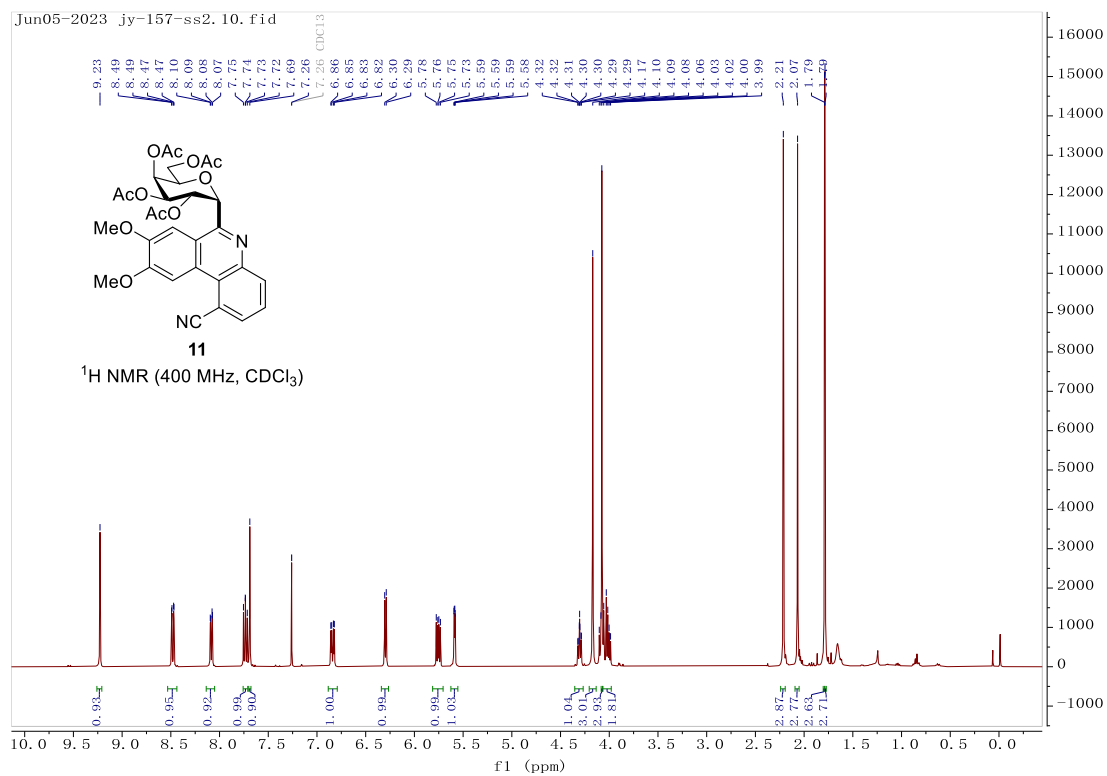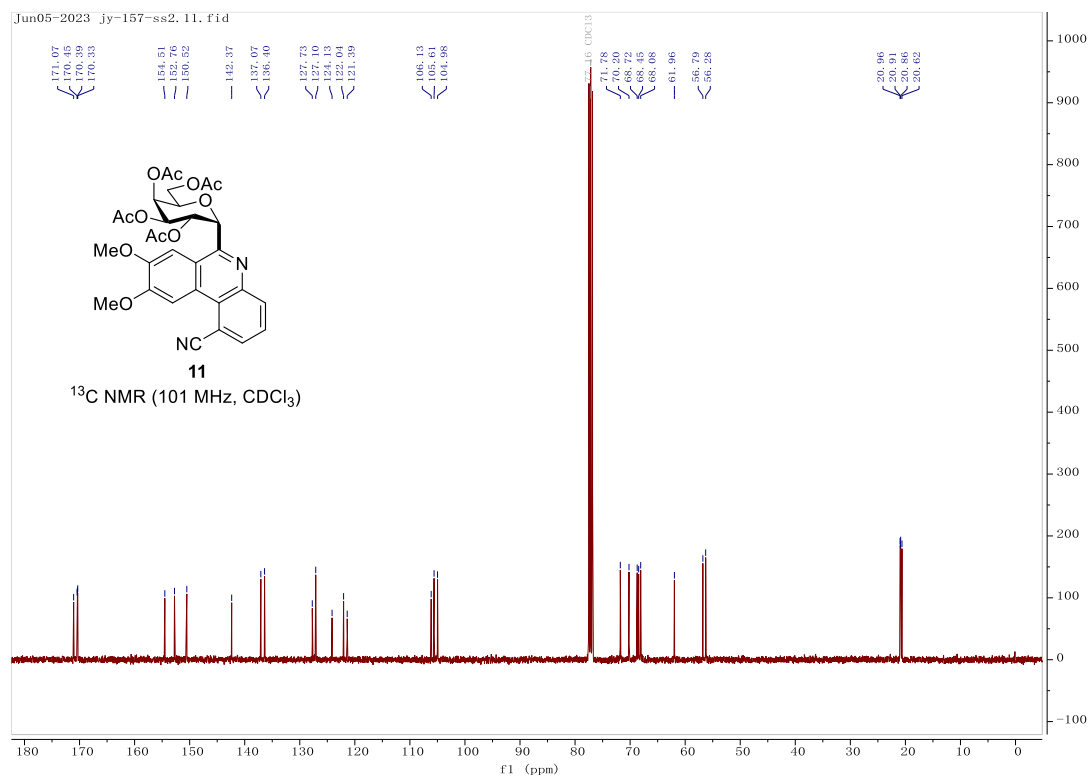

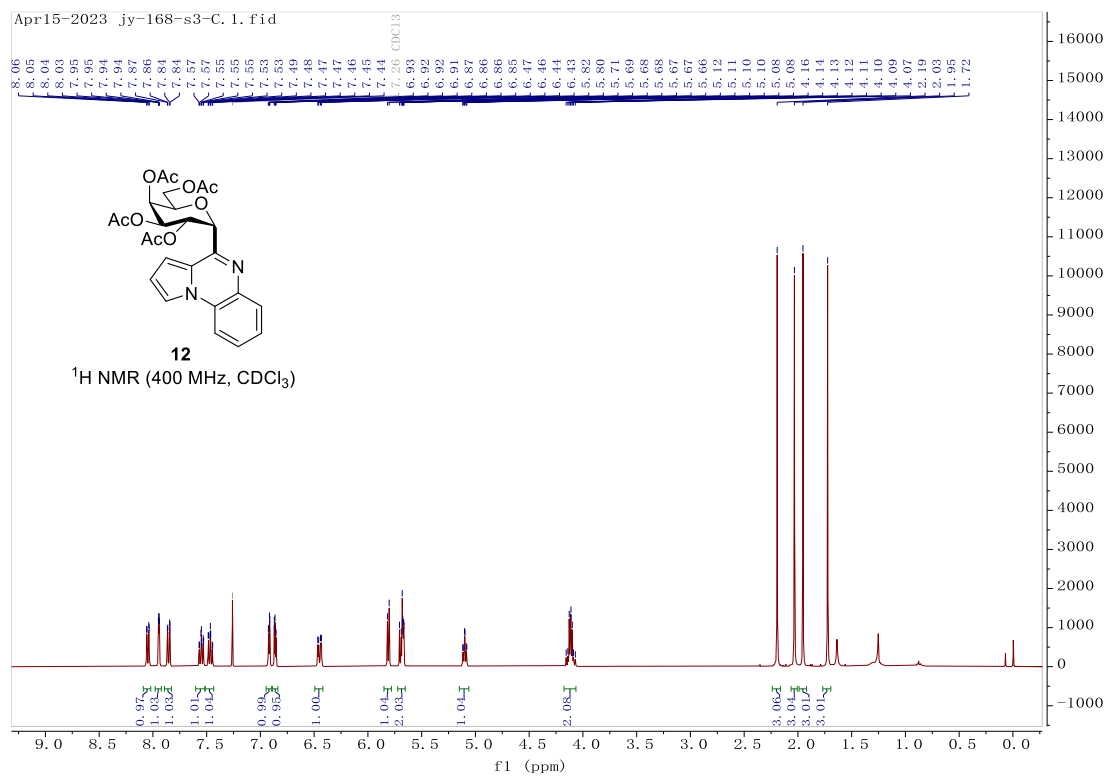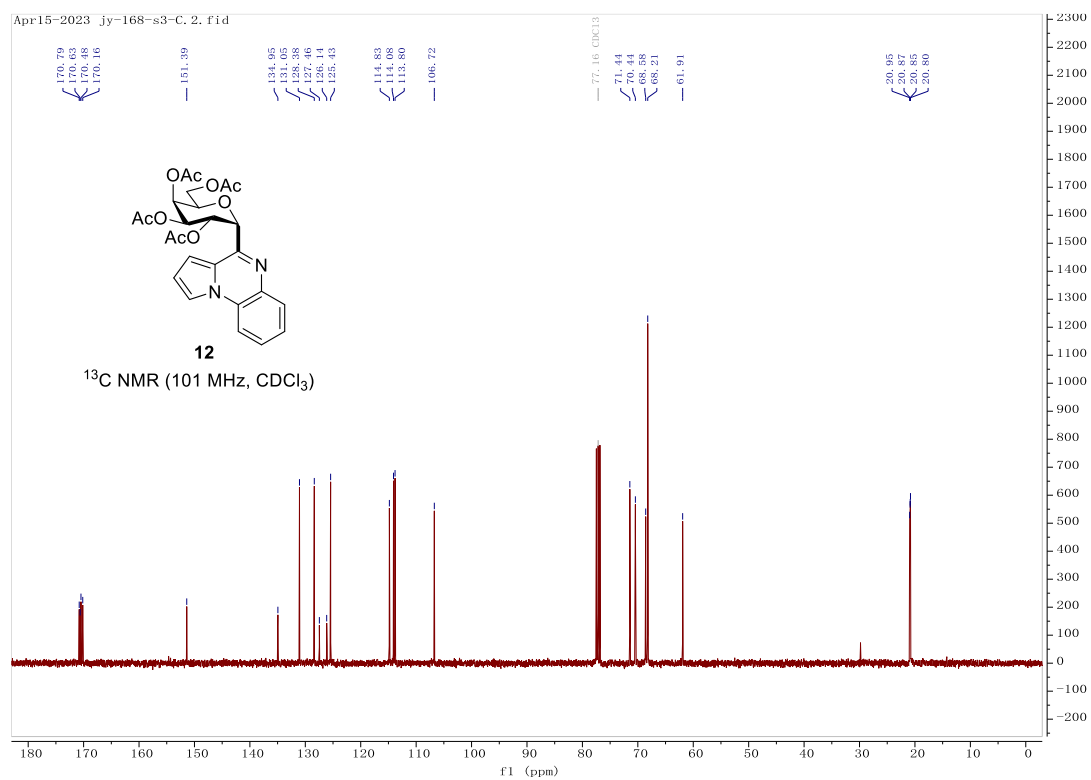



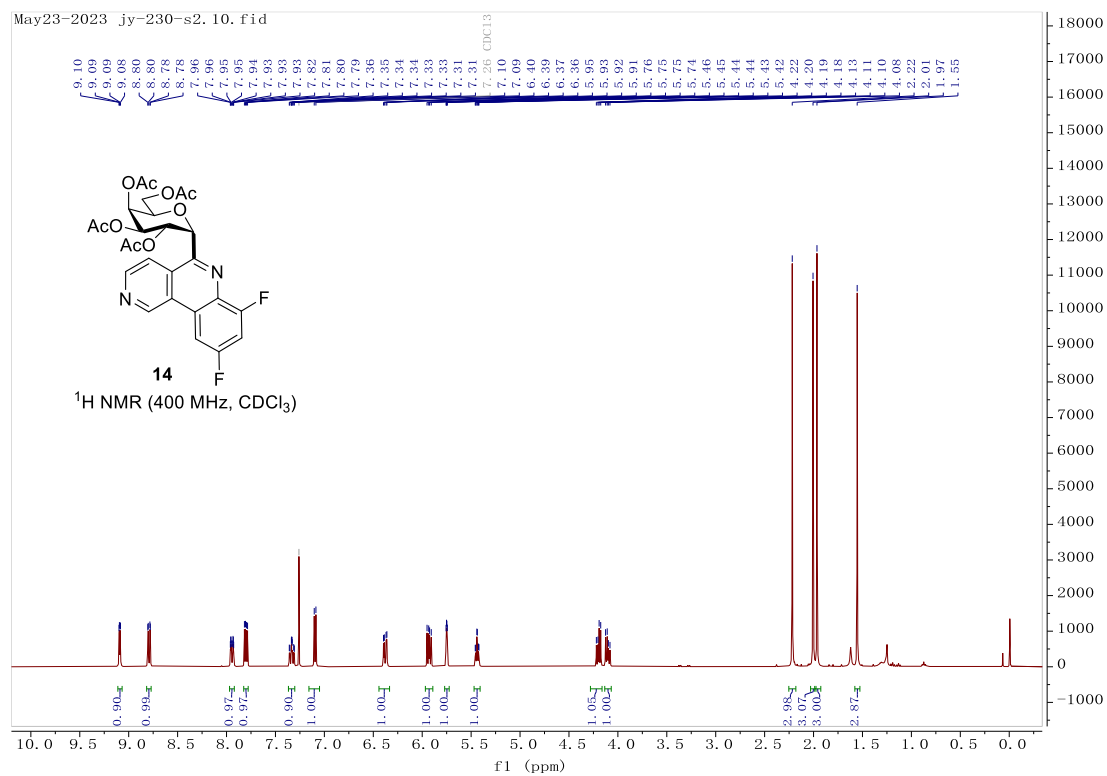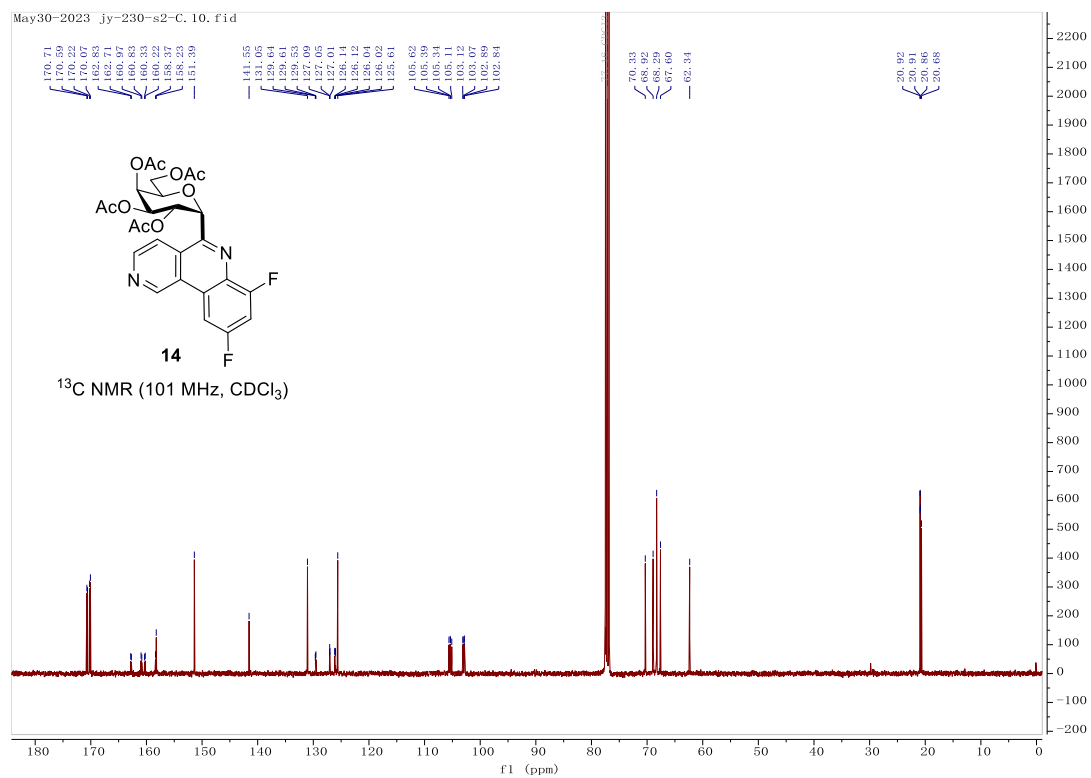

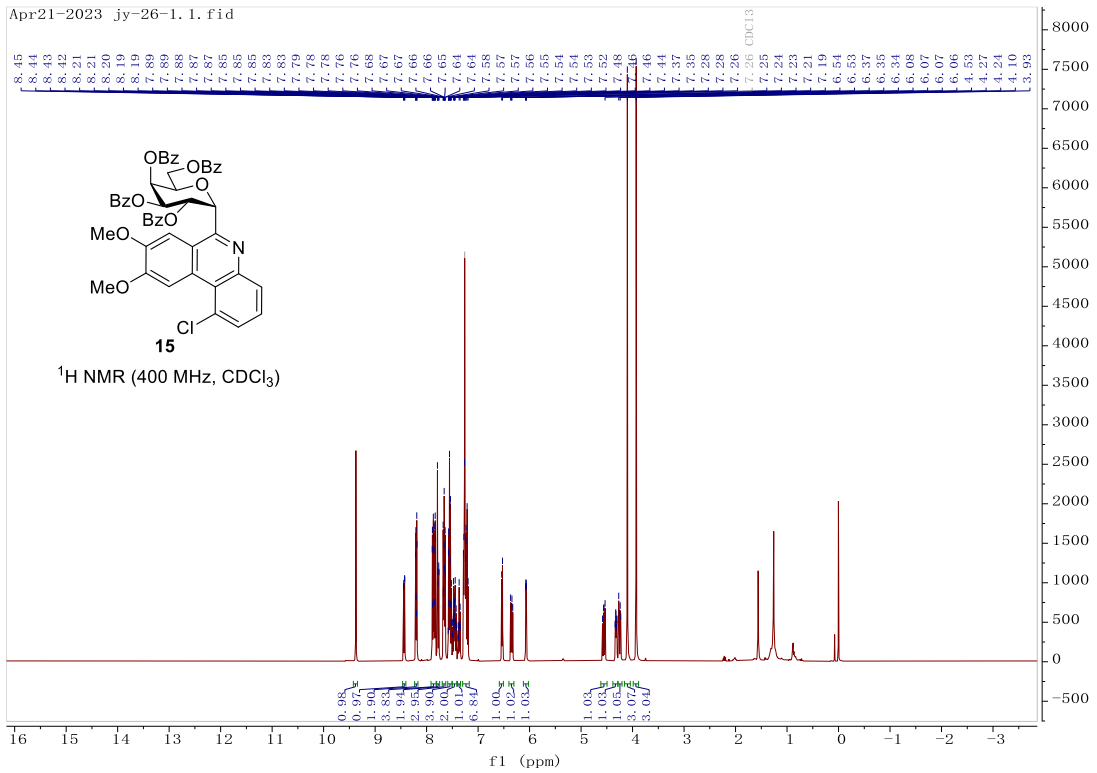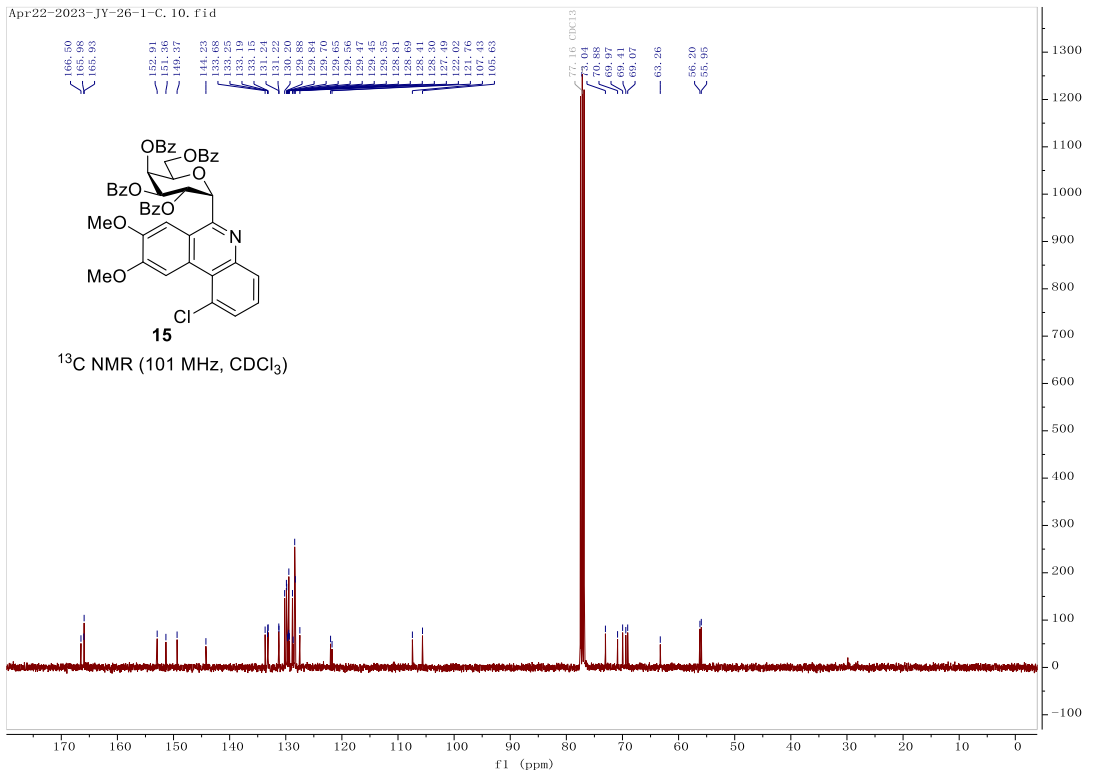





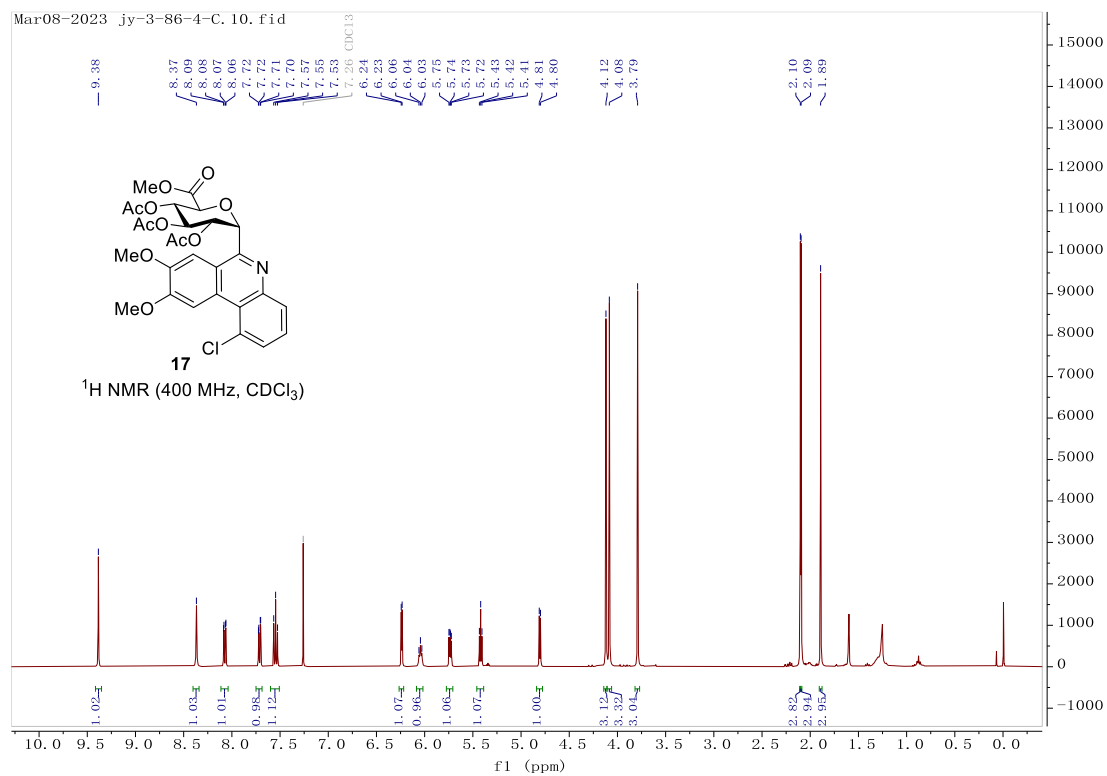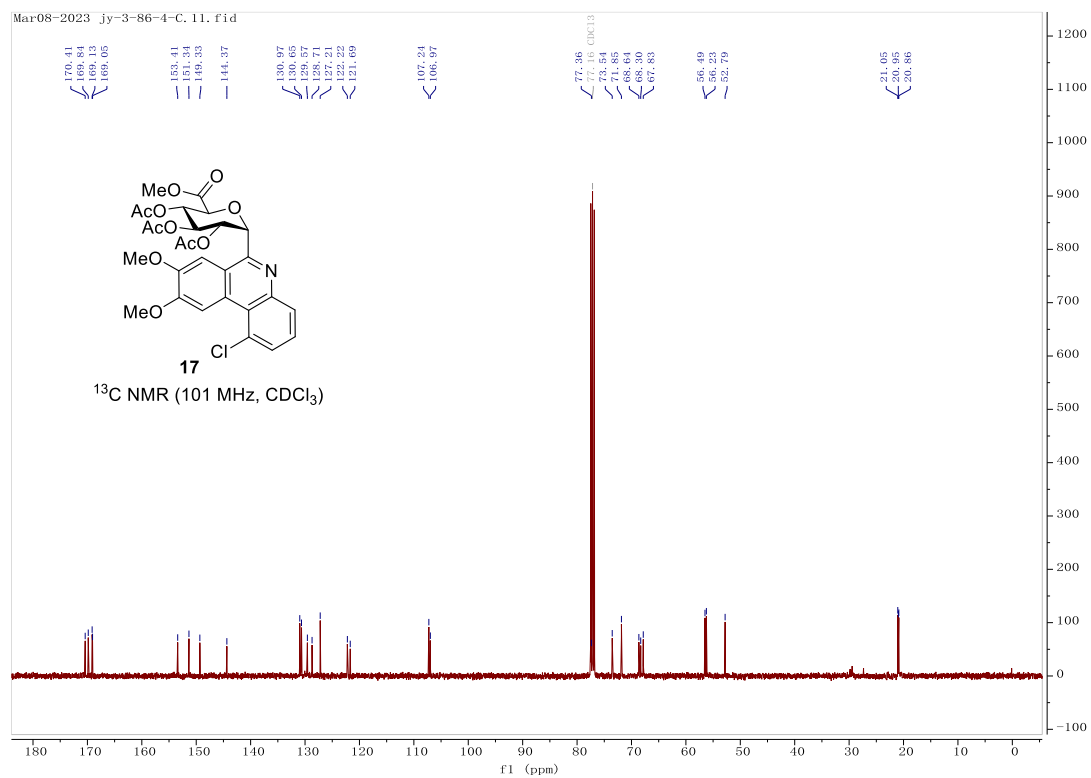

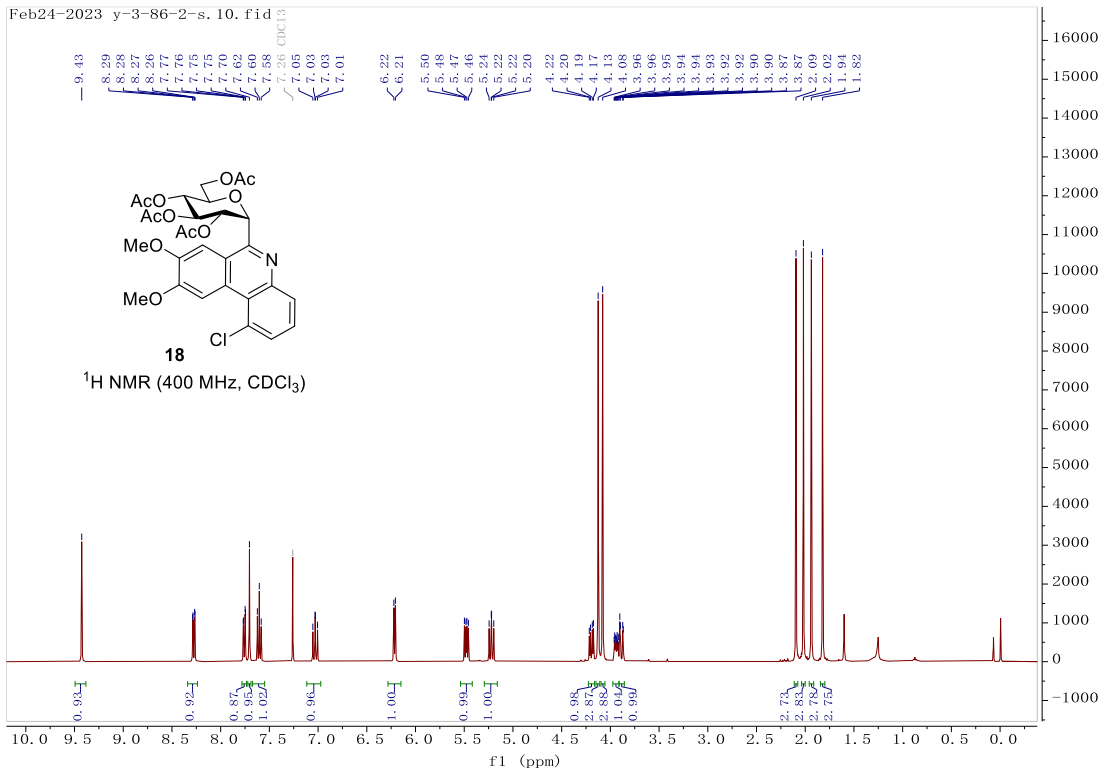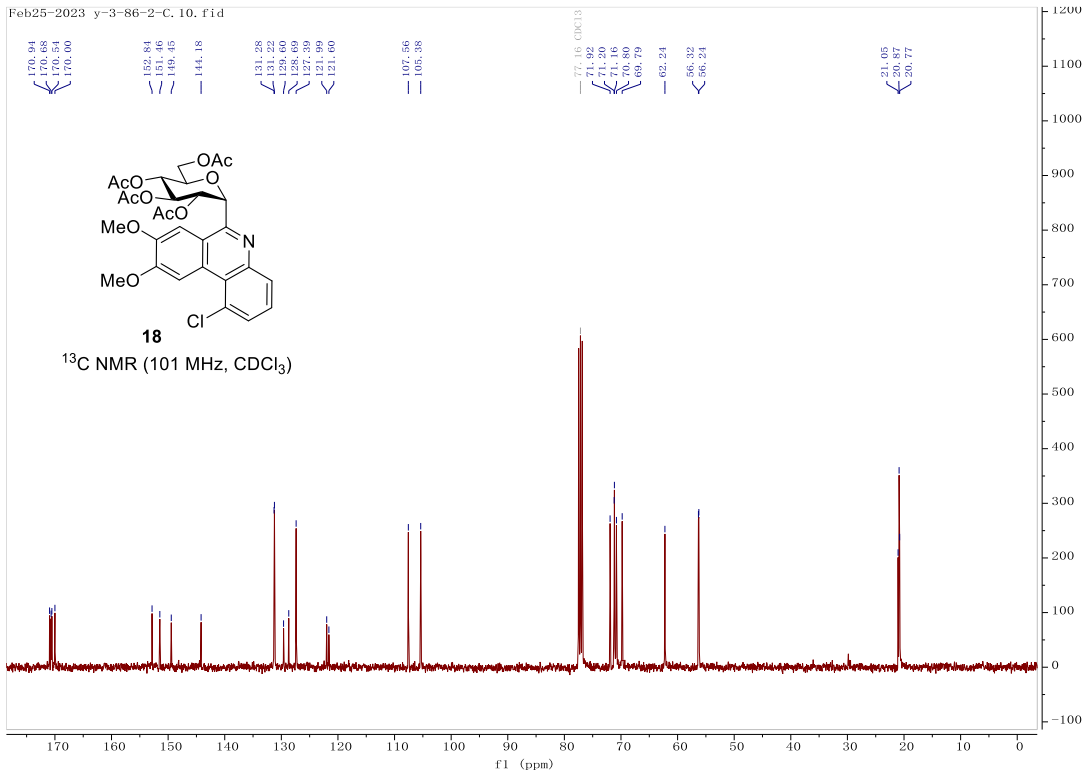

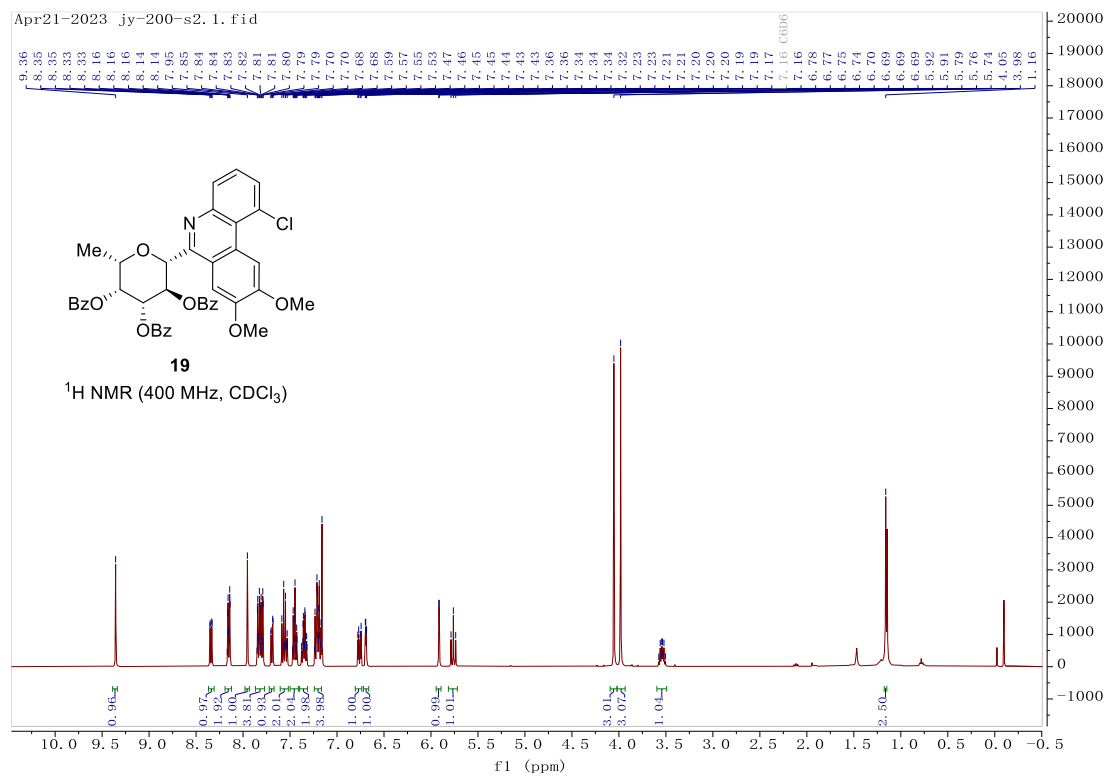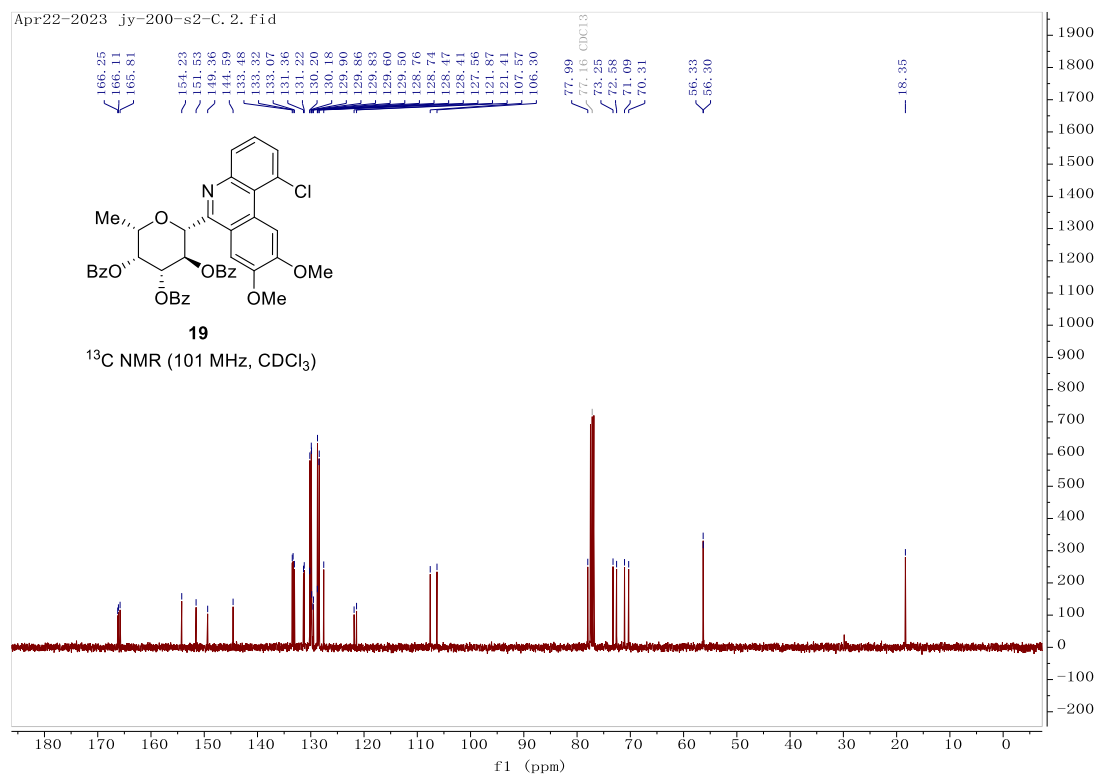

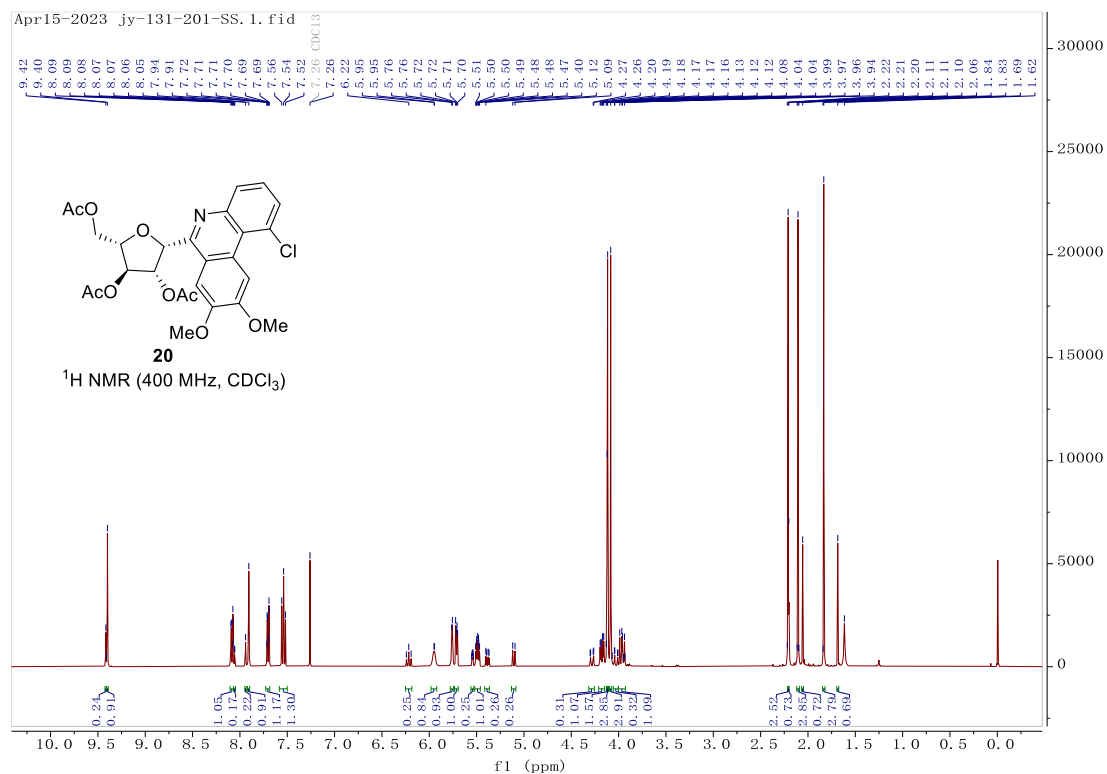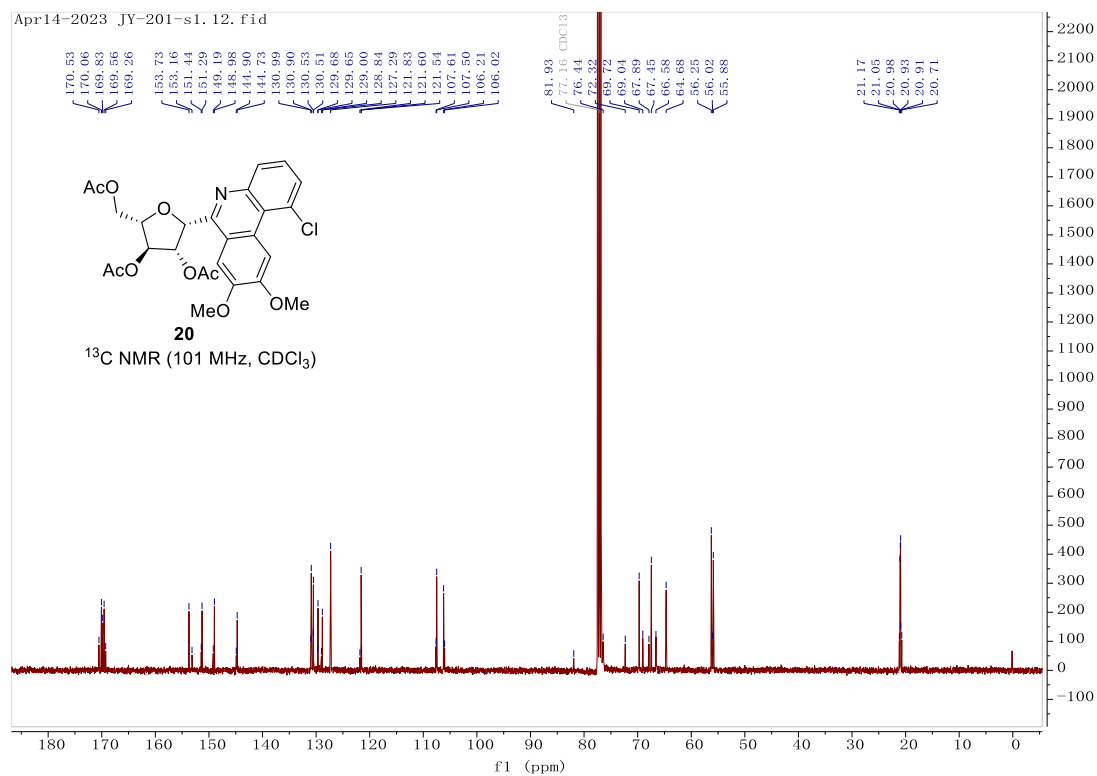

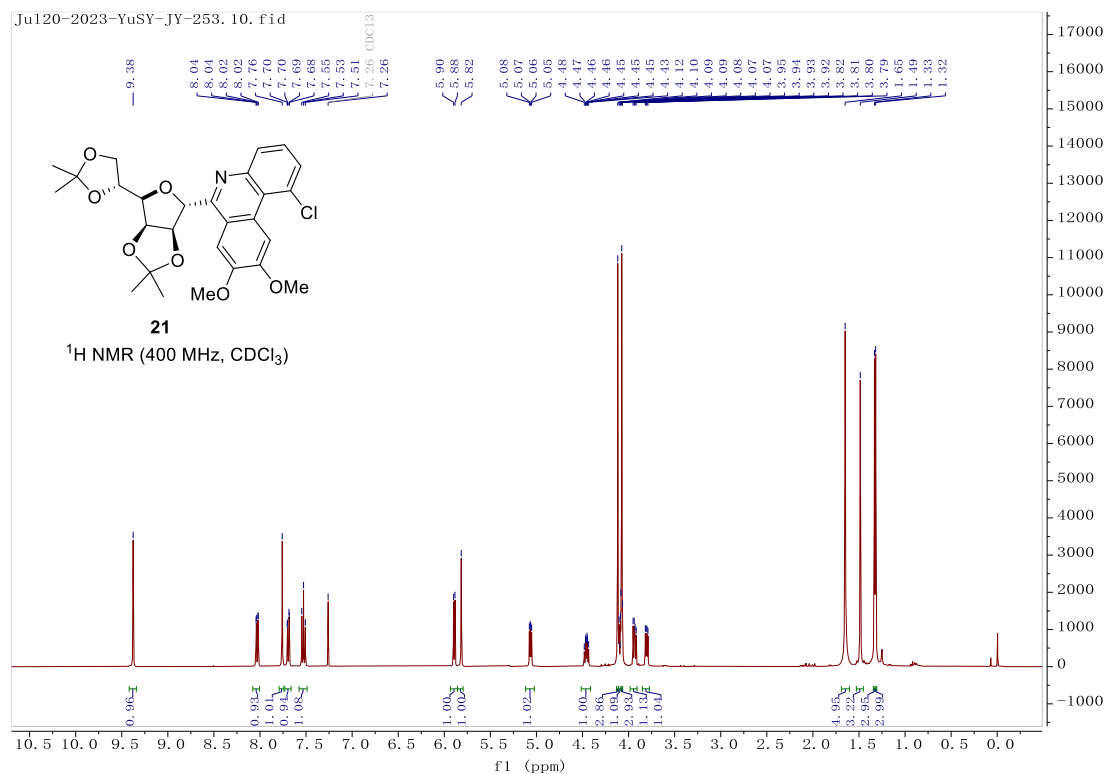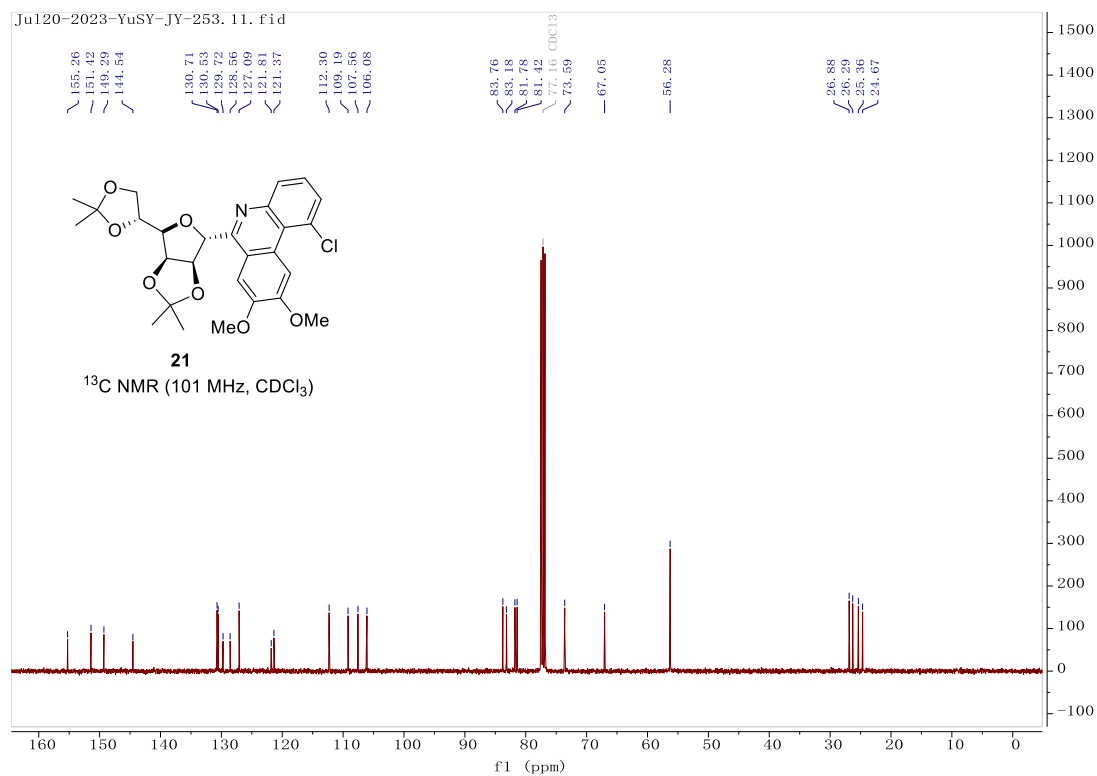

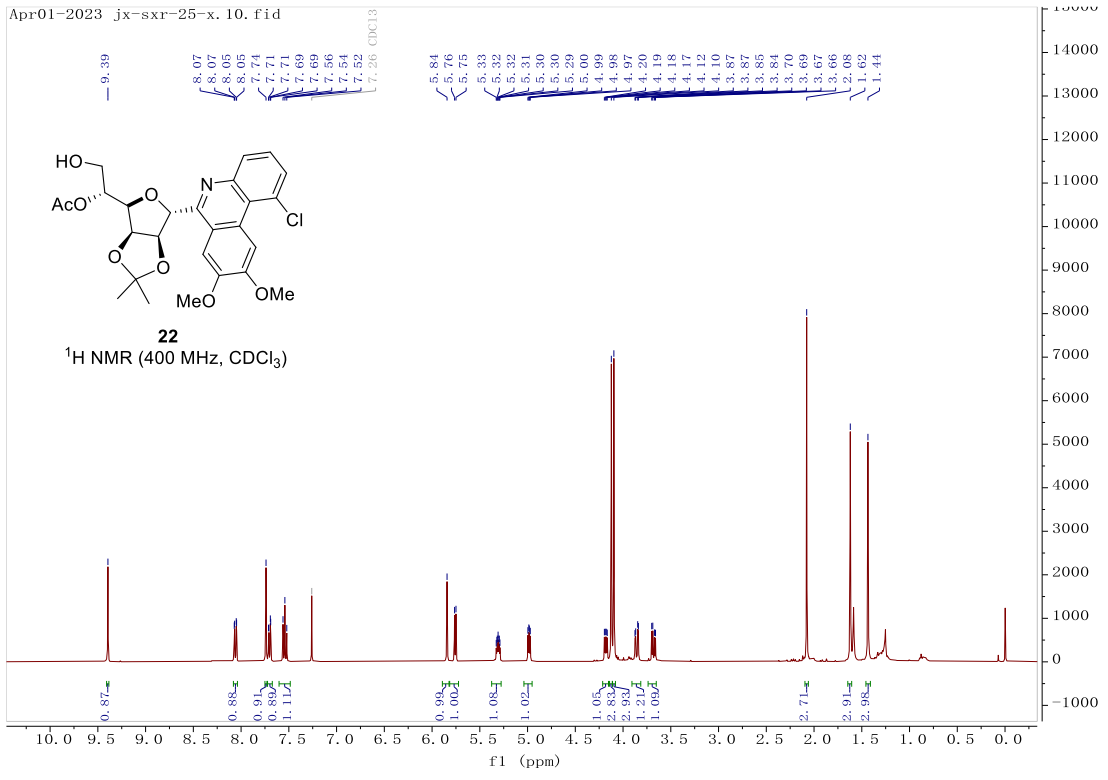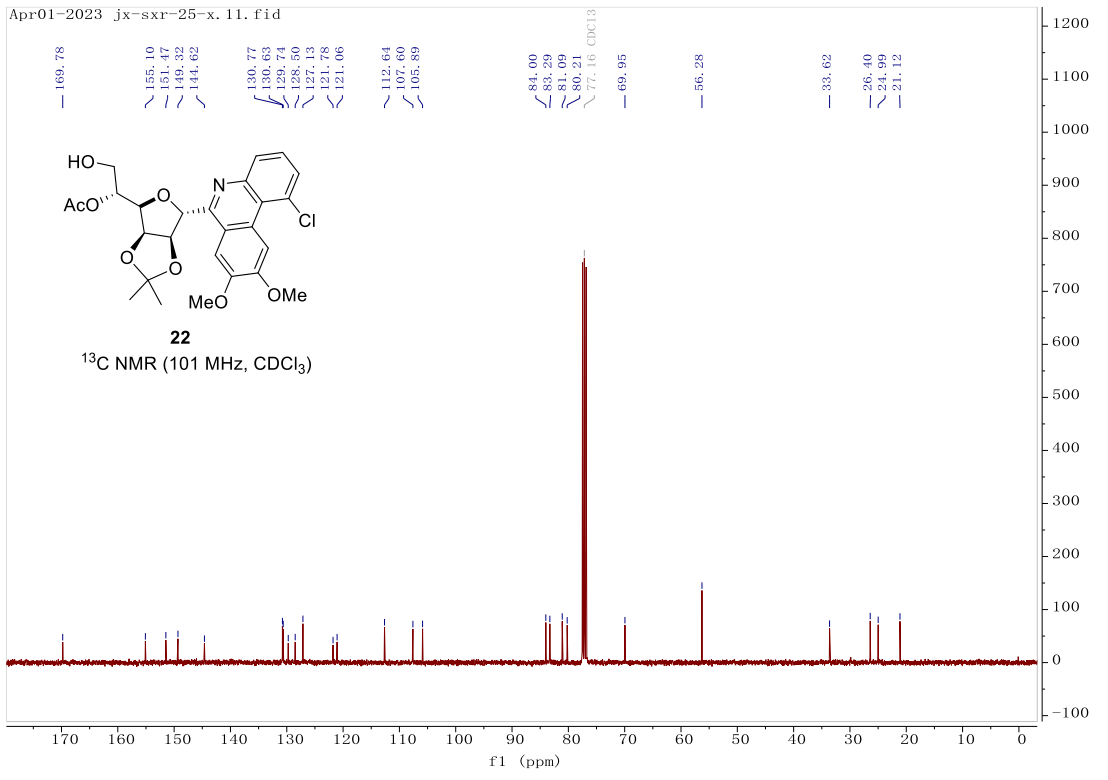

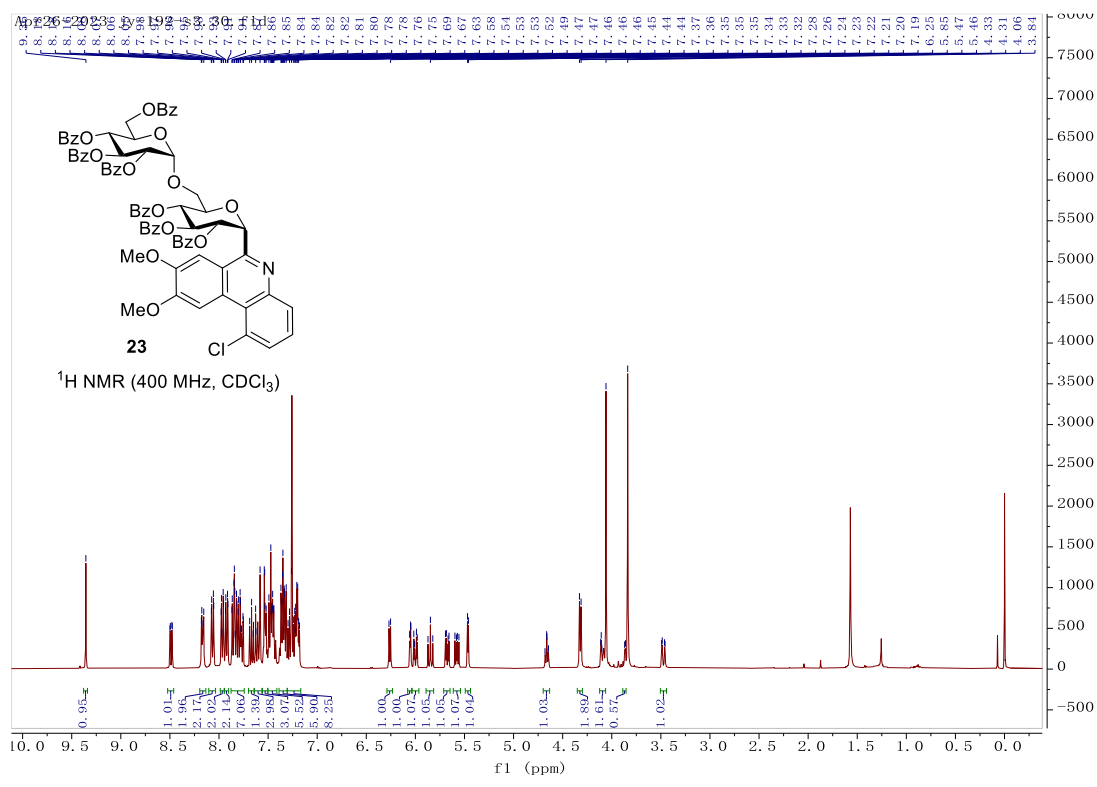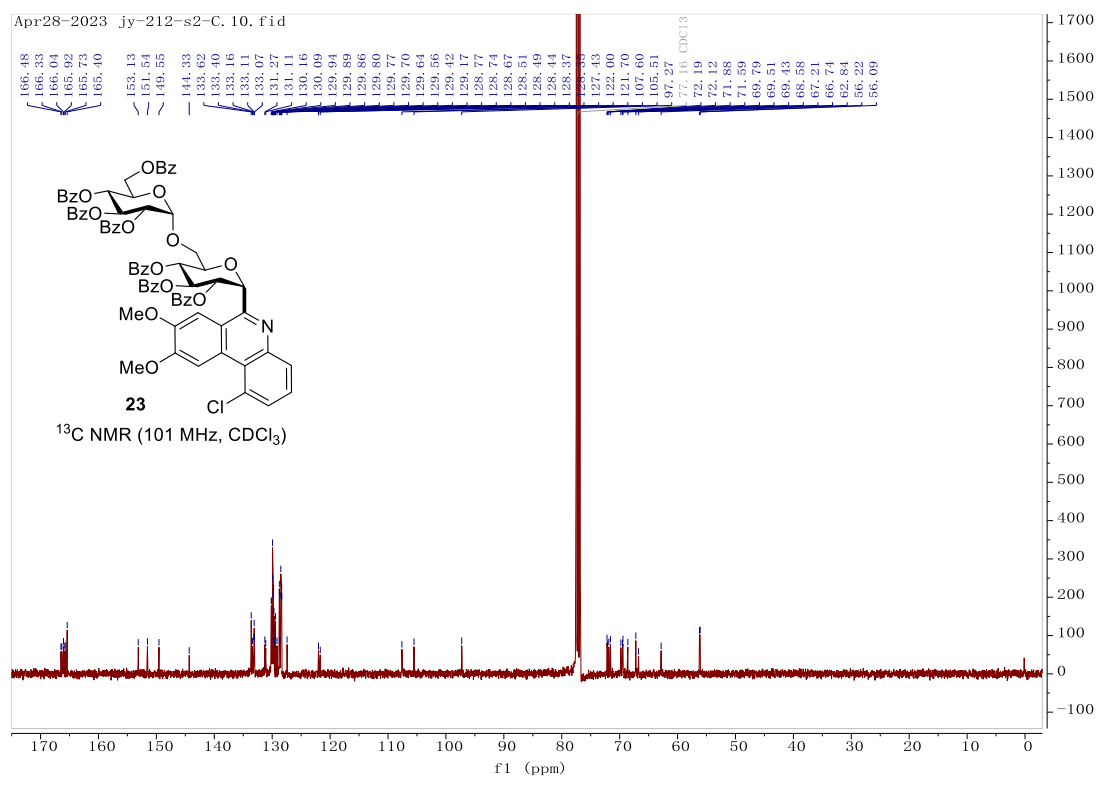

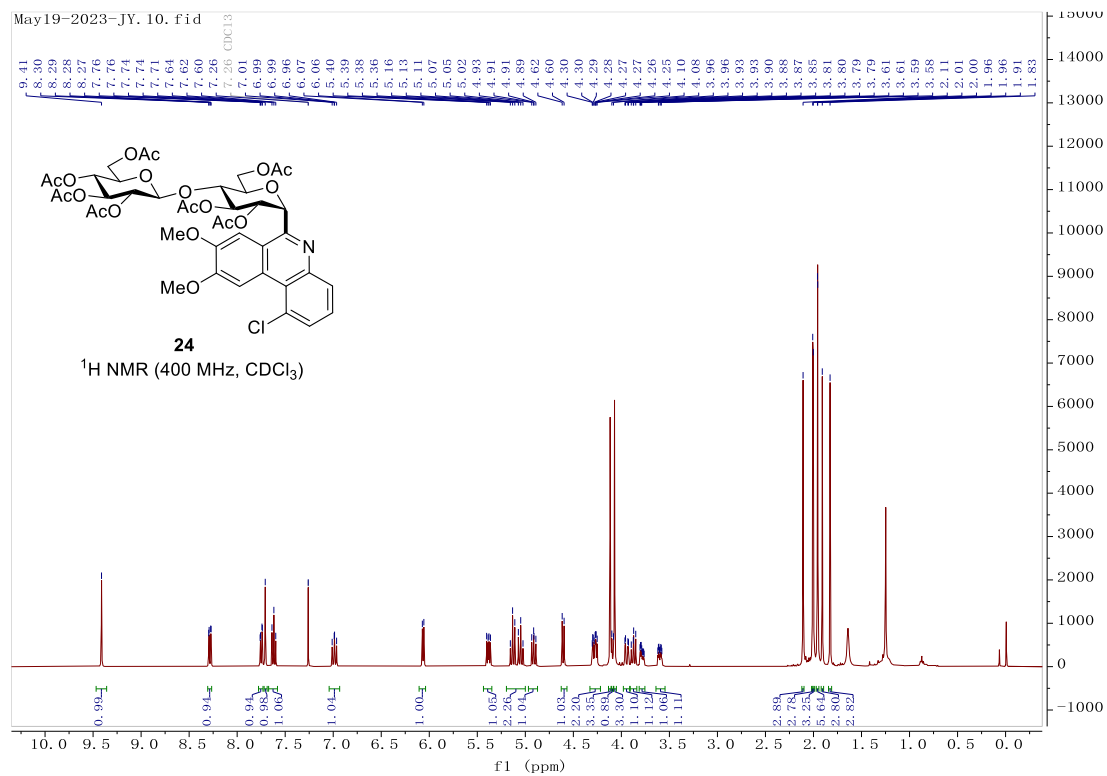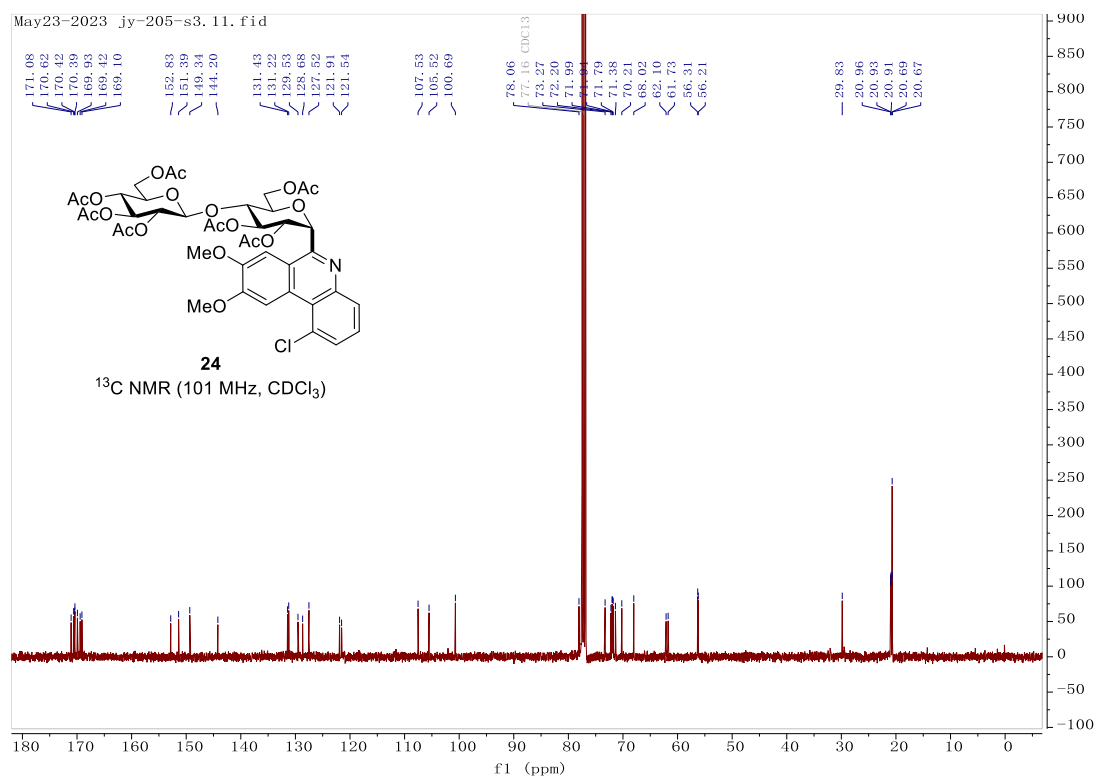



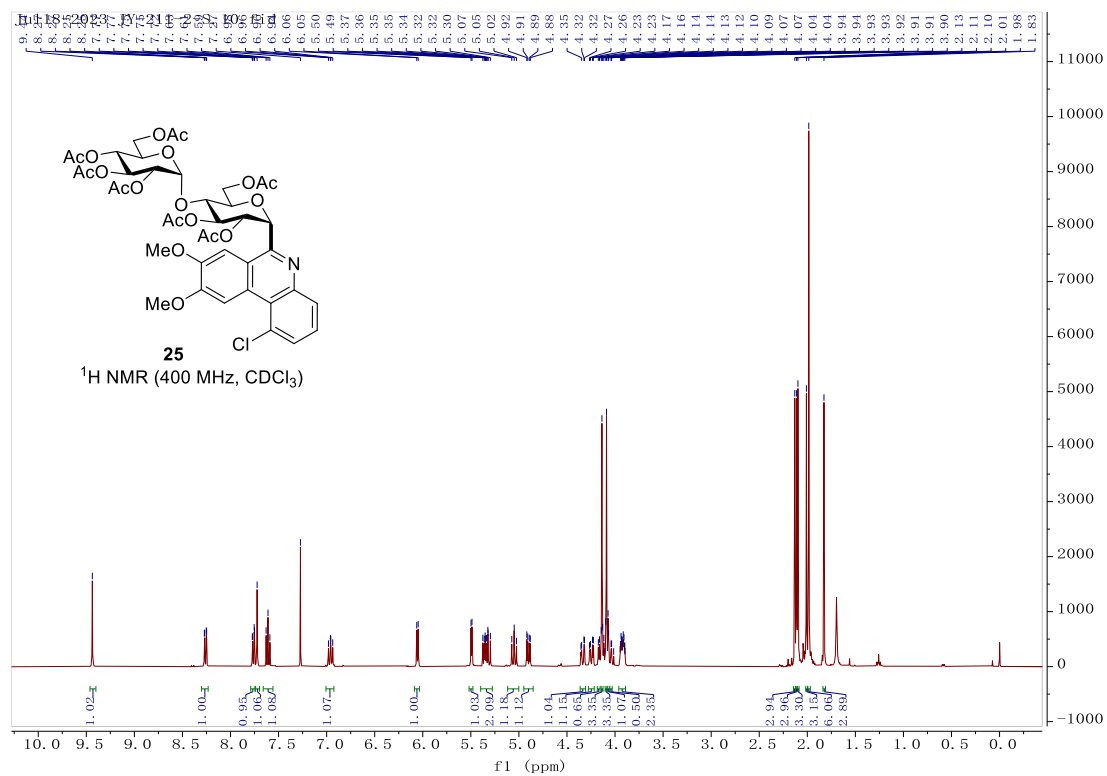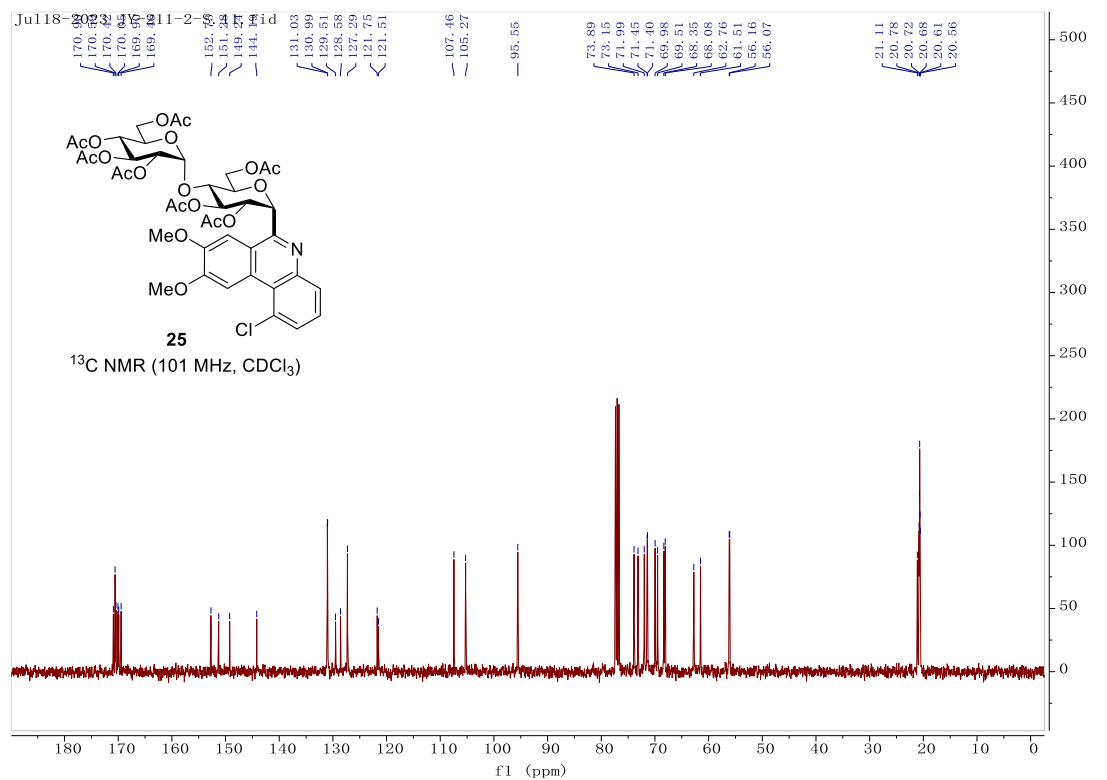

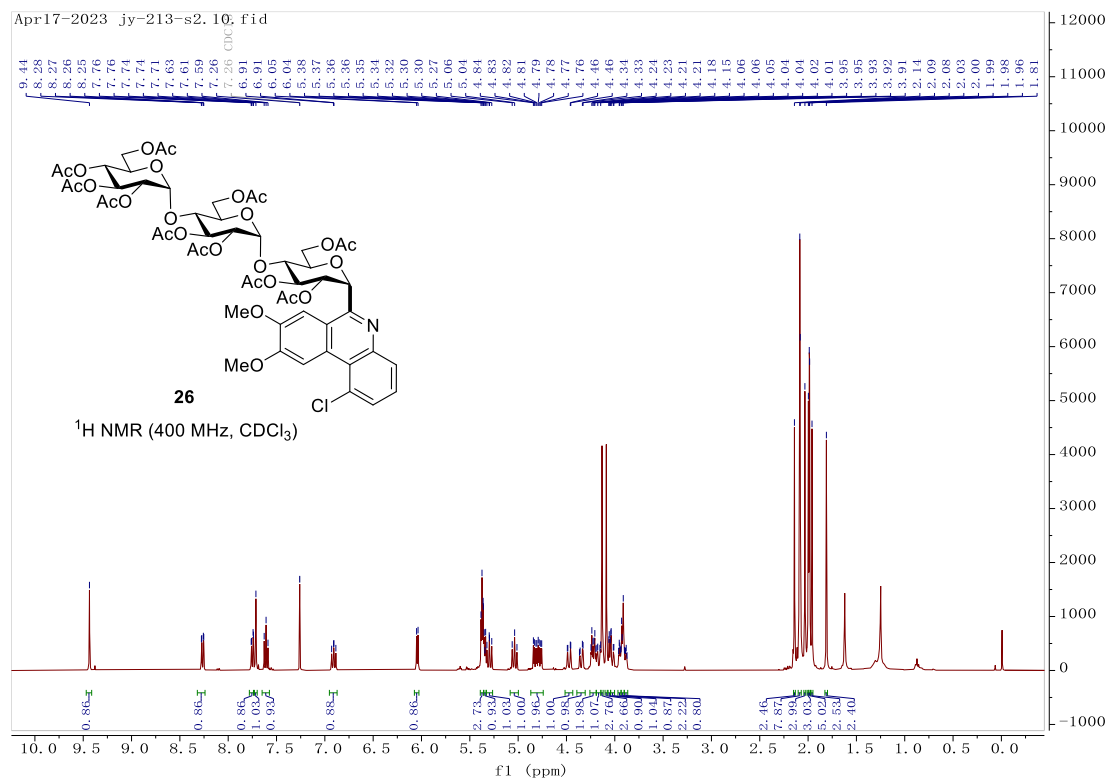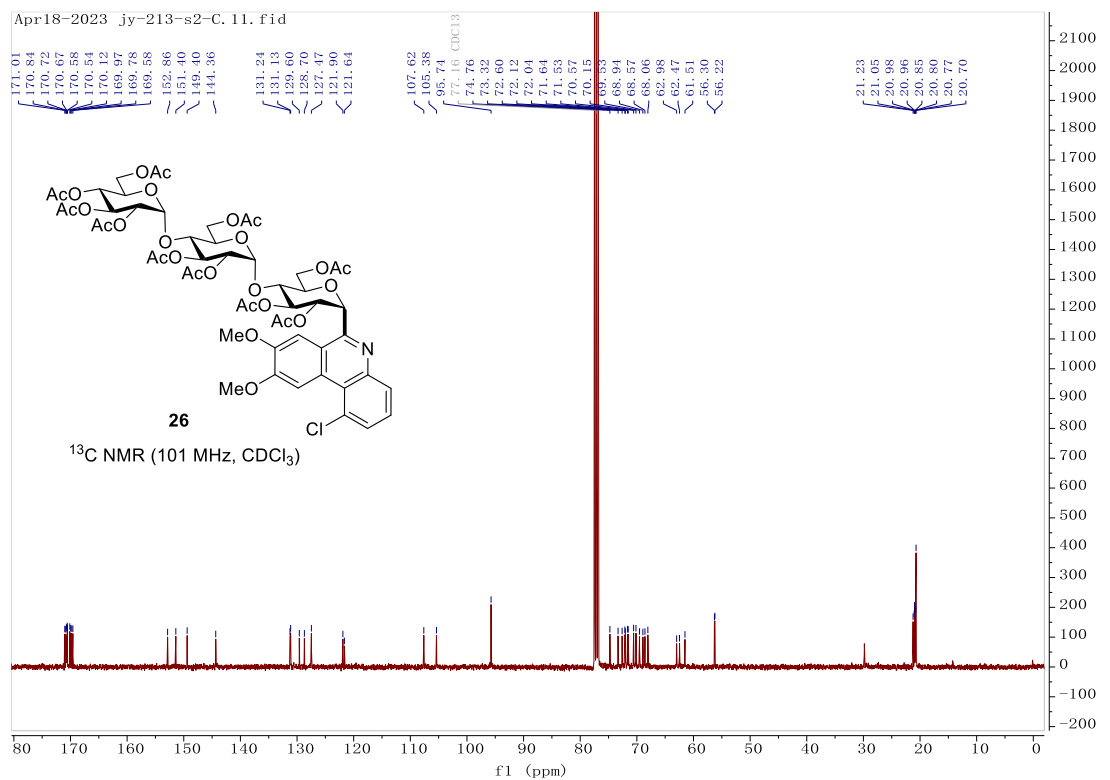

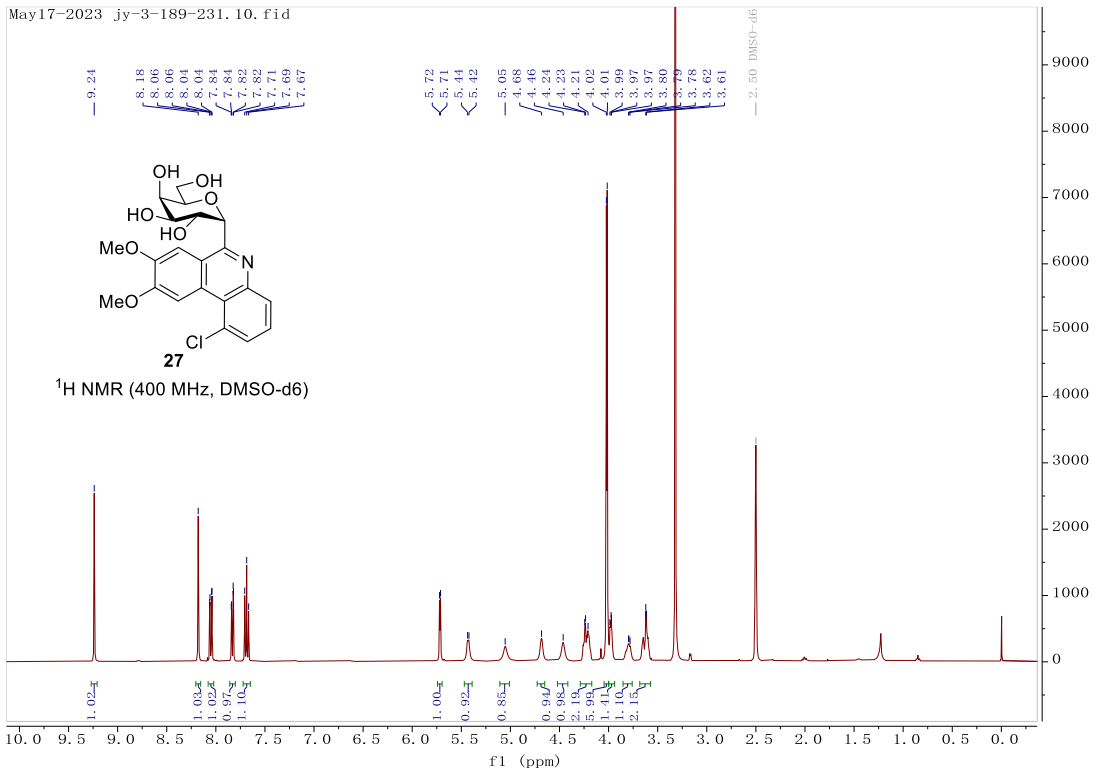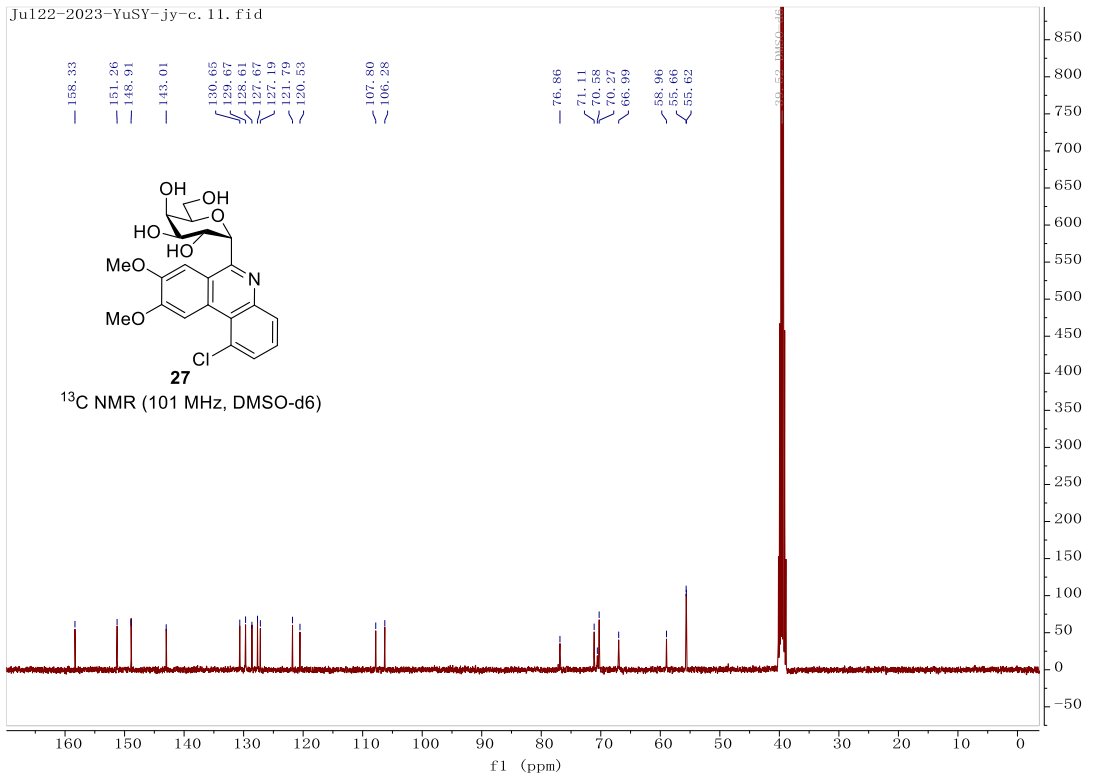

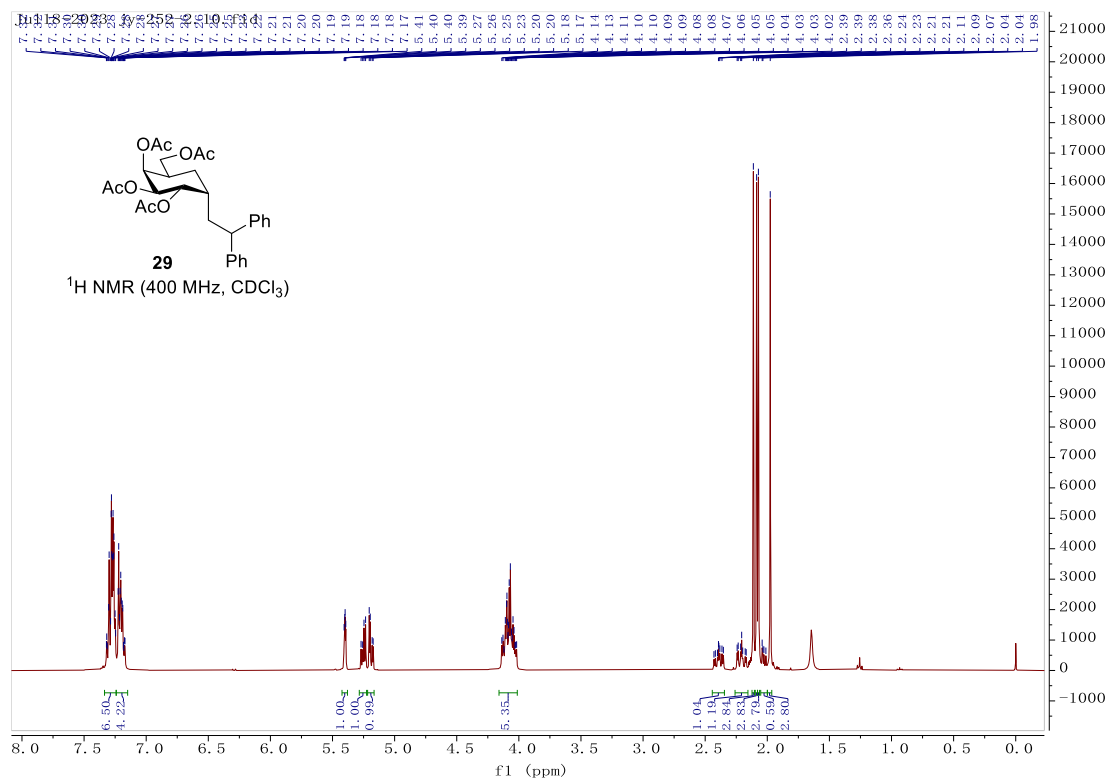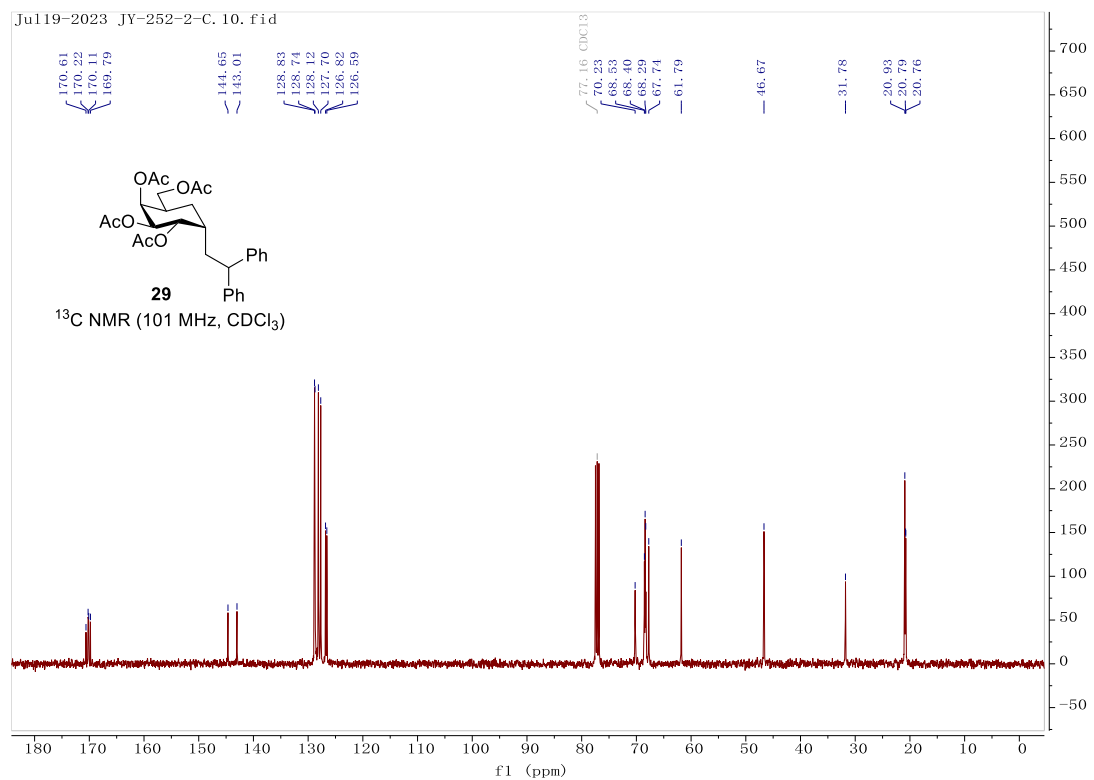

Supplement: d3cc03812b1.pdf [file d3cc03812b1.pdf]
